# Supplementary material for: Kabirimine, a New Cyclic Imine from an Okinawan Dinoflagellate
Source: PubMed Central journal article supplement (PMC6627061; doi:10.3390/md17060353), 2019-06-13
Supplement: marinedrugs-17-00353-s001.pdf [file marinedrugs-17-00353-s001.pdf]

## **Kabirimine, an antiviral cyclic imine from an Okinawan dinoflagellate**

Idam Hermawan<sup>1</sup>, Mikako Higa<sup>1</sup>, Philipus Uli Basa Hutabarat<sup>1</sup>, Takeshi Fujiwara<sup>2</sup>,  
Kiyotaka Akiyama<sup>2</sup>, Akihiko Kanamoto,<sup>2</sup> Takahiro Haruyama<sup>3</sup>, Nobuyuki Kobayashi<sup>3</sup>,  
Masahiro Higashi<sup>4</sup>, Shoichiro Suda<sup>5</sup>, and Junichi Tanaka<sup>5,\*</sup>

<sup>1</sup> *Graduate School of Engineering and Science, University of the Ryukyus, Nishihara,  
Okinawa 903-0213, Japan*

<sup>2</sup> *OP Bio Factory Co., Ltd., Okinawa Life Science Center 107, 5-8 Suzaki, Uruma, Okinawa  
904-2234, Japan*

<sup>3</sup> *Central Research Center, AVSS Corporation, Nagasaki 852-8137, Japan*

<sup>4</sup> *Department of Molecular Engineering, Kyoto University, Kyoto 615-8510, Japan*

<sup>5</sup> *Department of Chemistry, Biology and Marine Science, University of the Ryukyus,  
Nishihara, Okinawa 903-0213, Japan*

Email: [jtanaka@sci.u-ryukyu.ac.jp](mailto:jtanaka@sci.u-ryukyu.ac.jp)

## Table of Contents

| Title                                                                                     | Page  |
|-------------------------------------------------------------------------------------------|-------|
| Table S1. Figure S1. Calculated data and geometries for k01 isomer                        | 3     |
| Table S2. Figure S2. Calculated data and geometries for k02 isomer                        | 4     |
| Table S3. Figure S3. Calculated data and geometries for k03 isomer                        | 5     |
| Table S4. Figure S4. Calculated data and geometries for k04 isomer                        | 6     |
| Table S5. Figure S5. Calculated data and geometries for k05 isomer                        | 7     |
| Table S6. Figure S6. Calculated data and geometries for k06 isomer                        | 8     |
| Table S7. Figure S7. Calculated data and geometries for k07 isomer                        | 9     |
| Table S8. Figure S8. Calculated data and geometries for k08 isomer                        | 10    |
| Table S9. Figure S9. Calculated data and geometries for k09 isomer                        | 11    |
| Table S10. Figure S10. Calculated data and geometries for k10 isomer                      | 12    |
| Table S11. Figure S11. Calculated data and geometries for k11 isomer                      | 13    |
| Table S12. Figure S12. Calculated data and geometries for k12 isomer                      | 14    |
| Table S13. Figure S13. Calculated data and geometries for k13 isomer                      | 15    |
| Table S14. Figure S14. Calculated data and geometries for k14 isomer                      | 16    |
| Table S15. Figure S15. Calculated data and geometries for k15 isomer                      | 17    |
| Table S16. Figure S16. Calculated data for and geometries k16 isomer                      | 18    |
| Table S17. NMR data of portimine ( <b>1</b> )                                             | 19    |
| Figure S17. <sup>1</sup> H NMR spectrum of portimine ( <b>1</b> )                         | 20    |
| Figure S18. <sup>13</sup> C NMR spectrum of portimine ( <b>1</b> )                        | 21    |
| Figure S19. HRESIMS of portimine ( <b>1</b> )                                             | 22    |
| Figure S20. UV spectrum of portimine ( <b>1</b> )                                         | 23    |
| Figure S21. FTIR spectrum of portimine ( <b>1</b> )                                       | 24    |
| Figure S22. <sup>1</sup> H NMR spectrum of kabirimine ( <b>2</b> )                        | 25    |
| Figure S23. <sup>13</sup> C NMR spectrum of kabirimine ( <b>2</b> )                       | 26    |
| Figure S24. DEPT spectra of kabirimine ( <b>2</b> )                                       | 27    |
| Figure S25. COSY spectrum of kabirimine ( <b>2</b> )                                      | 28    |
| Figure S26. HSQC spectrum of kabirimine ( <b>2</b> )                                      | 29    |
| Figure S27. HMBC spectrum of kabirimine ( <b>2</b> )                                      | 30    |
| Figure S28. NOESY spectrum of kabirimine ( <b>2</b> )                                     | 31    |
| Figure S29. TOCSY spectrum of kabirimine ( <b>2</b> )                                     | 32    |
| Figure S30. HRESIMS spectrum of kabirimine ( <b>2</b> )                                   | 33    |
| Figure S31. UV spectrum of kabirimine ( <b>2</b> )                                        | 34    |
| Figure S32. FTIR spectrum of kabirimine ( <b>2</b> )                                      | 35    |
| Figure S33. Evaluation of anti-RSV activities and cytotoxicities of <b>1</b> and <b>2</b> | 36    |
| Figure S34. A stable conformation for each model structure A-D                            | 37    |
| X-ray structure report for portimine                                                      | 38-67 |
| Table S18. Atomic coordinates and B <sub>iso</sub> /B <sub>eq</sub>                       | 47    |
| Table S19. Atomic coordinates and B <sub>iso</sub> involving hydrogen atoms               | 48    |
| Table S20. Anisotropic displacement parameters                                            | 49    |
| Table S21. Bond lengths                                                                   | 50    |
| Table S22. Bond lengths involving hydrogens                                               | 51    |
| Table S23. Bond angles                                                                    | 52    |
| Table S24. Bond angles involving hydrogens                                                | 53    |
| Table S25. Torsion angles                                                                 | 54-55 |
| Table S26. Possible hydrogen bonds                                                        | 56    |
| Table S27. Intramolecular contacts less than 3.60 Å                                       | 57    |
| Table S28. Intramolecular contacts less than 3.60 Å involving hydrogens                   | 58-61 |
| Table S29. Intermolecular contacts less than 3.60 Å                                       | 62    |
| Table S30. Intermolecular contacts less than 3.60 Å involving hydrogens                   | 63-67 |

**Table S1.** Calculated dihedral angles,<sup>1</sup> free energies,<sup>2</sup> equilibrium populations, and optical rotation values of ten lowest free energy conformations of k01 isomer, (3*S*, 4*R*, 8*R*, 11*R*, 13*R*, 14*R*, 15*R*, 16*R*, 18*S*).

| Conf.    | D1    | D2    | D3   | D4    | D5    | D6    | D7     | D8     | $\Delta G$ | P(%) | $[\alpha]_D$ |
|----------|-------|-------|------|-------|-------|-------|--------|--------|------------|------|--------------|
| <b>a</b> | 179.5 | 38.9  | 4.4  | -14.8 | 68.3  | -32.6 | -167.6 | 174.6  | 0.00       | 77.2 | +129.3       |
| <b>b</b> | 177.0 | 41.5  | 15.7 | 24.8  | 162.9 | -14.4 | -70.1  | -79.3  | 1.38       | 7.6  | +5.7         |
| <b>c</b> | 177.1 | 39.5  | 13.0 | 25.7  | 66.3  | -29.7 | -168.9 | 167.7  | 1.62       | 5.1  | -32.4        |
| <b>d</b> | 179.5 | 43.0  | 4.2  | -14.6 | 67.8  | 21.0  | -170.1 | -178.1 | 1.69       | 4.6  | +116.6       |
| <b>e</b> | 179.6 | 39.2  | 4.1  | -23.4 | 168.8 | -19.3 | -73.0  | -71.4  | 2.03       | 2.6  | +106.2       |
| <b>f</b> | -34.2 | 38.9  | 4.9  | -15.2 | 68.2  | -32.6 | -167.6 | 175.0  | 2.76       | 0.8  | +171.3       |
| <b>g</b> | 33.7  | 38.9  | 3.6  | -14.5 | 68.5  | -32.6 | -167.6 | 174.2  | 2.86       | 0.6  | -53.9        |
| <b>h</b> | 179.3 | 36.2  | 5.6  | -12.3 | 149.8 | 0.9   | -45.9  | 173.9  | 2.97       | 0.5  | +42.3        |
| <b>i</b> | 179.5 | 38.1  | 3.5  | -14.2 | 160.8 | 33.9  | -163.8 | 156.4  | 3.26       | 0.3  | +85.7        |
| <b>j</b> | 179.6 | 171.5 | 4.0  | -14.9 | 67.9  | -27.1 | -169.5 | -179.8 | 4.02       | 0.1  | +101.4       |
|          |       |       |      |       |       |       |        |        | Average    |      | +108.5       |

<sup>1</sup>D1: C19C20C23C24, D2: C14C15OH, D3: C19C20C21C22, D4: C4C5NC1, D5: C5C6C7C8, D6: C8C9C10C11, D7: C10C11C12C13, D8: C15C16C17C18. Units in degrees. <sup>2</sup>Units in kcal/mol.

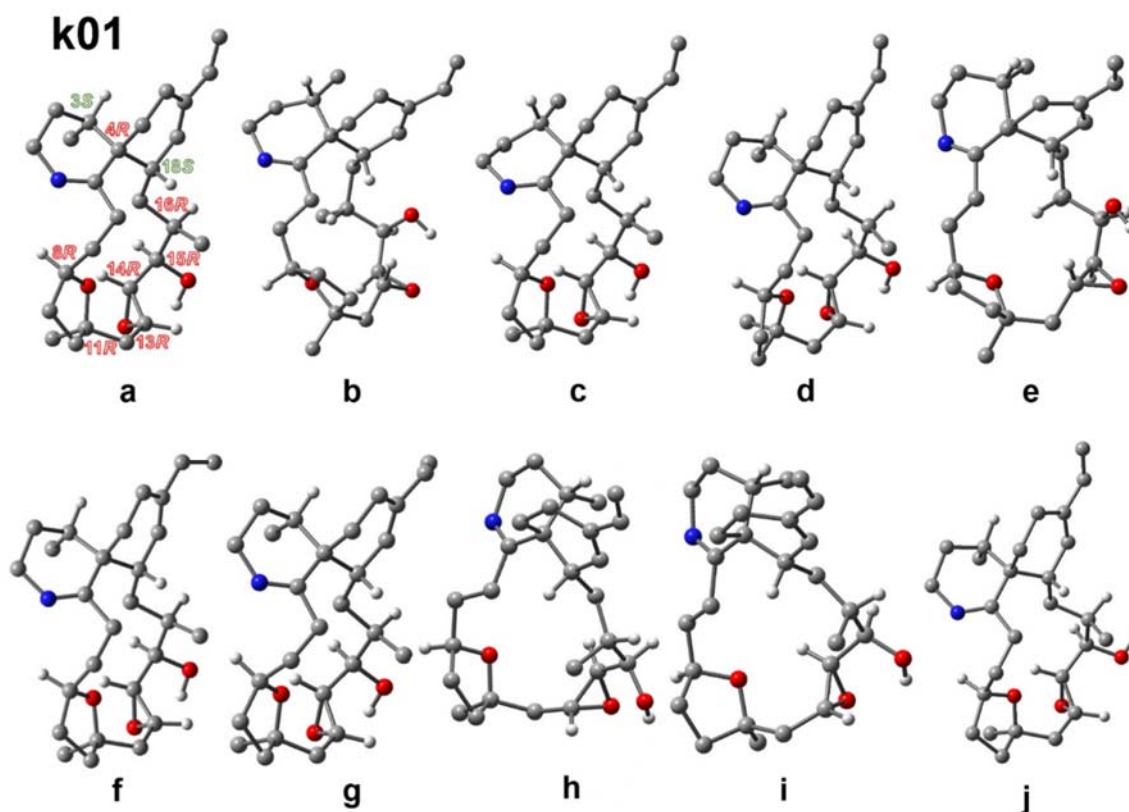

**Figure S1.** Calculated geometries of ten lowest free energy conformations of k01 isomer, (3*S*, 4*R*, 8*R*, 11*R*, 13*R*, 14*R*, 15*R*, 16*R*, 18*S*).

**Table S2.** Calculated dihedral angles,<sup>1</sup> free energies,<sup>2</sup> equilibrium populations, and optical rotation values of ten lowest free energy conformations of k02 isomer, (3*S*, 4*R*, 8*R*, 11*R*, 13*R*, 14*R*, 15*R*, 16*S*, 18*S*).

| Conf. | D1     | D2   | D3    | D4    | D5    | D6    | D7     | D8     | $\Delta G$ | P(%) | $[\alpha]_D$ |
|-------|--------|------|-------|-------|-------|-------|--------|--------|------------|------|--------------|
| a     | 179.3  | 38.7 | 4.4   | -12.6 | 70.0  | -33.4 | -167.1 | 168    | 0.00       | 73.7 | +105.3       |
| b     | 179.3  | 44.1 | 4.9   | -11.9 | 67.6  | 31.2  | -168.8 | 173.1  | 1.34       | 7.8  | +78.0        |
| c     | 179.3  | 40.1 | 4.5   | -11.6 | 144.6 | 21.6  | -45.8  | 174.7  | 1.75       | 3.9  | -2.5         |
| d     | 179.1  | 37.4 | 6.4   | -8.5  | 59.4  | -21.9 | -79.0  | -179.6 | 1.98       | 2.7  | +100.7       |
| e     | 179.4  | 35.5 | 5.8   | -17.4 | 170.5 | 34.6  | -166.5 | 134.0  | 2.11       | 2.2  | +35.1        |
| f     | -178   | 38.4 | -45.0 | -18.2 | 70.5  | -33.8 | -167.2 | 168.4  | 2.56       | 1.0  | +84.1        |
| g     | 179.2  | 33.6 | 5.4   | -10.4 | 61.2  | 27.1  | -147.4 | -175.7 | 2.59       | 1.0  | +99.4        |
| h     | -34.7  | 38.6 | 5.0   | -13.0 | 70.0  | -33.5 | -167.1 | 168.5  | 2.66       | 0.9  | +141.1       |
| i     | 177.1  | 37.3 | 13.9  | 19.5  | -55.4 | 14.9  | -71.1  | -177.7 | 2.70       | 0.8  | -88.6        |
| j     | -177.3 | 38.0 | -14.7 | -0.5  | 58.8  | -35.1 | -178.7 | 83.6   | 2.71       | 0.8  | +202.8       |
|       |        |      |       |       |       |       |        |        | Average    |      | +95.8        |

<sup>1</sup>D1: C19C20C23C24, D2: C14C15OH, D3: C19C20C21C22, D4: C4C5NC1, D5: C5C6C7C8, D6: C8C9C10C11, D7: C10C11C12C13, D8: C15C16C17C18. Units in degrees. <sup>2</sup>Units in kcal/mol.

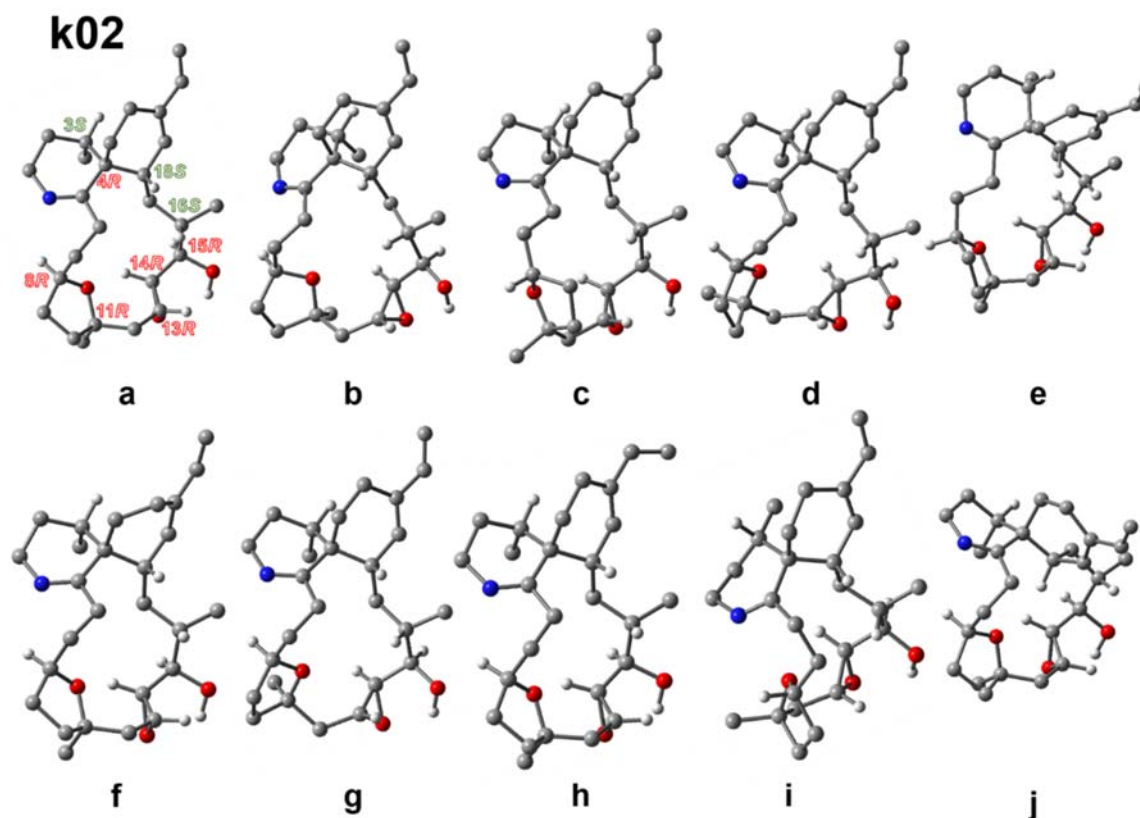

**Figure S2.** Calculated geometries of ten lowest free energy conformations of k02 isomer, (3*S*, 4*R*, 8*R*, 11*R*, 13*R*, 14*R*, 15*R*, 16*S*, 18*S*).

**Table S3.** Calculated dihedral angles,<sup>1</sup> free energies,<sup>2</sup> equilibrium populations, and optical rotation values of ten lowest free energy conformations of k03 isomer, (3*S*, 4*R*, 8*R*, 11*R*, 13*R*, 14*R*, 15*S*, 16*R*, 18*S*).

| Conf. | D1    | D2     | D3   | D4    | D5    | D6    | D7     | D8    | $\Delta G$ | P(%) | $[\alpha]_D$ |
|-------|-------|--------|------|-------|-------|-------|--------|-------|------------|------|--------------|
| a     | 179.7 | -51.6  | 3.9  | -14.9 | 67.7  | -28.8 | -168.0 | 177.0 | 0.00       | 53.7 | +137.6       |
| b     | 177.4 | -45    | 14.9 | 22.4  | 157.4 | 21.1  | -65.1  | -73.4 | 0.69       | 17.0 | -140.2       |
| c     | 179.7 | -54.9  | 4.3  | -21.9 | 171.4 | -19   | -73.2  | -55.4 | 0.91       | 11.8 | +92.1        |
| d     | 179.4 | 37.2   | 3.2  | -15.4 | 158.7 | 27.5  | -48.2  | 69.0  | 1.40       | 5.2  | +40.9        |
| e     | 177.5 | 24.4   | 14.3 | 20.9  | 156   | -15.4 | -49.7  | -68.1 | 1.58       | 3.8  | -151.2       |
| f     | 178.9 | -53.5  | 8.5  | -7.3  | 176.2 | -26.0 | -77.9  | -49.1 | 2.31       | 1.1  | +101.8       |
| g     | 179.6 | -176.4 | 3.8  | -15.0 | 67.0  | -31.7 | -169.4 | 178.4 | 2.44       | 0.9  | +173.0       |
| h     | -34.1 | -51.7  | 4.5  | -15.3 | 67.6  | -28.8 | -168   | 177.3 | 2.61       | 0.7  | +168.8       |
| i     | 33.5  | -51.7  | 3.1  | -14.7 | 67.9  | -29.0 | -168.0 | 176.4 | 2.68       | 0.6  | -57.8        |
| j     | 176.9 | 56.7   | 15.4 | 25.1  | 164.3 | -15.4 | -70.8  | -65.9 | 2.83       | 0.5  | +6.3         |
|       |       |        |      |       |       |       |        |       | Average    |      | +59.9        |

<sup>1</sup>D1: C19C20C23C24, D2: C14C15OH, D3: C19C20C21C22, D4: C4C5NC1, D5: C5C6C7C8, D6: C8C9C10C11, D7: C10C11C12C13, D8: C15C16C17C18. Units in degrees. <sup>2</sup>Units in kcal/mol.

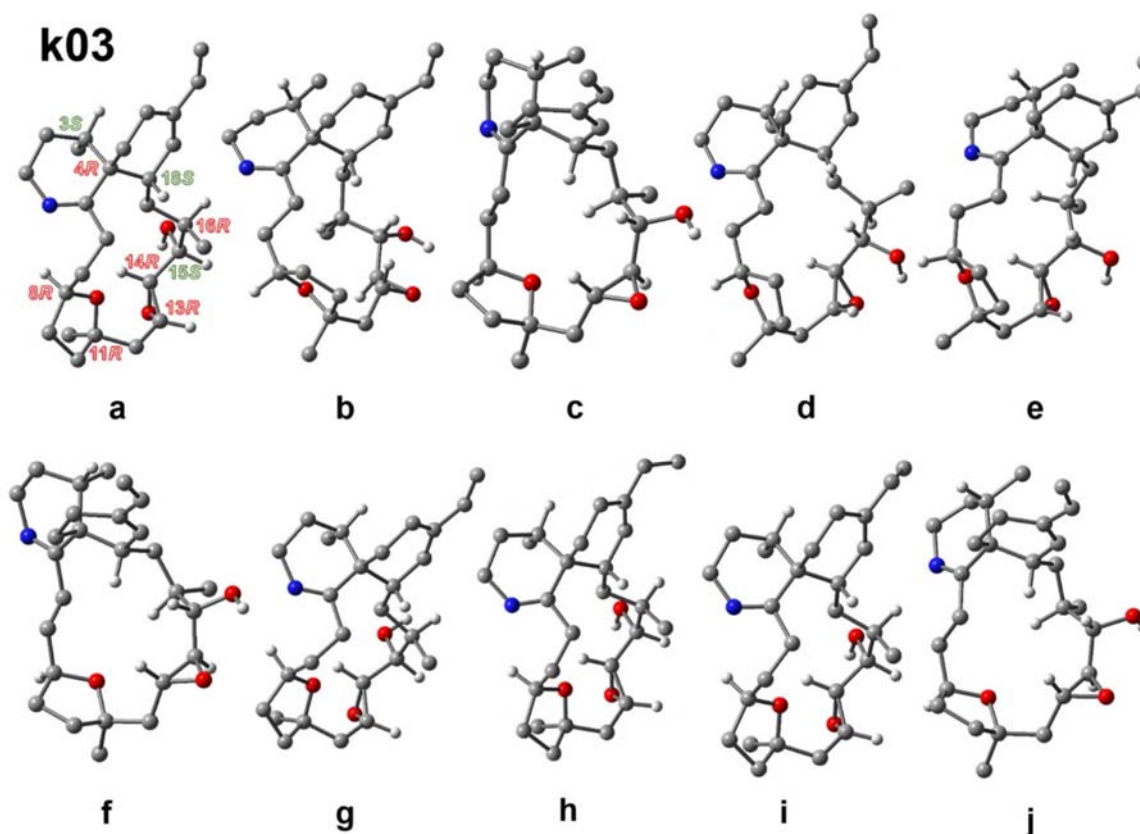

**Figure S3.** Calculated geometries of ten lowest free energy conformations of k03 isomer, (3*S*, 4*R*, 8*R*, 11*R*, 13*R*, 14*R*, 15*S*, 16*R*, 18*S*).

**Table S4.** Calculated dihedral angles,<sup>1</sup> free energies,<sup>2</sup> equilibrium populations, and optical rotation values of ten lowest free energy conformations of k04 isomer, (3*S*, 4*R*, 8*R*, 11*R*, 13*R*, 14*R*, 15*S*, 16*S*, 18*S*).

| Conf.   | D1     | D2    | D3    | D4    | D5    | D6    | D7     | D8    | $\Delta G$ | P(%) | $[\alpha]_D$ |
|---------|--------|-------|-------|-------|-------|-------|--------|-------|------------|------|--------------|
| a       | 179.1  | 31.7  | 5.9   | -13.2 | 163.6 | 25.5  | -50.0  | 72.0  | 0.00       | 72.9 | +80.7        |
| b       | 179.4  | -52.9 | 4.4   | -12.6 | 70.0  | -32.7 | -165.8 | 167.6 | 1.29       | 8.3  | +107.4       |
| c       | 177.1  | 31.1  | 13.0  | 24.4  | 149.0 | 22.8  | -49.2  | 65.9  | 1.56       | 5.3  | -128.0       |
| d       | 177.5  | 28.6  | 13.0  | 19.4  | 68.2  | -32.1 | -163.6 | 55.3  | 1.88       | 3.1  | +15.1        |
| e       | 179.4  | -49.6 | 4.9   | -12.7 | 68.7  | 29.3  | -168.2 | 170.4 | 2.21       | 1.8  | +80.0        |
| f       | 179.0  | 27.1  | 7.0   | -13.3 | 70.3  | 28.9  | -164.4 | 72.8  | 2.63       | 0.9  | +173.1       |
| g       | -178.1 | 30.7  | -46.8 | 17.1  | 68.3  | -30.4 | -163.7 | 53.5  | 2.68       | 0.8  | -61.0        |
| h       | -34.6  | 31.7  | 6.5   | -13.9 | 163.6 | 25.3  | -50.0  | 72.2  | 2.71       | 0.8  | +162.1       |
| i       | 179.1  | -38.5 | 6.0   | -11.7 | 67.5  | -34.6 | -85.4  | 85.1  | 2.76       | 0.7  | +239.0       |
| j       | 34.3   | 31.9  | 5.0   | -12.9 | 163.5 | 25.3  | -50.1  | 71.8  | 2.79       | 0.7  | -63.5        |
| Average |        |       |       |       |       |       |        |       |            |      | +68.7        |

<sup>1</sup>D1: C19C20C23C24, D2: C14C15OH, D3: C19C20C21C22, D4: C4C5NC1, D5: C5C6C7C8, D6: C8C9C10C11, D7: C10C11C12C13, D8: C15C16C17C18. Units in degrees. <sup>2</sup>Units in kcal/mol.

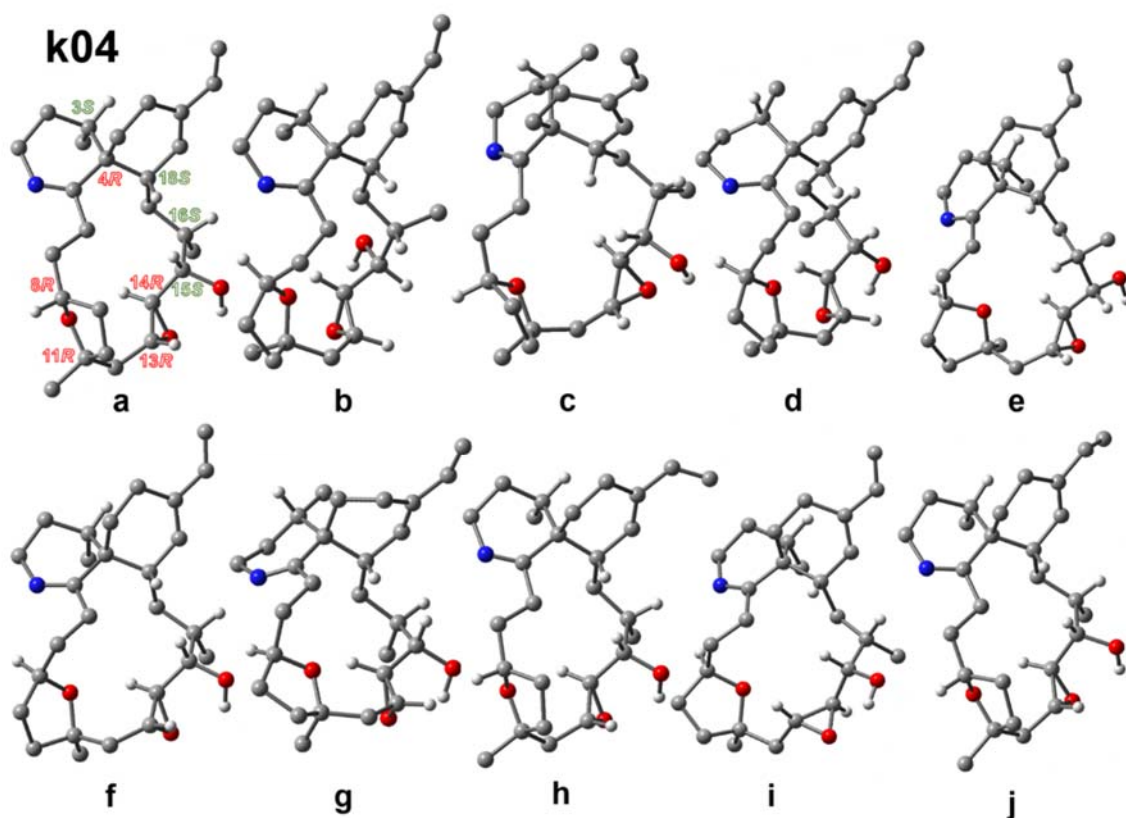

**Figure S4.** Calculated geometries of ten lowest free energy conformations of k04 isomer, (3*S*, 4*R*, 8*R*, 11*R*, 13*R*, 14*R*, 15*S*, 16*S*, 18*S*).

**Table S5.** Calculated dihedral angles,<sup>1</sup> free energies,<sup>2</sup> equilibrium populations, and optical rotation values of ten lowest free energy conformations of k05 isomer, (3*S*, 4*R*, 8*R*, 11*R*, 13*S*, 14*S*, 15*R*, 16*R*, 18*S*).

| Conf.   | D1    | D2    | D3   | D4    | D5     | D6    | D7     | D8     | $\Delta G$ | P(%) | $[\alpha]_D$ |
|---------|-------|-------|------|-------|--------|-------|--------|--------|------------|------|--------------|
| a       | 179.2 | 46.6  | 5.5  | -11.8 | 59.7   | 17.3  | -173.9 | 176.5  | 0.00       | 91.0 | +212.9       |
| b       | 177.4 | 48.9  | 13.2 | 19.3  | -49.1  | 34.0  | -159.8 | 175.7  | 2.38       | 1.7  | -51.8        |
| c       | 177.2 | 54.6  | 15.4 | 23.1  | 156.9  | 27.1  | -164.1 | -62.8  | 2.46       | 1.5  | +7.8         |
| d       | 177.0 | 46.4  | 13.2 | 27.1  | 59.1   | 13.7  | -174.9 | 170.8  | 2.50       | 1.4  | +46.1        |
| e       | -34.2 | 46.6  | 6.1  | -12.1 | 59.7   | 17.3  | -173.9 | 176.7  | 2.67       | 1.0  | +229.8       |
| f       | 33.8  | 46.5  | 4.7  | -11.4 | 59.8   | 17.5  | -173.8 | 176.2  | 2.78       | 0.9  | +3.6         |
| g       | 179.7 | 54.5  | 4.8  | -24.3 | 164.9  | 29.9  | -162.6 | -57.4  | 3.08       | 0.5  | +54.0        |
| h       | 178.8 | 54.1  | 9.6  | -7.1  | -173.1 | 29.6  | -170.3 | -57.1  | 3.19       | 0.4  | +71.6        |
| i       | 179.3 | 176.6 | 5.3  | -11.2 | 57.8   | 16.1  | -171.5 | -174.3 | 3.27       | 0.4  | +202.3       |
| j       | 178.9 | 55.4  | 8.2  | -7.0  | -164.5 | -24.2 | -163.5 | -58.8  | 3.33       | 0.3  | +112.9       |
| Average |       |       |      |       |        |       |        |        |            |      | +197.8       |

<sup>1</sup>D1: C19C20C23C24, D2: C14C15OH, D3: C19C20C21C22, D4: C4C5NC1, D5: C5C6C7C8, D6: C8C9C10C11, D7: C10C11C12C13, D8: C15C16C17C18. Units in degrees. <sup>2</sup>Units in kcal/mol.

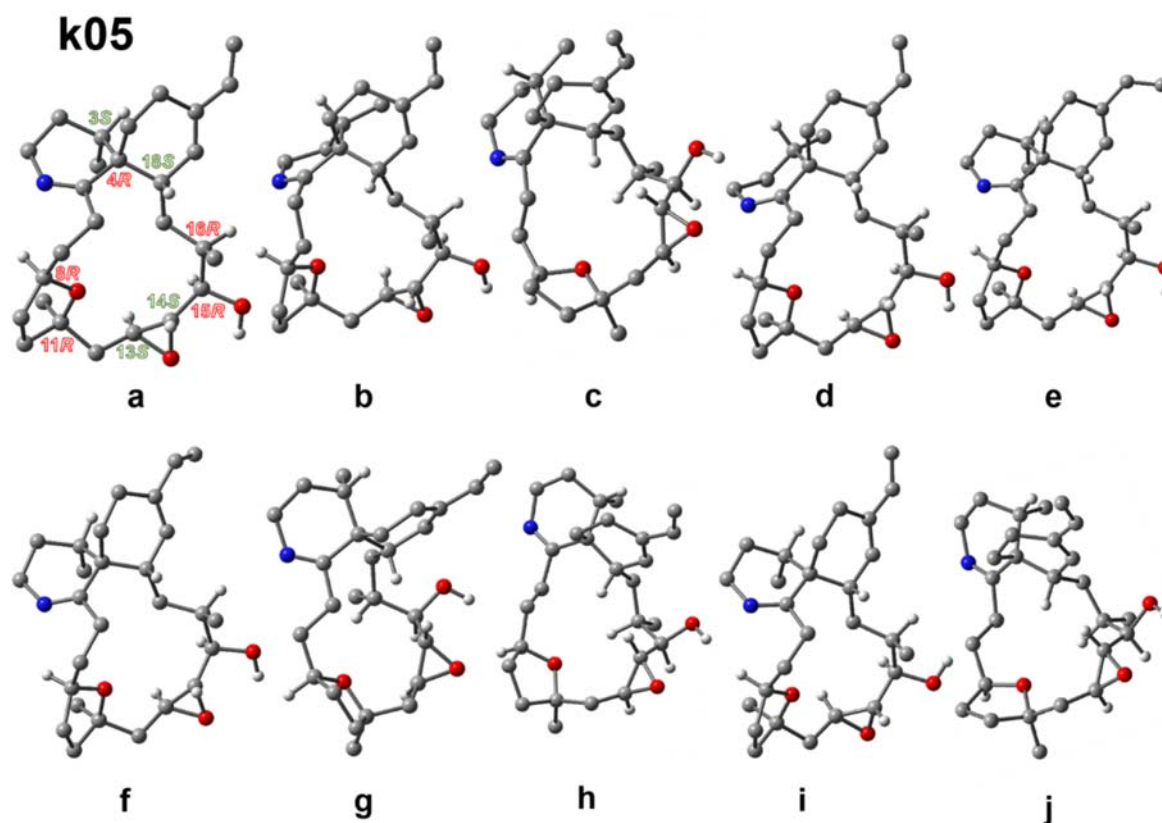

**Figure S5.** Calculated geometries of ten lowest free energy conformations of k05 isomer, (3*S*, 4*R*, 8*R*, 11*R*, 13*S*, 14*S*, 15*R*, 16*R*, 18*S*).

**Table S6.** Calculated dihedral angles,<sup>1</sup> free energies,<sup>2</sup> equilibrium populations, and optical rotation values of ten lowest free energy conformations of k06 isomer, (3*S*, 4*R*, 8*R*, 11*R*, 13*S*, 14*S*, 15*R*, 16*S*, 18*S*).

| Conf.   | D1     | D2    | D3    | D4    | D5     | D6    | D7     | D8    | $\Delta G$ | P(%) | $[\alpha]_D$ |
|---------|--------|-------|-------|-------|--------|-------|--------|-------|------------|------|--------------|
| a       | 177.3  | -28.3 | 12.9  | 20.8  | 65.5   | -33.3 | -175.0 | 121.5 | 0.00       | 28.8 | +1.2         |
| b       | 179.3  | -32.4 | 4.9   | -14.9 | -179.3 | 34.2  | -163.5 | 100.8 | 0.16       | 22.1 | +86.3        |
| c       | 177.4  | -35.4 | 11.2  | 20.3  | 157.1  | 31.1  | -164   | 91.8  | 0.52       | 12.1 | -46.7        |
| d       | 179.5  | -22.5 | 5.5   | -18.3 | 72.1   | -34.1 | -172.6 | 133.2 | 0.96       | 5.8  | +144.1       |
| e       | 176.8  | 51.2  | 12.9  | 23.6  | 62.4   | -32.7 | -172.9 | 53.5  | 1.20       | 3.9  | +93.7        |
| f       | 179.8  | 53.0  | 1.1   | -19.9 | 68.7   | -34.2 | -171.2 | 57.6  | 1.33       | 3.1  | +231.3       |
| g       | -177.4 | 42.4  | -13.9 | 1.7   | 56.1   | -28.2 | -179.3 | 74.6  | 1.36       | 2.9  | +198.8       |
| h       | -177.4 | -26.3 | -15.1 | 1.8   | 62.7   | -27.0 | 178.5  | 64.0  | 1.39       | 2.8  | +227.3       |
| i       | -178.0 | -31.3 | -47.2 | 17.6  | 65.6   | -33.7 | -175.3 | 112.4 | 1.44       | 2.6  | -91.9        |
| j       | -177.0 | 48.9  | -14.2 | 4.8   | 151.2  | 35.3  | -167.3 | 59.5  | 1.46       | 2.5  | +140.9       |
| Average |        |       |       |       |        |       |        |       |            |      | +51.28       |

<sup>1</sup>D1: C19C20C23C24, D2: C14C15OH, D3: C19C20C21C22, D4: C4C5NC1, D5: C5C6C7C8, D6: C8C9C10C11, D7: C10C11C12C13, D8: C15C16C17C18. Units in degrees. <sup>2</sup>Units in kcal/mol.

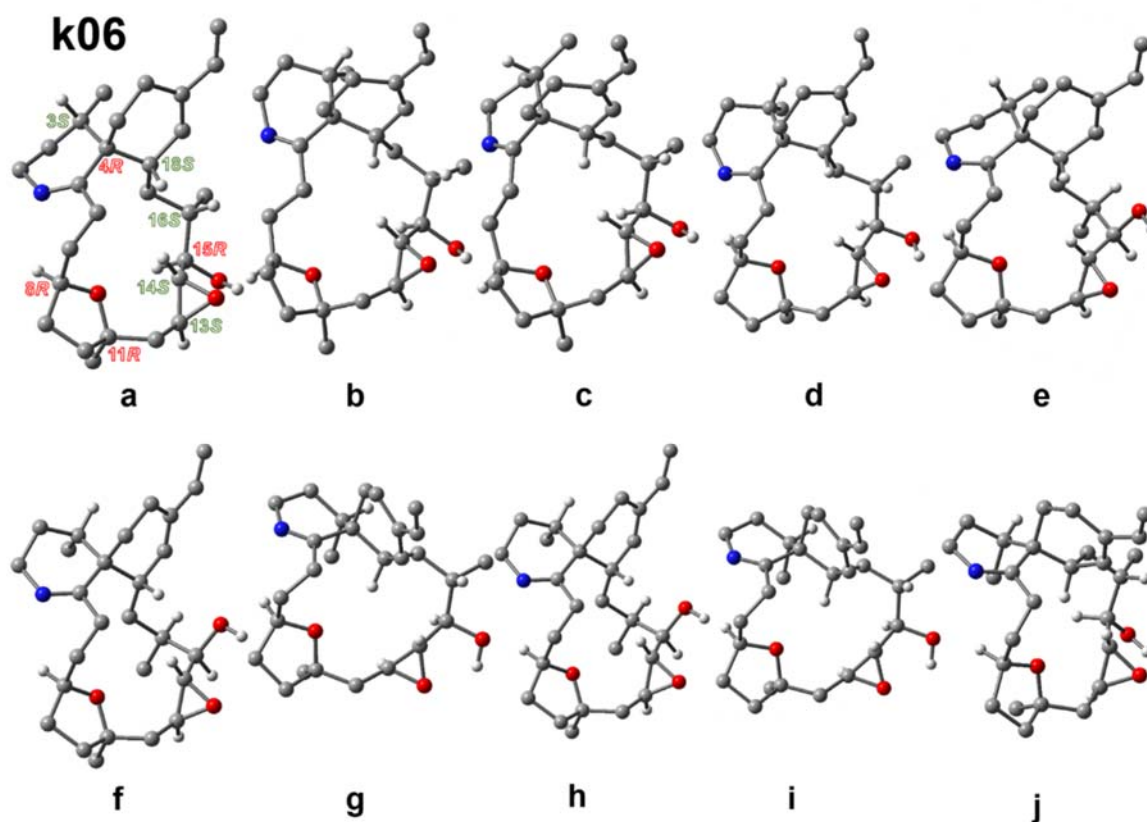

**Figure S6.** Calculated geometries of ten lowest free energy conformations of k06 isomer, (3*S*, 4*R*, 8*R*, 11*R*, 13*S*, 14*S*, 15*R*, 16*S*, 18*S*).



**Table S7.** Calculated dihedral angles,<sup>1</sup> free energies,<sup>2</sup> equilibrium populations, and optical rotation values of ten lowest free energy conformations of k07 isomer, (3*S*, 4*R*, 8*R*, 11*R*, 13*S*, 14*S*, 15*S*, 16*R*, 18*S*).

| Conf.   | D1     | D2    | D3    | D4    | D5    | D6    | D7     | D8     | $\Delta G$ | P(%) | $[\alpha]_D$ |
|---------|--------|-------|-------|-------|-------|-------|--------|--------|------------|------|--------------|
| a       | 179.4  | -43.1 | 5.2   | -11.2 | 57.7  | 16.6  | -170.3 | -177.8 | 0.00       | 92.5 | +236.7       |
| b       | 177.5  | -42.3 | 13.7  | 19.4  | -48.8 | 33.4  | -157.7 | 177.9  | 2.27       | 2.1  | -34.5        |
| c       | 177.1  | -44.3 | 13.5  | 26.8  | 58.2  | 12.6  | -171.9 | 174.2  | 2.74       | 0.9  | +65.3        |
| d       | -34.1  | -43.2 | 6.0   | -11.5 | 57.6  | 16.8  | -170.4 | -177.5 | 2.85       | 0.8  | +243.0       |
| e       | 33.6   | -43.2 | 4.6   | -10.8 | 57.8  | 16.9  | -170.3 | -178.3 | 2.91       | 0.7  | +13.8        |
| f       | 177.1  | -36.9 | 13.5  | 22.8  | 61.9  | -31.0 | -173.7 | 41.7   | 3.00       | 0.6  | +70.0        |
| g       | -177.4 | -36.5 | -17.5 | -1.5  | 59.6  | -26.5 | 178.9  | -67.0  | 3.38       | 0.3  | +222.6       |
| h       | -179.9 | -36.1 | 1.0   | -21.2 | 68.3  | -33.8 | -171.6 | 46.2   | 3.42       | 0.3  | +196.6       |
| i       | -178   | -41.8 | -46.6 | 16.1  | -51.2 | 30.9  | -158.2 | 175.4  | 3.59       | 0.2  | -80.4        |
| j       | 177.2  | -37.9 | 14.1  | 22.0  | 154.3 | 26.1  | -165.1 | -58.7  | 3.60       | 0.2  | +12.9        |
| Average |        |       |       |       |       |       |        |        |            |      | +223.8       |

<sup>1</sup>D1: C19C20C23C24, D2: C14C15OH, D3: C19C20C21C22, D4: C4C5NC1, D5: C5C6C7C8, D6: C8C9C10C11, D7: C10C11C12C13, D8: C15C16C17C18. Units in degrees. <sup>2</sup>Units in kcal/mol.

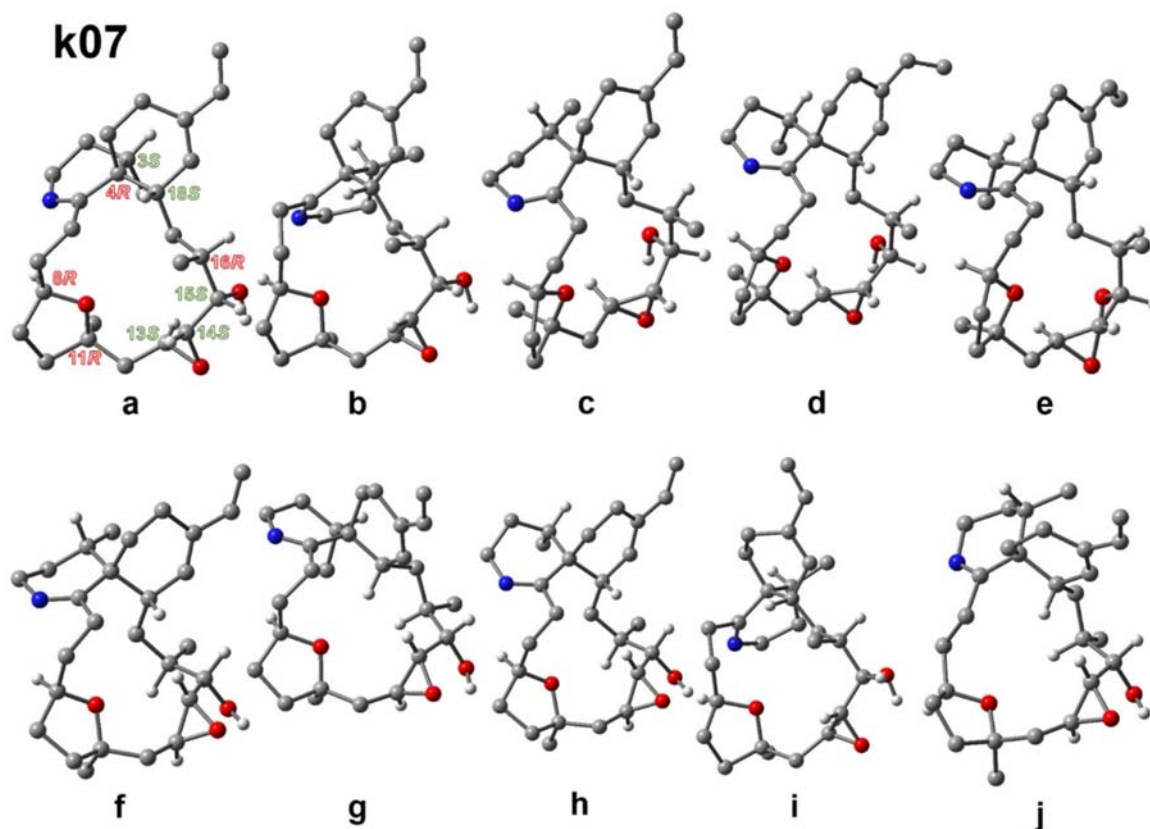

**Figure S7.** Calculated geometries of ten lowest free energy conformations of k07 isomer, (3*S*, 4*R*, 8*R*, 11*R*, 13*S*, 14*S*, 15*S*, 16*R*, 18*S*).

**Table S8.** Calculated dihedral angles,<sup>1</sup> free energies,<sup>2</sup> equilibrium populations, and optical rotation values of ten lowest free energy conformations of k08 isomer, (3*S*, 4*R*, 8*R*, 11*R*, 13*S*, 14*S*, 15*S*, 16*S*, 18*S*).

| Conf.   | D1     | D2    | D3   | D4    | D5     | D6    | D7     | D8   | $\Delta G$ | P(%) | $[\alpha]_D$ |
|---------|--------|-------|------|-------|--------|-------|--------|------|------------|------|--------------|
| a       | 177.1  | -35.0 | 12.1 | 22.9  | 62.3   | -32.1 | -170.8 | 47.4 | 0.00       | 38.4 | +103.3       |
| b       | -179.9 | -34.2 | 0.8  | -20.3 | 69.3   | -34.3 | -169.4 | 52.9 | 0.16       | 29.3 | +224.6       |
| c       | 177.4  | -23.8 | 11.9 | 19.8  | 161.6  | 30.6  | -159.1 | 75.2 | 0.60       | 14.0 | -39.3        |
| d       | 179.1  | -19.2 | 6.2  | -14.0 | -174.2 | 34.1  | -160.3 | 85.2 | 0.64       | 13.0 | +106.3       |
| e       | 179.8  | -28.4 | 2.2  | -18.6 | 66.0   | 30.5  | -172.1 | 67.5 | 2.02       | 1.3  | +217.6       |
| f       | 179.9  | -37.9 | 0.1  | -13.9 | 165.6  | 32.9  | -164.2 | 37.8 | 2.15       | 1.1  | +211.2       |
| g       | 179.3  | -39.4 | 5.0  | -13.9 | 163.1  | 11.7  | -55.7  | 48.5 | 2.68       | 0.4  | +135.3       |
| h       | -34.1  | -34.8 | 13.8 | 23.0  | 62.4   | -32.2 | -170.8 | 47.3 | 2.77       | 0.4  | +149.5       |
| i       | -34.6  | -34   | 1.3  | -20.4 | 69.4   | -34.3 | -169.4 | 53.0 | 2.88       | 0.3  | +278.4       |
| j       | 179.1  | 46.6  | 5.9  | -12.1 | 62.6   | 29.6  | -157.1 | 83.0 | 3.05       | 0.2  | +197.8       |
| Average |        |       |      |       |        |       |        |      |            |      | +121.8       |

<sup>1</sup>D1: C19C20C23C24, D2: C14C15OH, D3: C19C20C21C22, D4: C4C5NC1, D5: C5C6C7C8, D6: C8C9C10C11, D7: C10C11C12C13, D8: C15C16C17C18. Units in degrees. <sup>2</sup>Units in kcal/mol.

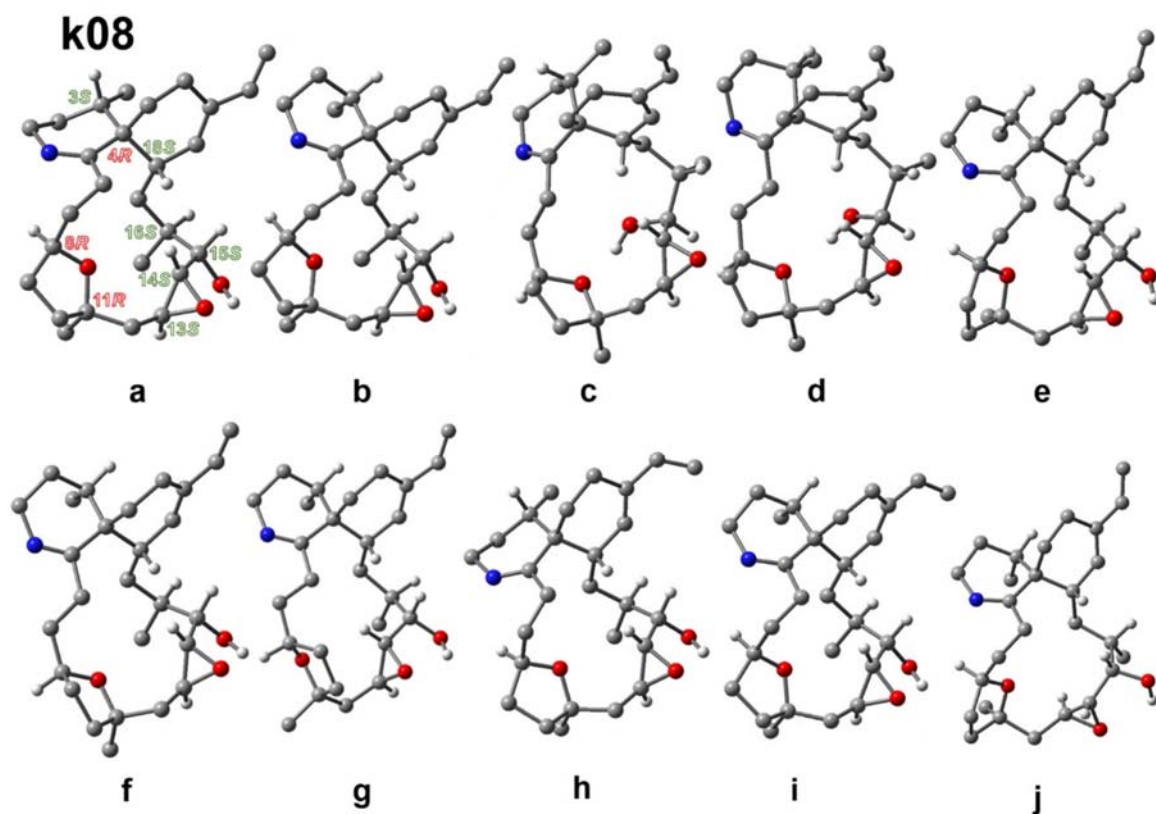

**Figure S8.** Calculated geometries of ten lowest free energy conformations of k08 isomer, (3*S*, 4*R*, 8*R*, 11*R*, 13*S*, 14*S*, 15*S*, 16*S*, 18*S*).

**Table S9.** Calculated dihedral angles,<sup>1</sup> free energies,<sup>2</sup> equilibrium populations, and optical rotation values of ten lowest free energy conformations of k09 isomer, (3*S*, 4*R*, 8*S*, 11*S*, 13*R*, 14*R*, 15*R*, 16*R*, 18*S*).

| Conf.   | D1    | D2   | D3   | D4    | D5    | D6    | D7    | D8     | $\Delta G$ | P(%) | $[\alpha]_D$ |
|---------|-------|------|------|-------|-------|-------|-------|--------|------------|------|--------------|
| a       | 179.8 | 39.5 | 1.8  | -15.6 | 165.9 | -32.7 | 170.2 | 175.8  | 0.00       | 75.6 | +121.7       |
| b       | 179.5 | 38.5 | 3.5  | -14.3 | 156.4 | 20.2  | 166.3 | -179.4 | 1.01       | 14.0 | +81.8        |
| c       | 177.1 | 39.4 | 11.4 | 24.0  | 152.8 | -33.1 | 172.9 | 164.6  | 1.66       | 4.7  | -10.9        |
| d       | 177.1 | 37.7 | 12.2 | 23.8  | 135.1 | 15.1  | 171.5 | 173.7  | 1.96       | 2.8  | -49.3        |
| e       | -34.4 | 39.4 | 2.1  | -15.9 | 165.7 | -32.7 | 170.1 | 176.1  | 2.61       | 1.0  | +197.5       |
| f       | 33.3  | 39.5 | 0.9  | -15.4 | 165.9 | -32.6 | 170.2 | 175.7  | 2.77       | 0.7  | -35.7        |
| g       | -34.2 | 38.5 | 4.0  | -14.7 | 155.9 | 20.0  | 166.4 | -179.0 | 3.59       | 0.2  | +140.9       |
| h       | 33.6  | 38.5 | 2.8  | -14.0 | 156.6 | 20.7  | 166.2 | -179.7 | 3.65       | 0.2  | -87.6        |
| i       | 177.1 | 30.1 | 13.0 | 21.9  | 161.1 | 33.6  | 161.7 | 71.4   | 3.85       | 0.1  | -95.5        |
| j       | 179.9 | 20.3 | 0.9  | -20.0 | 179.9 | -32.3 | 167.9 | 76.2   | 3.90       | 0.1  | +93.9        |
| Average |       |      |      |       |       |       |       |        |            |      | +103.0       |

<sup>1</sup>D1: C19C20C23C24, D2: C14C15OH, D3: C19C20C21C22, D4: C4C5NC1, D5: C5C6C7C8, D6: C8C9C10C11, D7: C10C11C12C13, D8: C15C16C17C18. Units in degrees. <sup>2</sup>Units in kcal/mol.

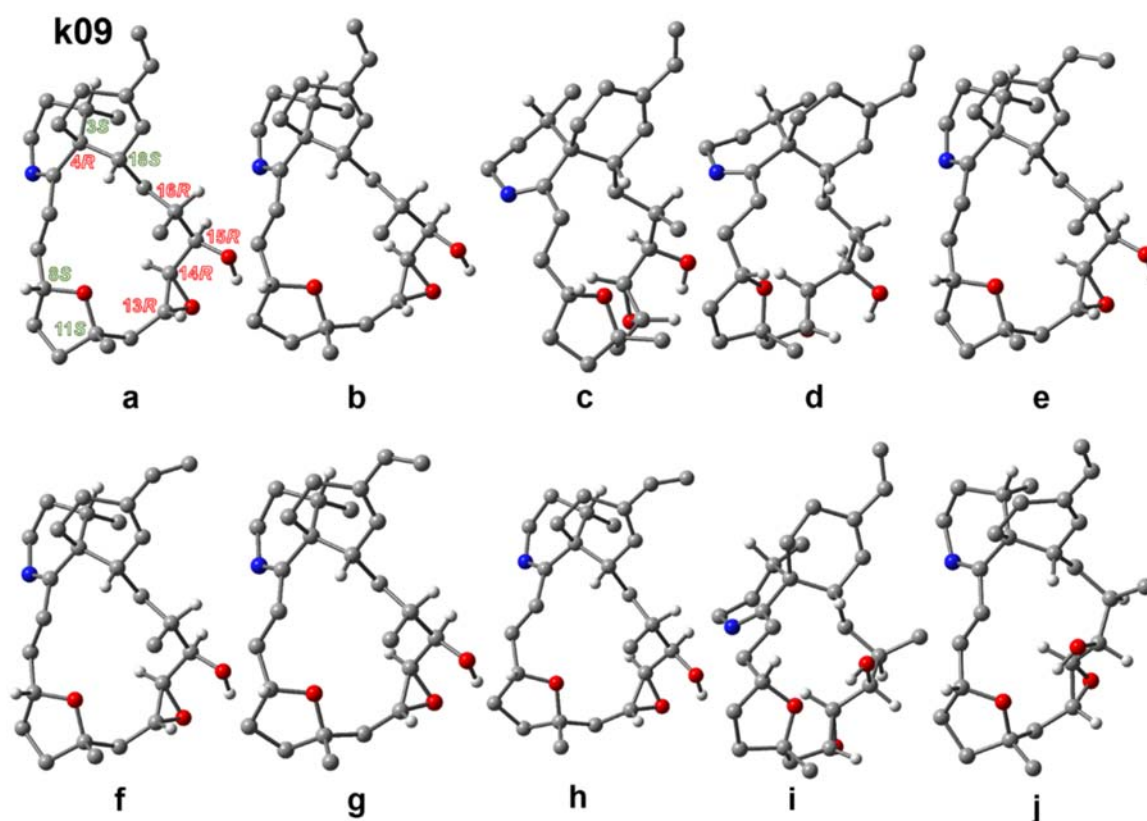

**Figure S9.** Calculated geometries of ten lowest free energy conformations of k09 isomer, (3*S*, 4*R*, 8*S*, 11*S*, 13*R*, 14*R*, 15*R*, 16*R*, 18*S*).

**Table S10.** Calculated dihedral angles,<sup>1</sup> free energies,<sup>2</sup> equilibrium populations, and optical rotation values of ten lowest free energy conformations of k10 isomer, (3*S*, 4*R*, 8*S*, 11*S*, 13*R*, 14*R*, 15*R*, 16*S*, 18*S*).

| Conf.   | D1    | D2   | D3   | D4    | D5     | D6     | D7    | D8    | $\Delta G$ | P(%) | $[\alpha]_D$ |
|---------|-------|------|------|-------|--------|--------|-------|-------|------------|------|--------------|
| a       | 179.7 | 42.5 | 1.8  | -15.2 | 171.7  | -33.1  | 170.7 | 171.0 | 0.00       | 47.0 | +84.6        |
| b       | 179.5 | 41.1 | 3.8  | -14.0 | 169.8  | 33.2   | 162.8 | 172.7 | 0.37       | 25.3 | +16.9        |
| c       | 179.8 | 13.5 | 1.8  | -18.0 | -179.7 | -33.5  | 166.6 | 82.9  | 1.03       | 8.4  | +109.9       |
| d       | -38.5 | 11.6 | 4.6  | -16.9 | -175.5 | -147.4 | -88.9 | 116.1 | 1.33       | 5.0  | +52.8        |
| e       | 177.2 | 16.7 | 11.5 | 21.9  | 167.3  | -32.7  | 170.1 | 72.5  | 1.46       | 4.1  | -53.4        |
| f       | 177.1 | 26.1 | 12.7 | 22.3  | 162.5  | 33.9   | 160.8 | 76.1  | 1.52       | 3.7  | -97.9        |
| g       | 177.1 | 41.4 | 11.3 | 23.5  | 158.0  | -34.1  | 173.8 | 159.7 | 2.09       | 1.4  | -38.7        |
| h       | 176.9 | 40.8 | 13.4 | 27.5  | 161.5  | 33.4   | 165.6 | 163.2 | 2.60       | 0.6  | -118.8       |
| i       | -34.6 | 42.5 | 2.3  | -15.6 | 171.7  | -33.2  | 170.6 | 171.3 | 2.65       | 0.6  | +158.0       |
| j       | 177.6 | 41.0 | 13.9 | 20.3  | 150.9  | -35.8  | 174.0 | 142.3 | 2.67       | 0.5  | -64.4        |
| Average |       |      |      |       |        |        |       |       |            |      | +49.13       |

<sup>1</sup>D1: C19C20C23C24, D2: C14C15OH, D3: C19C20C21C22, D4: C4C5NC1, D5: C5C6C7C8, D6: C8C9C10C11, D7: C10C11C12C13, D8: C15C16C17C18. Units in degrees. <sup>2</sup>Units in kcal/mol.

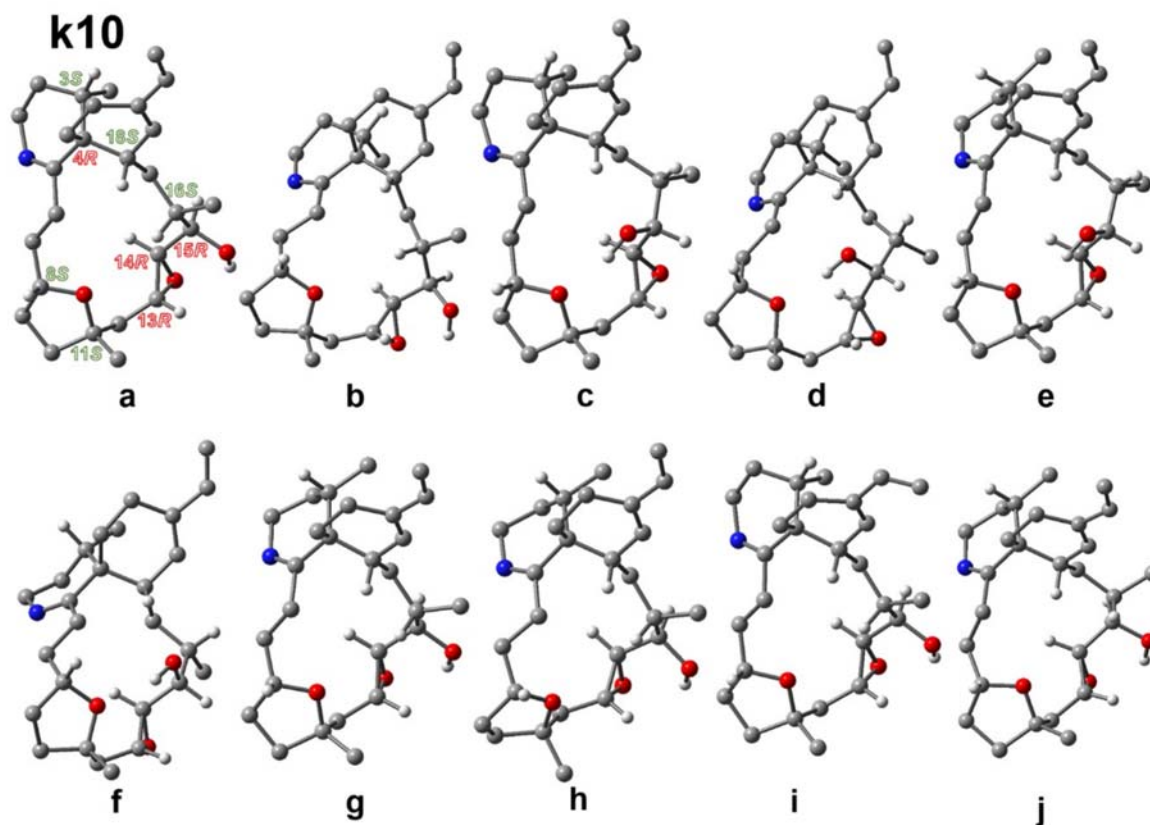

**Figure S10.** Calculated geometries of ten lowest free energy conformations of k10 isomer, (3*S*, 4*R*, 8*S*, 11*S*, 13*R*, 14*R*, 15*R*, 16*S*, 18*S*).

**Table S11.** Calculated dihedral angles,<sup>1</sup> free energies,<sup>2</sup> equilibrium populations, and optical rotation values of ten lowest free energy conformations of k11 isomer, (3*S*, 4*R*, 8*S*, 11*S*, 13*R*, 14*R*, 15*S*, 16*R*, 18*S*).

| Conf.   | D1     | D2     | D3   | D4    | D5     | D6    | D7    | D8    | $\Delta G$ | P(%) | $[\alpha]_D$ |
|---------|--------|--------|------|-------|--------|-------|-------|-------|------------|------|--------------|
| a       | 179.9  | -51.4  | 1.8  | -15.2 | 166.1  | -33.0 | 171.6 | 174.8 | 0.00       | 63.5 | +141.7       |
| b       | 179.7  | -51.8  | 3.5  | -14.1 | 156.8  | 24.9  | 166.8 | 179.6 | 0.93       | 13.4 | +95.3        |
| c       | 177.6  | 28.0   | 13.4 | 18.8  | 168.6  | -34.5 | 157.9 | -68.8 | 1.17       | 8.9  | -29.5        |
| d       | 177.2  | -51.9  | 11.6 | 24.3  | 153.7  | -33.5 | 174.1 | 163.3 | 1.85       | 2.8  | +10.6        |
| e       | 177.5  | 40.8   | 11.4 | 19.5  | 168.5  | -32.9 | 172.5 | 52.7  | 1.98       | 2.3  | -22.8        |
| f       | 177.2  | -52.5  | 12.4 | 25.2  | 140.4  | 22.7  | 170.2 | 172.9 | 2.25       | 1.4  | -47.7        |
| g       | 179.9  | -174.3 | 1.4  | -15.5 | 165.4  | -33.0 | 171.6 | 178.8 | 2.58       | 0.8  | +169.6       |
| h       | -34.2  | -51.5  | 2.2  | -15.6 | 166.0  | -33.1 | 171.5 | 175.0 | 2.61       | 0.8  | +212.6       |
| i       | 33.2   | -51.4  | 0.9  | -15.1 | 166.1  | -33.0 | 171.6 | 174.4 | 2.71       | 0.7  | -26.2        |
| j       | -179.9 | 40.0   | -0.1 | -21.0 | -176.0 | -32.8 | 167.3 | 64.5  | 2.72       | 0.7  | +118.8       |
| Average |        |        |      |       |        |       |       |       |            |      | +101.6       |

<sup>1</sup>D1: C19C20C23C24, D2: C14C15OH, D3: C19C20C21C22, D4: C4C5NC1, D5: C5C6C7C8, D6: C8C9C10C11, D7: C10C11C12C13, D8: C15C16C17C18. Units in degrees. <sup>2</sup>Units in kcal/mol.

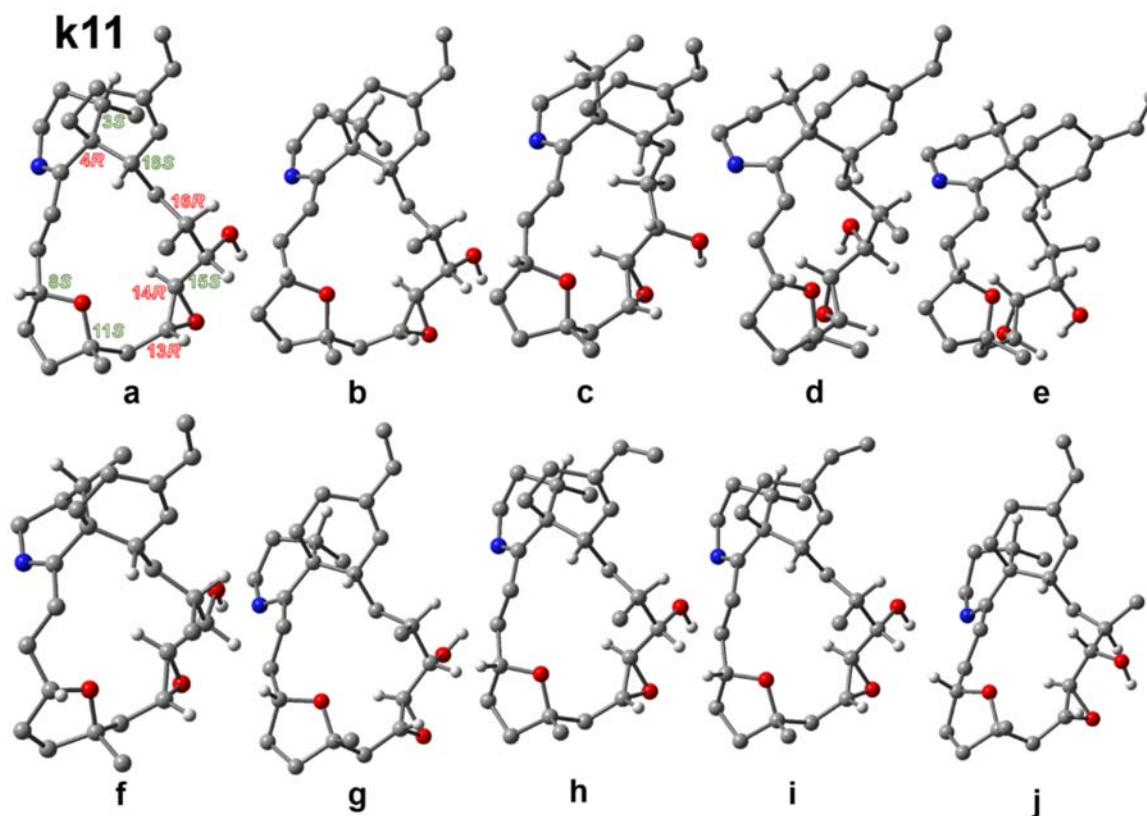

**Figure S11.** Calculated geometries of ten lowest free energy conformations of k11 isomer, (3*S*, 4*R*, 8*S*, 11*S*, 13*R*, 14*R*, 15*S*, 16*R*, 18*S*).

**Table S12.** Calculated dihedral angles,<sup>1</sup> free energies,<sup>2</sup> equilibrium populations, and optical rotation values of ten lowest free energy conformations of k12 isomer, (3*S*, 4*R*, 8*S*, 11*S*, 13*R*, 14*R*, 15*S*, 16*S*, 18*S*).

| Conf. | D1     | D2    | D3    | D4    | D5     | D6    | D7    | D8    | $\Delta G$ | P(%) | $[\alpha]_D$ |
|-------|--------|-------|-------|-------|--------|-------|-------|-------|------------|------|--------------|
| a     | 177.5  | 34.7  | 11.4  | 20.3  | 167.5  | -34.0 | 169.6 | 55.4  | 0.00       | 42.1 | +10.7        |
| b     | 179.9  | 33.7  | 1.1   | -19.8 | -177.5 | -33.6 | 165.0 | 68.5  | 0.54       | 16.9 | +151.5       |
| c     | 179.8  | -50.6 | 1.9   | -15.0 | 172.0  | -33.2 | 171.9 | 168.0 | 0.57       | 16.2 | +96.1        |
| d     | 179.5  | -51.4 | 4.0   | -13.6 | 169.3  | 32.5  | 163.2 | 169.1 | 0.98       | 8.1  | +33.4        |
| e     | 177.3  | 33.1  | 12.2  | 21.7  | 168.0  | 32.0  | 158.0 | 64.0  | 1.18       | 5.8  | -63.2        |
| f     | -178.3 | 35.6  | -47.1 | 18.3  | 164.6  | -33.8 | 170.9 | 54.2  | 1.44       | 3.8  | -54.9        |
| g     | 179.4  | 32.1  | 4.2   | -17.0 | -179.5 | 30.6  | 154.5 | 73.3  | 1.46       | 3.6  | +94.1        |
| h     | 177.0  | -50.2 | 11.9  | 24.1  | 160.8  | -33.7 | 175.0 | 153.7 | 2.57       | 0.6  | -33.6        |
| i     | -178.1 | 33.9  | -47.1 | 18.6  | 164.3  | 32.5  | 159.8 | 62.0  | 2.67       | 0.5  | -115.0       |
| j     | 33.9   | 34.9  | 10.6  | 20.3  | 167.3  | -34.0 | 169.8 | 55.1  | 2.73       | 0.4  | -113.3       |
|       |        |       |       |       |        |       |       |       | Average    |      | +45.5        |

<sup>1</sup>D1: C19C20C23C24, D2: C14C15OH, D3: C19C20C21C22, D4: C4C5NC1, D5: C5C6C7C8, D6: C8C9C10C11, D7: C10C11C12C13, D8: C15C16C17C18. Units in degrees. <sup>2</sup>Units in kcal/mol.

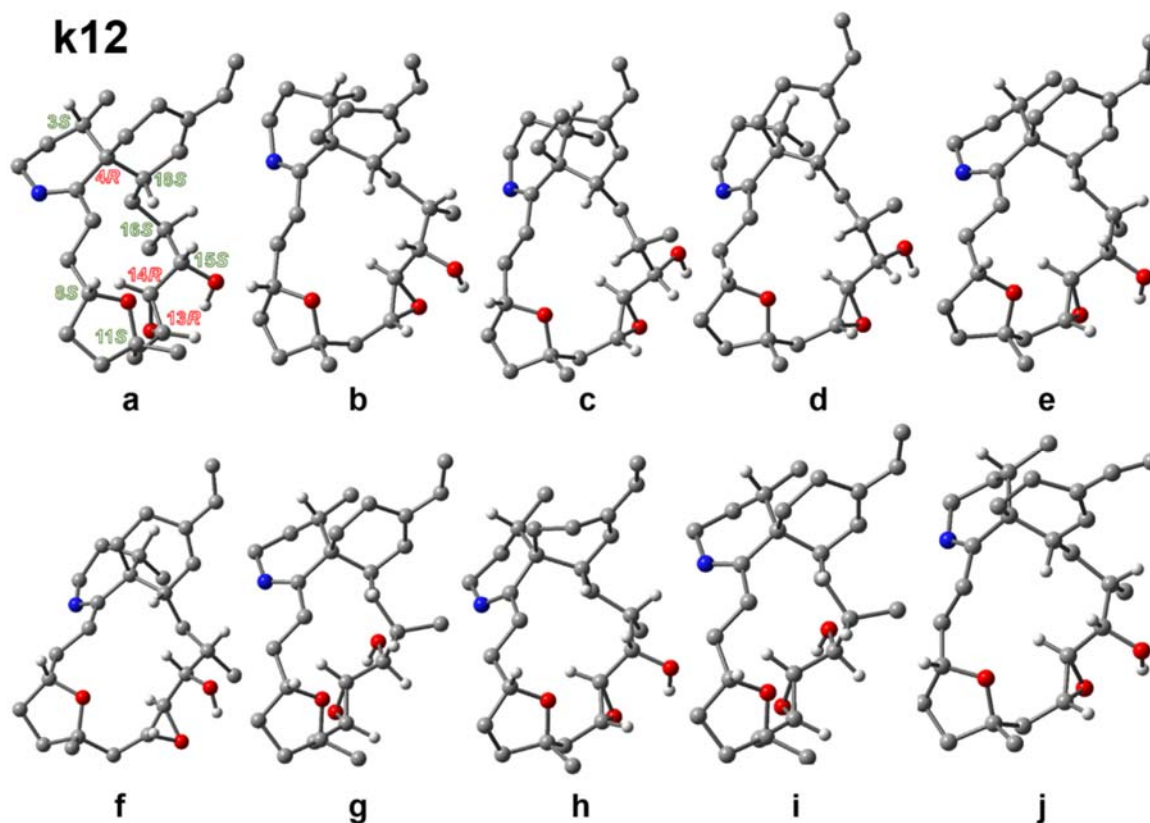

**Figure S12.** Calculated geometries of ten lowest free energy conformations of k12 isomer, (3*S*, 4*R*, 8*S*, 11*S*, 13*R*, 14*R*, 15*S*, 16*S*, 18*S*).

**Table S13.** Calculated dihedral angles,<sup>1</sup> free energies,<sup>2</sup> equilibrium populations, and optical rotation values of ten lowest free energy conformations of k13 isomer, (3*S*, 4*R*, 8*S*, 11*S*, 13*S*, 14*S*, 15*R*, 16*R*, 18*S*).

| Conf.   | D1     | D2    | D3    | D4    | D5    | D6    | D7    | D8    | $\Delta G$ | P(%) | $[\alpha]_D$ |
|---------|--------|-------|-------|-------|-------|-------|-------|-------|------------|------|--------------|
| a       | 177.3  | 54.1  | 15.5  | 22.5  | 164.9 | 14.1  | 54.3  | -62.7 | 0.00       | 25.6 | +27.4        |
| b       | 179.5  | 47.6  | 4.4   | -14.2 | 158.4 | 32.9  | 171.0 | 165.1 | 0.13       | 20.5 | +137.9       |
| c       | 177.3  | 54.9  | 14.9  | 22.1  | 161.5 | -17.2 | 59.9  | -61.3 | 0.21       | 17.9 | +41.1        |
| d       | 177.6  | -35.4 | 11.0  | 19.0  | 176.5 | 29.5  | 49.6  | 76.8  | 0.72       | 7.7  | -64.0        |
| e       | -180.0 | 51.2  | 0.4   | -15.6 | 170.2 | 28.0  | 76.6  | 170.2 | 1.25       | 3.2  | +134.6       |
| f       | -178.3 | -34.9 | -47.1 | 16.4  | 173.1 | 28.9  | 49.1  | 76.5  | 1.36       | 2.6  | -123.1       |
| g       | 179.0  | 54.4  | 9.0   | -29.7 | 164.5 | 18.2  | 54.0  | -61.6 | 1.39       | 2.5  | +38.7        |
| h       | 177.6  | 46.4  | 13.5  | 19.5  | 173.4 | 29.4  | 50.1  | -94.3 | 1.41       | 2.4  | -27.9        |
| i       | 179.8  | 42.6  | 1.7   | -14.7 | 168.9 | -30.2 | 171.8 | 164.8 | 1.42       | 2.4  | +160.5       |
| j       | 177.7  | 47.9  | 13.9  | 19.3  | 161.9 | -19.9 | 63.8  | -97.5 | 1.47       | 2.2  | +23.6        |
| Average |        |       |       |       |       |       |       |       |            |      | +51.7        |

<sup>1</sup>D1: C19C20C23C24, D2: C14C15OH, D3: C19C20C21C22, D4: C4C5NC1, D5: C5C6C7C8, D6: C8C9C10C11, D7: C10C11C12C13, D8: C15C16C17C18. Units in degrees. <sup>2</sup>Units in kcal/mol.

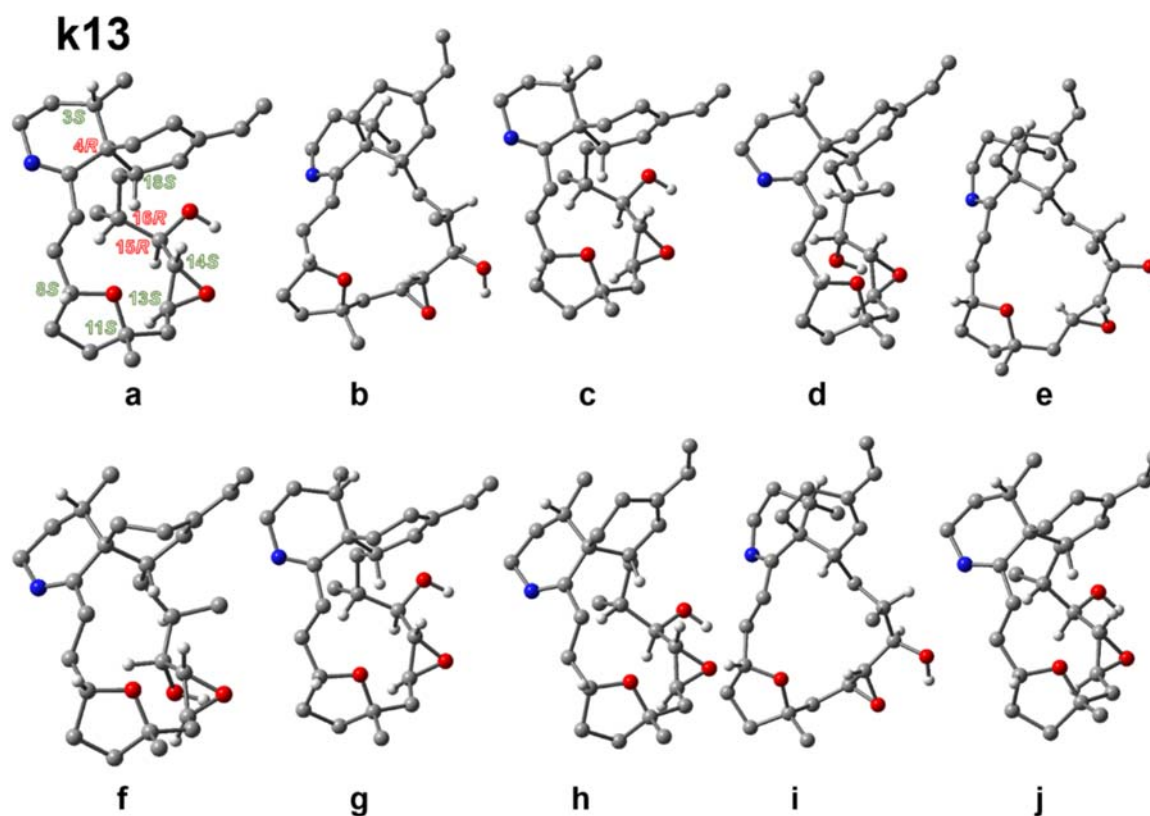

**Figure S13.** Calculated geometries of ten lowest free energy conformations of k13 isomer, (3*S*, 4*R*, 8*S*, 11*S*, 13*S*, 14*S*, 15*R*, 16*R*, 18*S*).

**Table S14.** Calculated dihedral angles,<sup>1</sup> free energies,<sup>2</sup> equilibrium populations, and optical rotation values of ten lowest free energy conformations of k14 isomer, (3*S*, 4*R*, 8*S*, 11*S*, 13*S*, 14*S*, 15*R*, 16*S*, 18*S*).

| Conf. | D1     | D2    | D3    | D4    | D5     | D6    | D7    | D8    | $\Delta G$ | P(%) | $[\alpha]_D$ |
|-------|--------|-------|-------|-------|--------|-------|-------|-------|------------|------|--------------|
| a     | 177.5  | -37.0 | 11.5  | 20.0  | 161.4  | -35.1 | 164.6 | 119.1 | 0.00       | 30.3 | -37.7        |
| b     | 179.7  | 51.6  | 2.9   | -15.5 | 178.6  | 27.7  | 77.8  | 163.5 | 0.42       | 14.9 | +71.3        |
| c     | 177.7  | -37.8 | 11.0  | 19.9  | 175.2  | 28.3  | 46.4  | 86.4  | 0.48       | 13.5 | -23.6        |
| d     | 177.7  | -33.6 | 12.0  | 19.9  | 171.0  | -25.7 | 58.6  | 78.9  | 0.60       | 11.2 | +26.3        |
| e     | 177.4  | -40.5 | 14.6  | 20.2  | 174.2  | 28.9  | 67.9  | 81.4  | 0.99       | 5.7  | -45.8        |
| f     | 179.7  | 50.7  | 2.1   | -15.2 | -178.2 | -27.3 | 88.6  | 166.6 | 1.28       | 3.6  | +139.9       |
| g     | 179.6  | 49.1  | 2.8   | -15.0 | 159.7  | 31.9  | 170.5 | 161.2 | 1.28       | 3.6  | +120.3       |
| h     | 179.7  | 54.8  | 3.0   | -16.5 | 170.1  | -36.3 | 130.8 | 168.0 | 1.30       | 3.4  | +123.4       |
| i     | 179.9  | -34.2 | 2.7   | -21.8 | 175.2  | -35.2 | 162.4 | 132.3 | 1.32       | 3.3  | +65.4        |
| j     | -178.0 | -31.3 | -46.2 | 16.6  | 165.5  | -26.5 | 59.2  | 73.1  | 1.44       | 2.7  | -47.6        |
|       |        |       |       |       |        |       |       |       | Average    |      | +15.8        |

<sup>1</sup>D1: C19C20C23C24, D2: C14C15OH, D3: C19C20C21C22, D4: C4C5NC1, D5: C5C6C7C8, D6: C8C9C10C11, D7: C10C11C12C13, D8: C15C16C17C18. Units in degrees. <sup>2</sup>Units in kcal/mol.

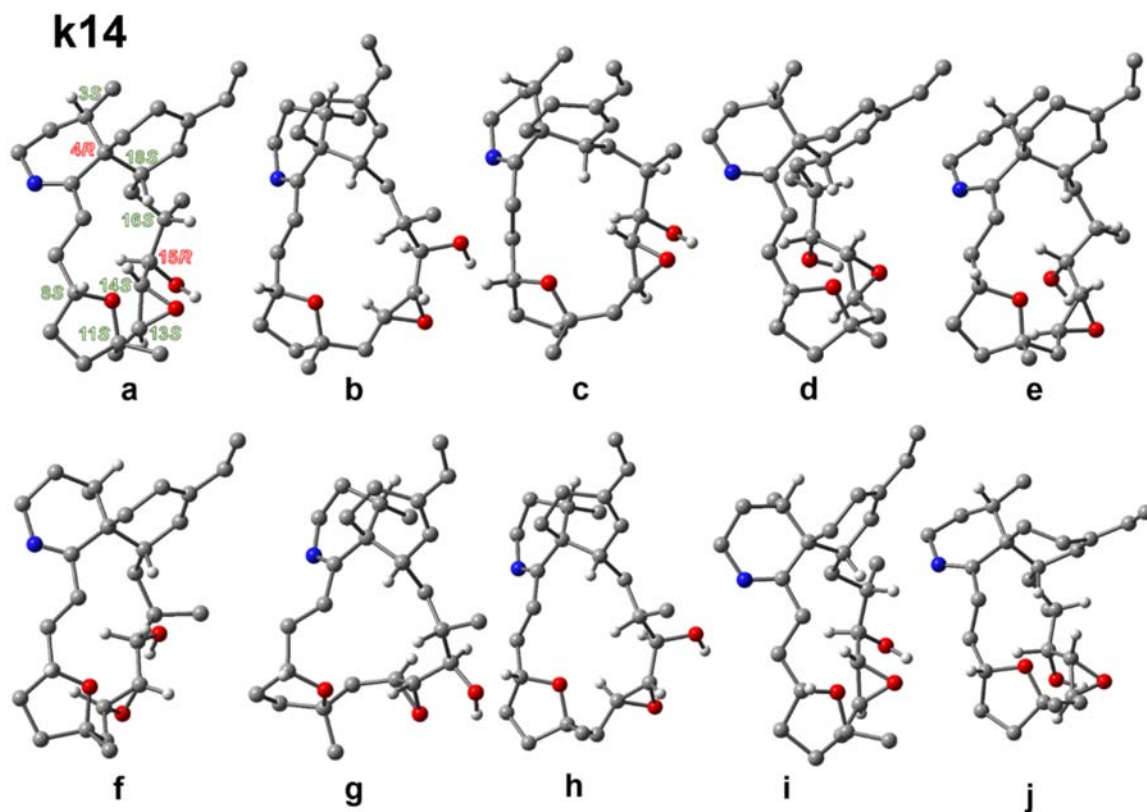

**Figure S14.** Calculated geometries of ten lowest free energy conformations of k14 isomer, (3*S*, 4*R*, 8*S*, 11*S*, 13*S*, 14*S*, 15*R*, 16*S*, 18*S*).



**Table S15.** Calculated dihedral angles,<sup>1</sup> free energies,<sup>2</sup> equilibrium populations, and optical rotation values of ten lowest free energy conformations of k15 isomer, (3*S*, 4*R*, 8*S*, 11*S*, 13*S*, 14*S*, 15*S*, 16*R*, 18*S*).

| Conf. | D1     | D2    | D3    | D4    | D5    | D6    | D7    | D8    | $\Delta G$ | P(%) | $[\alpha]_D$ |
|-------|--------|-------|-------|-------|-------|-------|-------|-------|------------|------|--------------|
| a     | 179.6  | -45.9 | 4.1   | -14.5 | 155.4 | 33.0  | 171.3 | 166.9 | 0.00       | 41.2 | +161.0       |
| b     | -179.9 | -31.2 | 0.4   | -17.3 | 156.2 | -35.3 | 146.3 | 179.3 | 0.53       | 16.8 | +203.7       |
| c     | 177.2  | -37.0 | 13.9  | 21.6  | 160.1 | -17.5 | 59.6  | -60.3 | 0.67       | 13.5 | +45.4        |
| d     | 177.2  | 55.0  | 14.6  | 22.5  | 175.3 | 34.1  | 82.2  | -72.5 | 1.29       | 4.7  | -53.2        |
| e     | -178.4 | -35.1 | -47.6 | 16.9  | 153.7 | -19.5 | 59.7  | -57.7 | 1.31       | 4.6  | -33.1        |
| f     | 179.7  | -35.9 | 3.5   | -24.5 | 173.1 | 21.9  | 55.6  | -59.0 | 1.38       | 4.0  | +105.0       |
| g     | 177.2  | -38.4 | 12.4  | 22.5  | 167.9 | -33.6 | 168.3 | 38.2  | 1.74       | 2.2  | +40.1        |
| h     | -179.8 | -37.4 | -0.3  | -21.3 | 175.7 | -34.0 | 166.1 | 45.8  | 1.75       | 2.2  | +168.5       |
| i     | 177.1  | -30.0 | 11.8  | 23.8  | 138.2 | -33.2 | 150.1 | 171.9 | 1.92       | 1.6  | +66.0        |
| j     | 177.4  | 58.7  | 14.3  | 20.9  | 167.3 | -36.6 | 131.7 | -76.6 | 2.04       | 1.4  | -3.3         |
|       |        |       |       |       |       |       |       |       | Average    |      | +116.7       |

<sup>1</sup>D1: C19C20C23C24, D2: C14C15OH, D3: C19C20C21C22, D4: C4C5NC1, D5: C5C6C7C8, D6: C8C9C10C11, D7: C10C11C12C13, D8: C15C16C17C18. Units in degrees. <sup>2</sup>Units in kcal/mol.

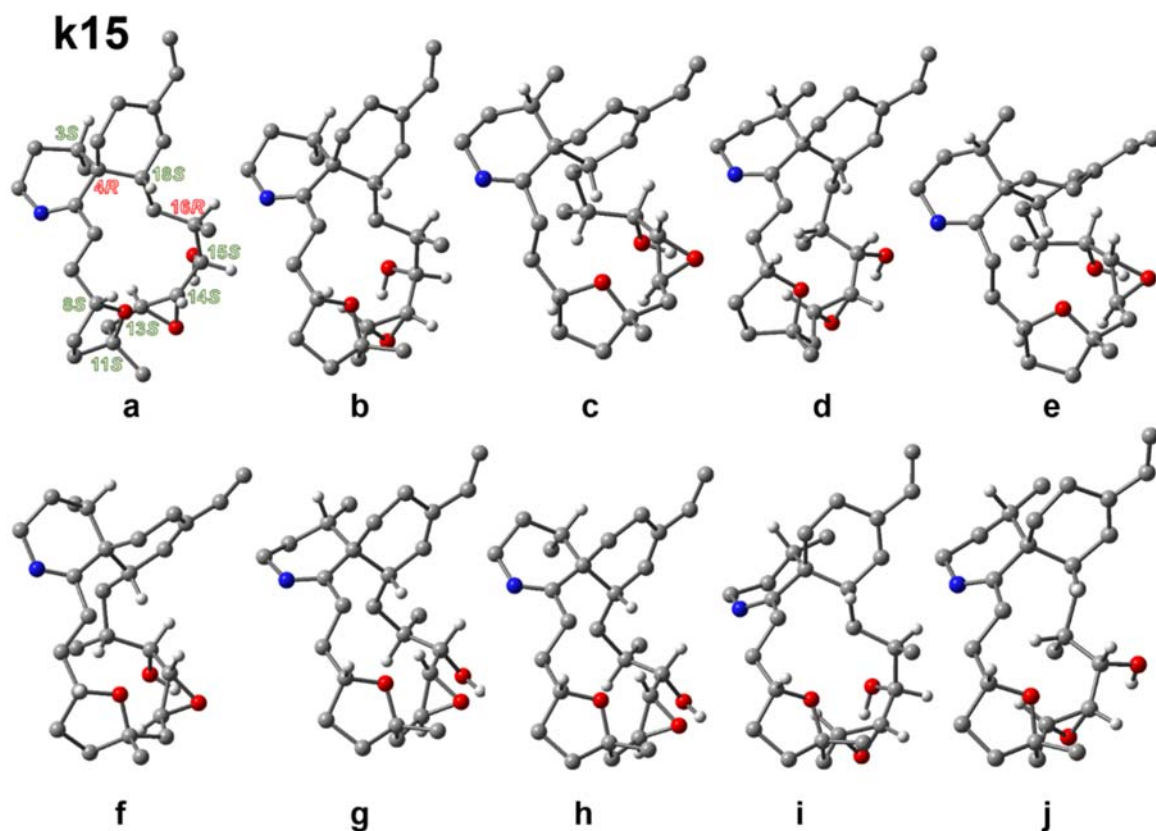

**Figure S15.** Calculated geometries of ten lowest free energy conformations of k15 isomer, (3*S*, 4*R*, 8*S*, 11*S*, 13*S*, 14*S*, 15*S*, 16*R*, 18*S*).

**Table S16.** Calculated dihedral angles,<sup>1</sup> free energies,<sup>2</sup> equilibrium populations, and optical rotation values of ten lowest free energy conformations of k16 isomer, (3*S*, 4*R*, 8*S*, 11*S*, 13*S*, 14*S*, 15*S*, 16*S*, 18*S*).

| Conf. | D1      | D2    | D3   | D4    | D5    | D6    | D7    | D8    | $\Delta G$ | P(%) | $[\alpha]_D$ |
|-------|---------|-------|------|-------|-------|-------|-------|-------|------------|------|--------------|
| a     | 179.7   | -42.2 | 3.2  | -16.4 | 178.9 | 29.6  | 75.7  | 168.6 | 0.00       | 39.4 | +65.8        |
| b     | 179.7   | -44.6 | 2.7  | -15.0 | 157.0 | 31.8  | 169.9 | 162.3 | 0.26       | 25.4 | +131.2       |
| c     | 179.7   | -37.7 | 3.3  | -17.8 | 169.7 | -37.2 | 132.5 | 171.6 | 0.69       | 12.5 | +112.9       |
| d     | -179.8  | -37.5 | -0.5 | -20.1 | 176.9 | -34.1 | 165.2 | 50.8  | 1.19       | 5.3  | +190.7       |
| e     | 179.3   | -44.1 | 4.8  | -11.7 | 86.6  | -35.6 | 168.5 | 165.9 | 1.53       | 3.0  | +210.3       |
| f     | 176.9   | -39.1 | 14.1 | 26.1  | 168.1 | 31.3  | 76.1  | 161.2 | 1.54       | 3.0  | -66.1        |
| g     | 177.0   | -34.2 | 15.2 | 24.7  | 154.3 | -37.3 | 137.1 | 162.1 | 1.71       | 2.2  | -7.1         |
| h     | 177.2   | -38.2 | 11.0 | 22.4  | 170.4 | -33.7 | 166.9 | 41.4  | 1.72       | 2.2  | +59.0        |
| i     | 177.2   | -46.1 | 13.8 | 24.9  | 145.5 | 31.6  | 173.6 | 143.7 | 1.94       | 1.5  | -58.7        |
| j     | -34.6   | -42.3 | 3.8  | -16.7 | 178.9 | 29.6  | 75.6  | 168.9 | 2.60       | 0.5  | +151.6       |
|       | Average |       |      |       |       |       |       |       |            |      | +91.0        |

<sup>1</sup>D1: C19C20C23C24, D2: C14C15OH, D3: C19C20C21C22, D4: C4C5NC1, D5: C5C6C7C8, D6: C8C9C10C11, D7: C10C11C12C13, D8: C15C16C17C18. Units in degrees. <sup>2</sup>Units in kcal/mol.

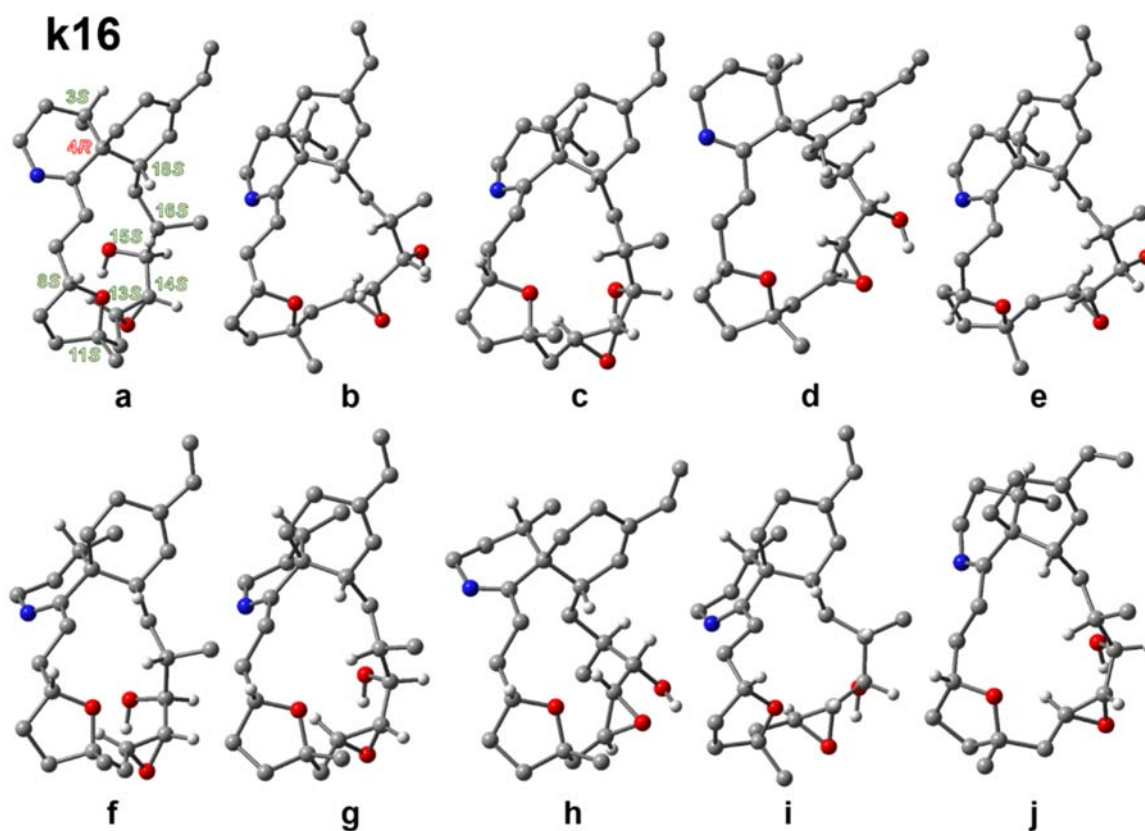

**Figure S16.** Calculated geometries of ten lowest free energy conformations of k16 isomer, (3*S*, 4*R*, 8*S*, 11*S*, 13*S*, 14*S*, 15*S*, 16*S*, 18*S*).

Table S17. NMR data of portimine (**1**) in free and TFA salt form

| Position | Portimine ( <b>1</b> ) free form |                 | Portimine ( <b>1</b> ) TFA salt |                 |
|----------|----------------------------------|-----------------|---------------------------------|-----------------|
|          | <sup>1</sup> H                   | <sup>13</sup> C | <sup>1</sup> H                  | <sup>13</sup> C |
| 1        | a 3.71 (m)                       | 54.6            | 4.00 (m)                        | 50.1            |
|          | b 3.81 (dd, 14.9, 8.5)           | -               | 4.07 (m)                        | -               |
| 2        | a 1.93 (m)                       | 28.3            | 2.07 (m)                        | 29.7            |
|          | b 1.96 (m)                       | -               | 2.07 (m)                        | -               |
| 3        | -                                | 53.1            | -                               | 54.9            |
| 4        | -                                | 185.8           | -                               | nd              |
| 5        | 4.58 (brs)                       | 65.5            | 5.04 (brs)                      | 66.4            |
| 6        | a 1.96 (m)                       | 42.9            | 2.14 (dd, 16.3, 2.0)            | 46.2            |
|          | b 2.89 (dd, 16.1, 5.7)           | -               | 3.12 (dd, 16.2, 5.5)            | -               |
| 7        | -                                | 108.8           | -                               | 110.1           |
| 8        | a 1.65 (m)                       | 37.4            | 1.77 (m)                        | 39.3            |
|          | b 2.00 (dd)                      | -               | 2.00 (dd, 12.3, 6.6)            | -               |
| 9        | a 1.75 (m)                       | 24.0            | 1.78 (m)                        | 25.2            |
|          | b 1.85 (m)                       | -               | 1.88 (m)                        | -               |
| 10       | 4.17 (m)                         | 83.2            | 4.25 (m)                        | 85.6            |
| 11       | 2.19 (m)                         | 34.1            | 2.22 (m)                        | 35.1            |
| 12       | a 1.46 (dd, 14.1, 2.9)           | 33.7            | 1.50 (dd, 13.2, 2.9)            | 34.8            |
|          | b 2.29 (ddd, 14.1, 11.3, 10.8)   | -               | 2.22 (m)                        | -               |
| 13       | 3.91 (dd, 11.5, 2.9)             | 78.8            | 3.95 (dd, 11.1, 3.0)            | 79.8            |
| 14       | -                                | 204.2           | -                               | 204.0           |
| 15       | 4.49 (d, 12.0)                   | 71.2            | 4.58 (d, 12.1)                  | 71.9            |
| 16       | 3.73 (brd, 10.5)                 | 40.4            | 4.01 (brd, 9.6)                 | 43.8            |
| 17       | 5.12 (brs)                       | 127.6           | 5.14 (brs)                      | 126.5           |
| 18       | -                                | 135.1           | -                               | 137.0           |
| 19       | 2.38 (m)                         | 22.2            | 2.52 (m)                        | 23.2            |
| 20       | 1.80 (m)                         | 28.7            | 2.25 (m)                        | 27.6            |
| 21       | 6.23 (dd, 17.4, 10.8)            | 138.6           | 6.27 (dd, 17.5, 10.8)           | 139.3           |
| 22       | a 4.93 (d, 10.8)                 | 110.5           | 5.02 (d, 10.8)                  | 113.3           |
|          | b 5.10 (d, 17.4)                 | -               | 5.20 (17.5)                     | -               |
| 23       | 0.89 (d, 7.1)                    | 16.6            | 0.91 (d, 6.5)                   | 18.0            |

(in methanol-*d*<sub>4</sub>)

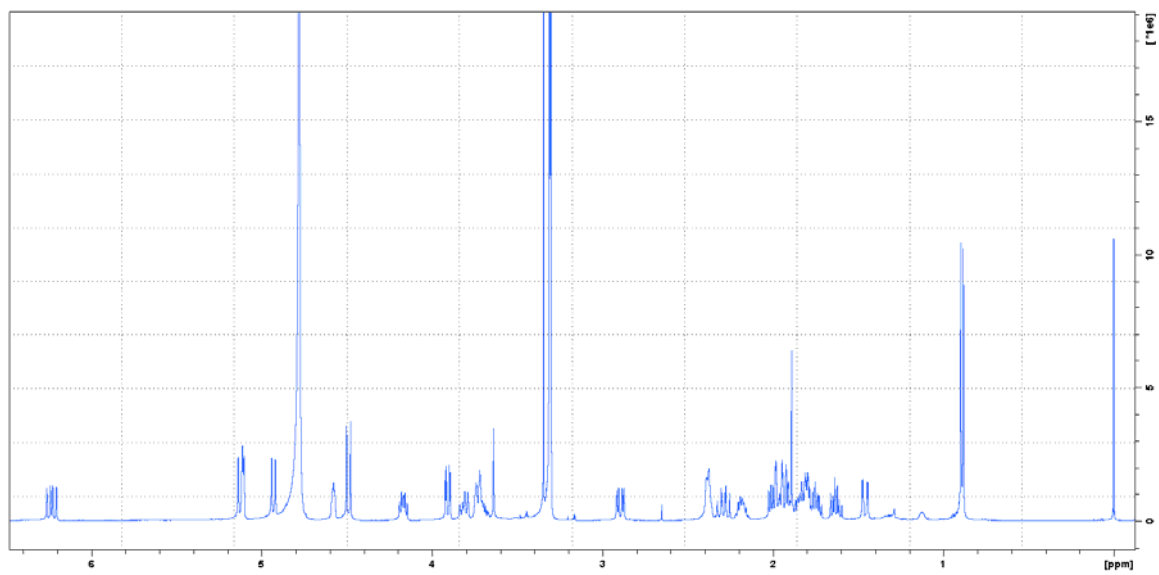

Figure S17.  $^1\text{H}$  NMR spectrum of portimine (**1**) in methanol- $d_4$

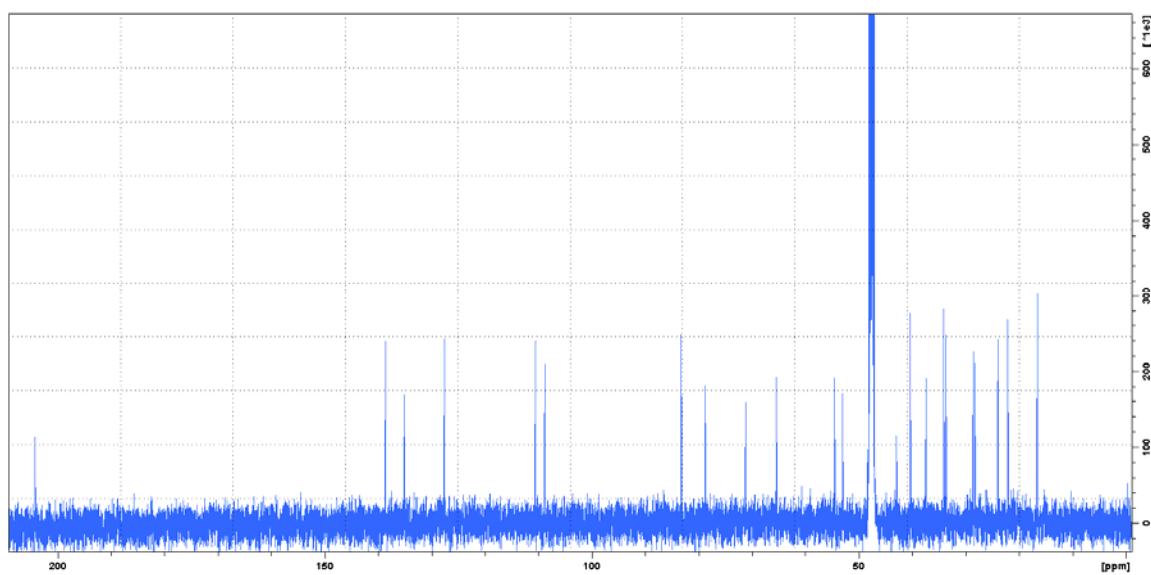

Figure S18.  $^{13}\text{C}$  NMR spectrum of portimine (**1**) in methanol- $d_4$

測定データ名: IH D5-41-5  
作成条件: Average(MS[1] Time:0.71..0.83)  
試料名(内部): IH D5-41-5

実験日時: 2016/02/04 13:23:54  
イオン化モード: Dual ESI+

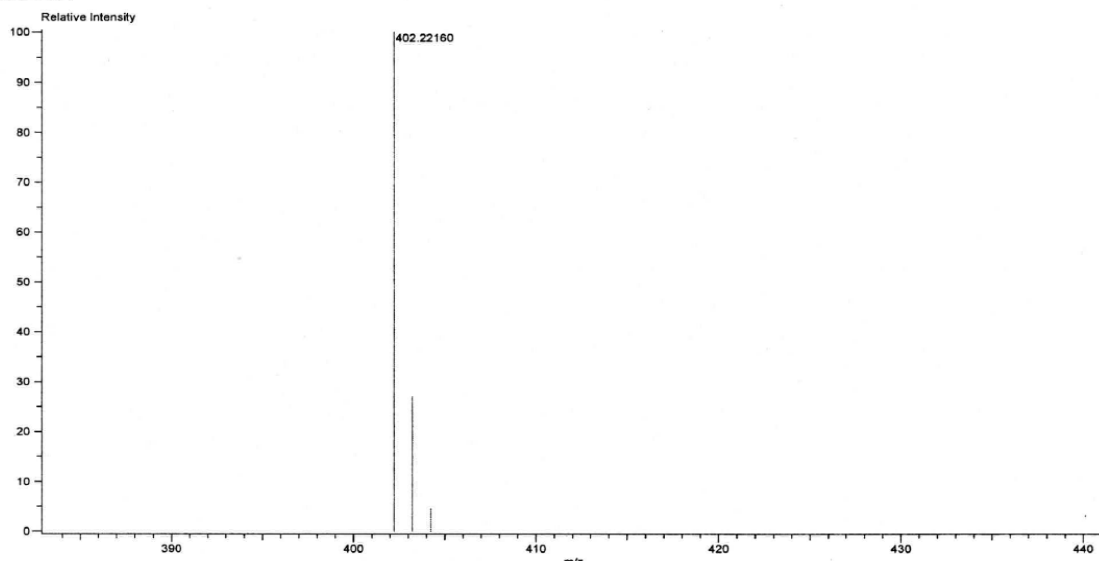

Figure S19. HRESIMS spectrum of portimine (1)

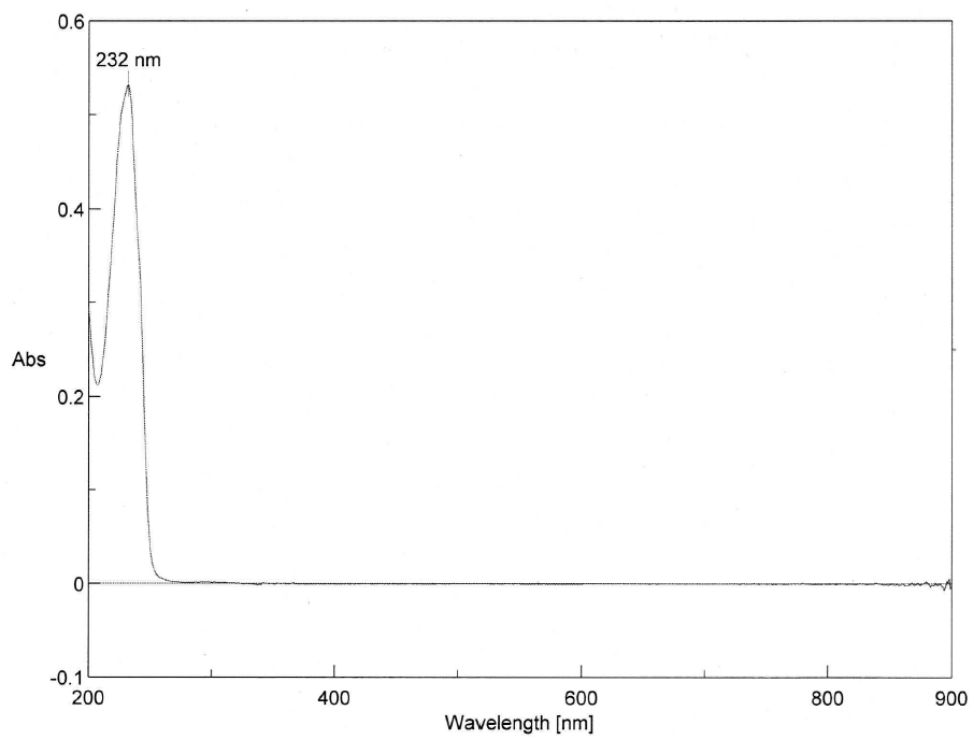

Figure S20. UV spectrum of portimine (**1**) in methanol

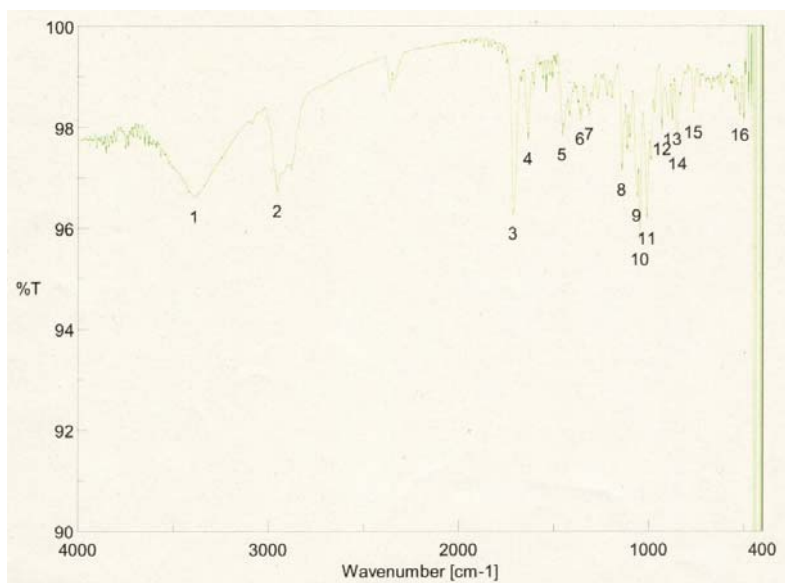

Figure S21. FTIR spectrum of portimine (**1**)



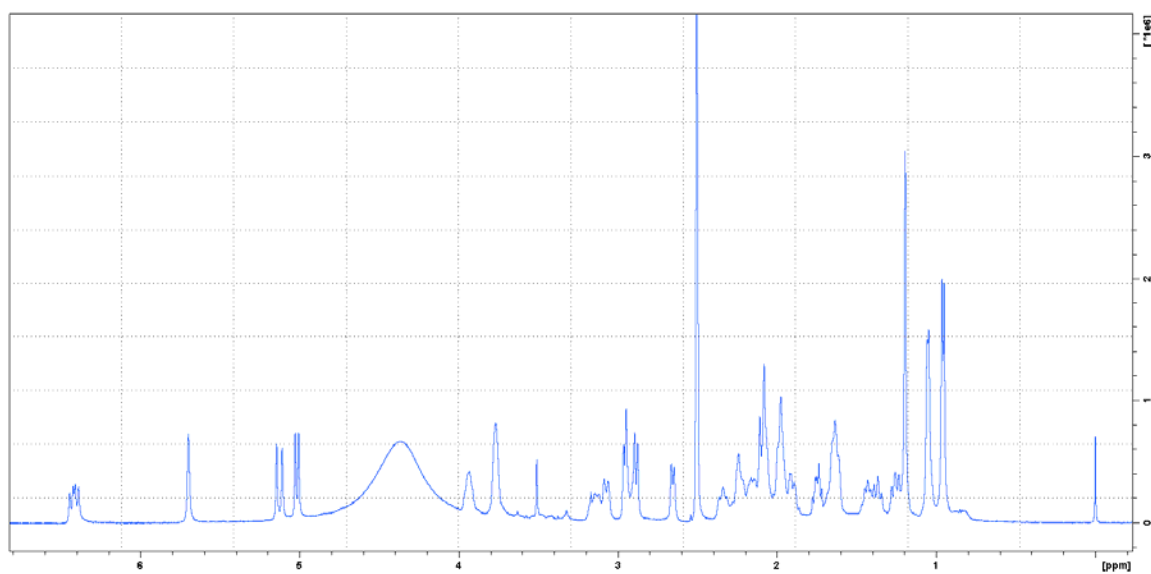

Figure S22.  $^1\text{H}$  NMR spectrum of kabirimine (**2**) in  $\text{DMSO-}d_6$

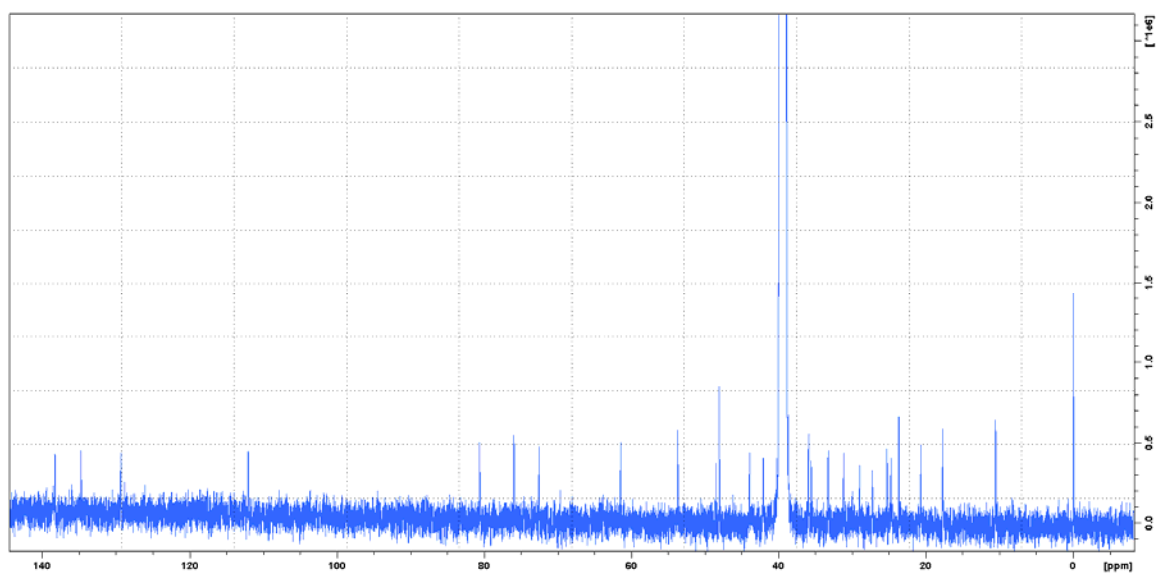

Figure S23.  $^{13}\text{C}$  NMR spectrum of kabirimine (**2**) in  $\text{DMSO-}d_6$

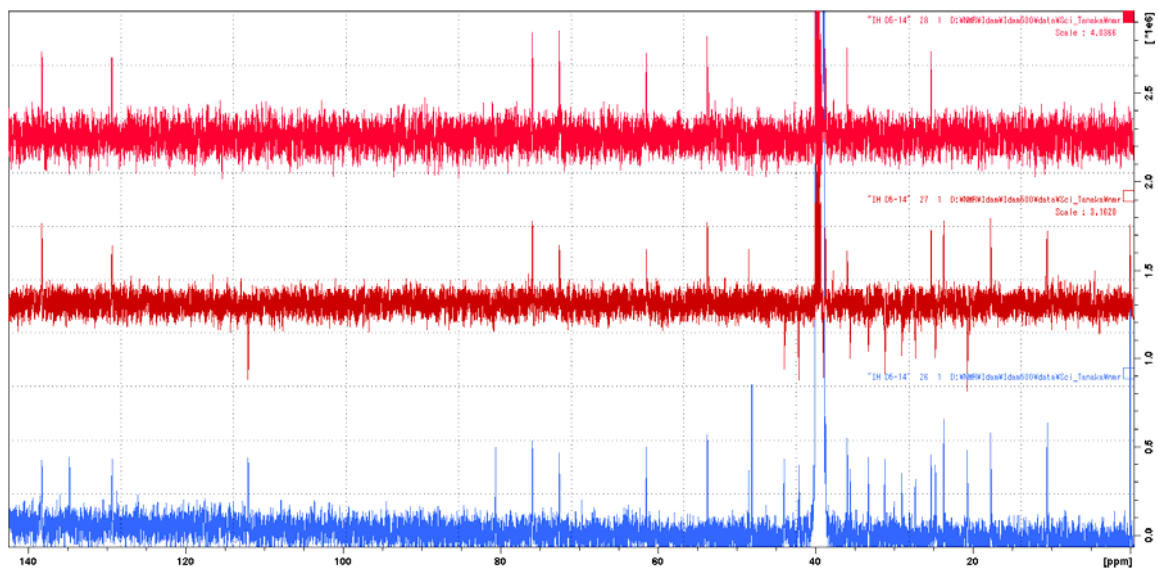

Figure S24. DEPT spectra of kabirimine (**2**) in DMSO- $d_6$

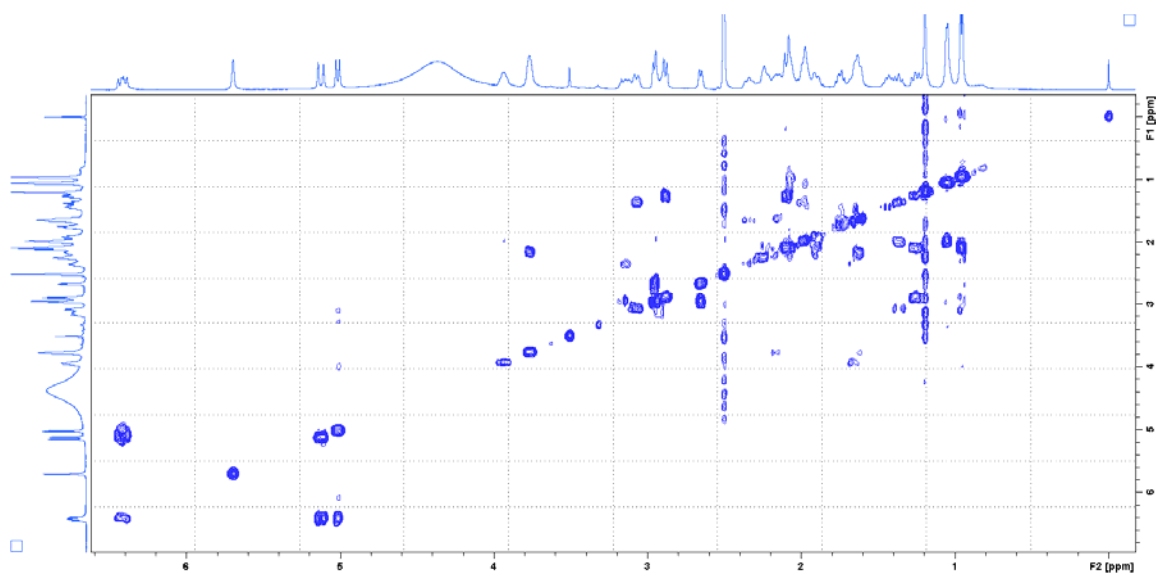

Figure S25. COSY spectrum of kabirimine (**2**) in DMSO- $d_6$

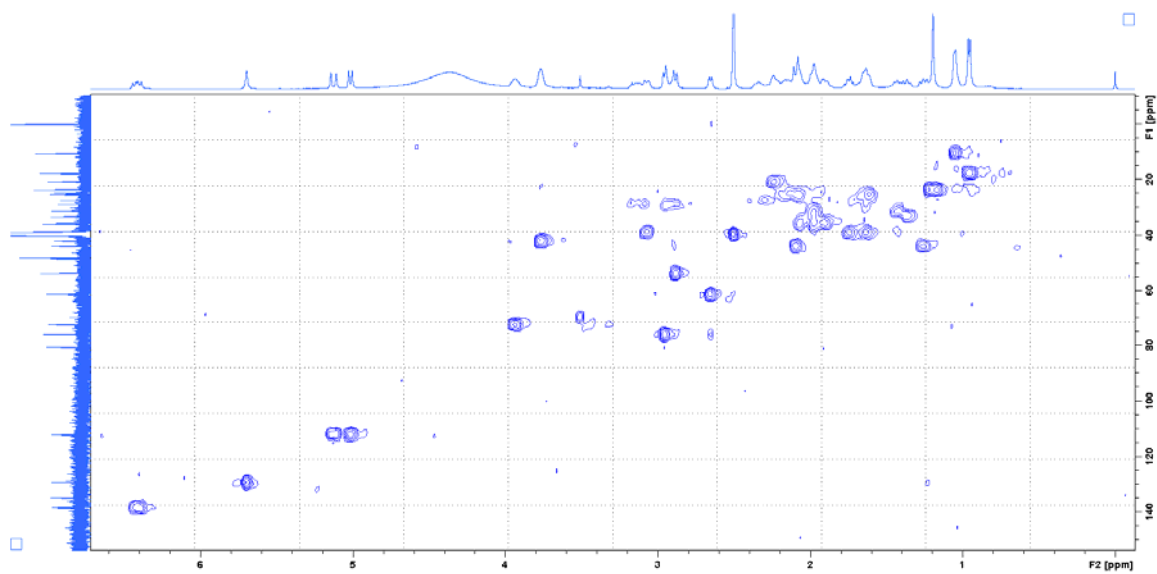

Figure S26. HSQC spectrum of kabirimine (**2**) in DMSO- $d_6$

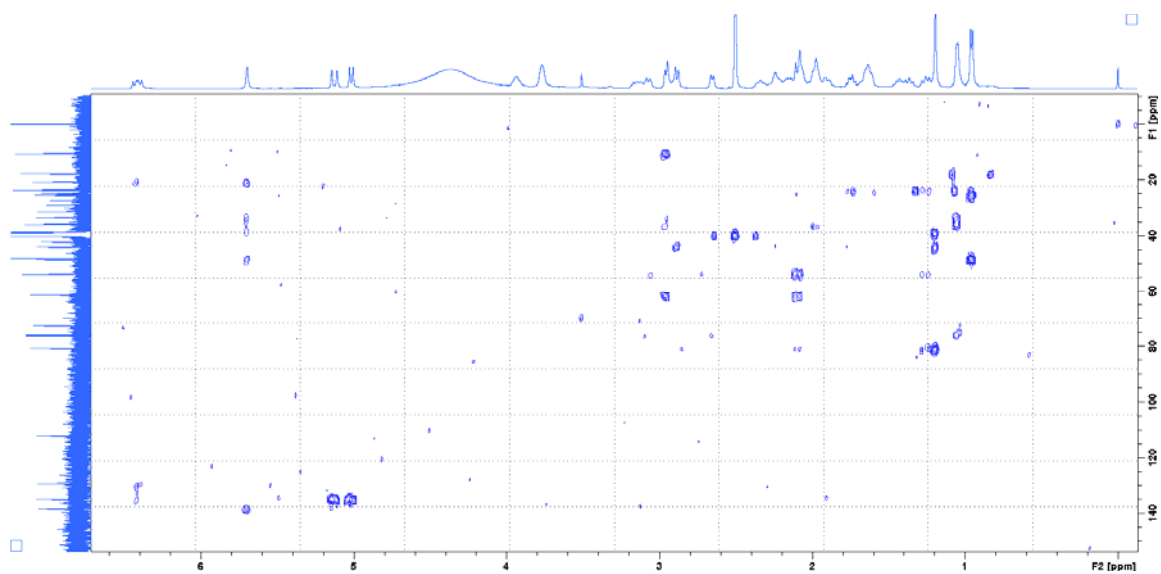

Figure S27. HMBC spectrum of kabirimine (2) in DMSO- $d_6$

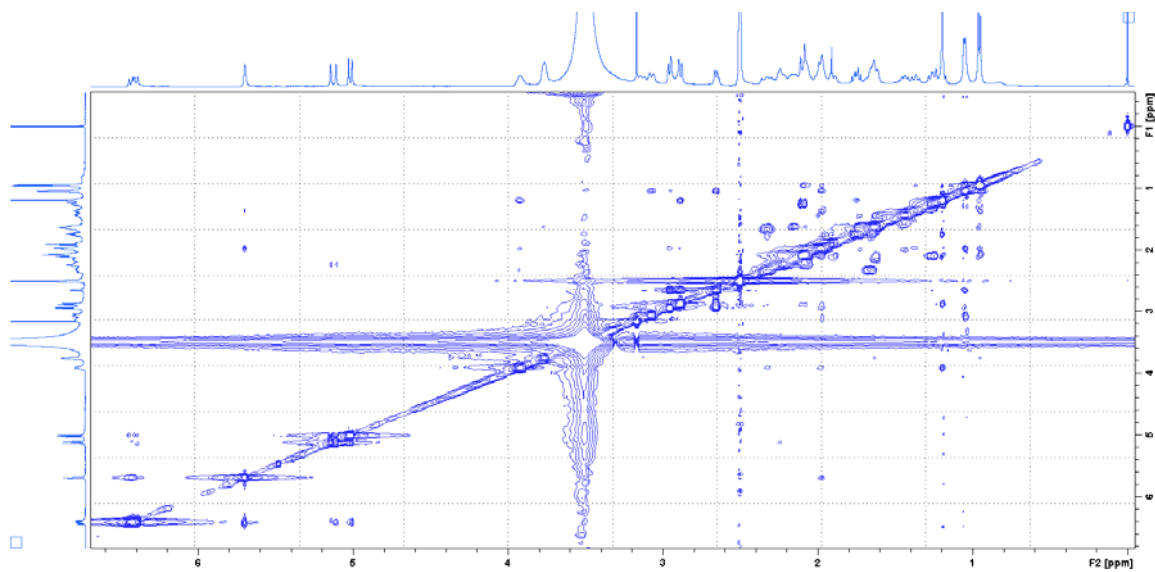

Figure S28. NOESY spectrum of kabirimine (**2**) in DMSO- $d_6$

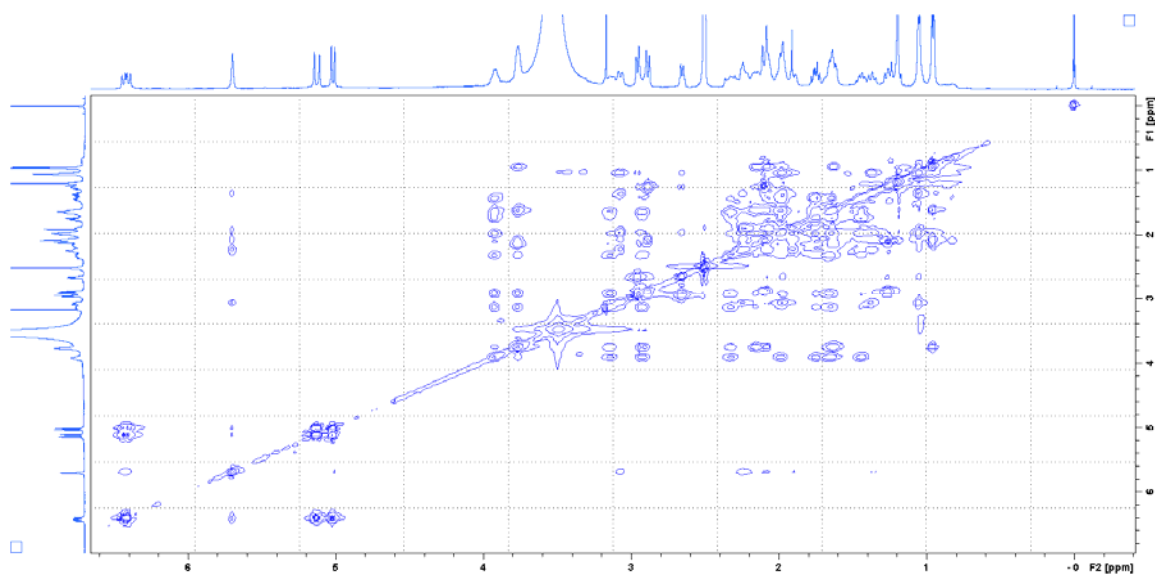

Figure S29. TOCSY spectrum of kabirimine (**2**) in DMSO- $d_6$



測定データ名: IH D5-11-1  
作成条件: 平均(MS[1]) 経過時間: 0.69.0.71)-1.0\*平均(MS[1]) 経過時間: 0.35.0.38  
試料名 (内部): IH D5-11-1

実験日時: 2015/02/13 15:07:35  
イオン化モード: デュアルESI+

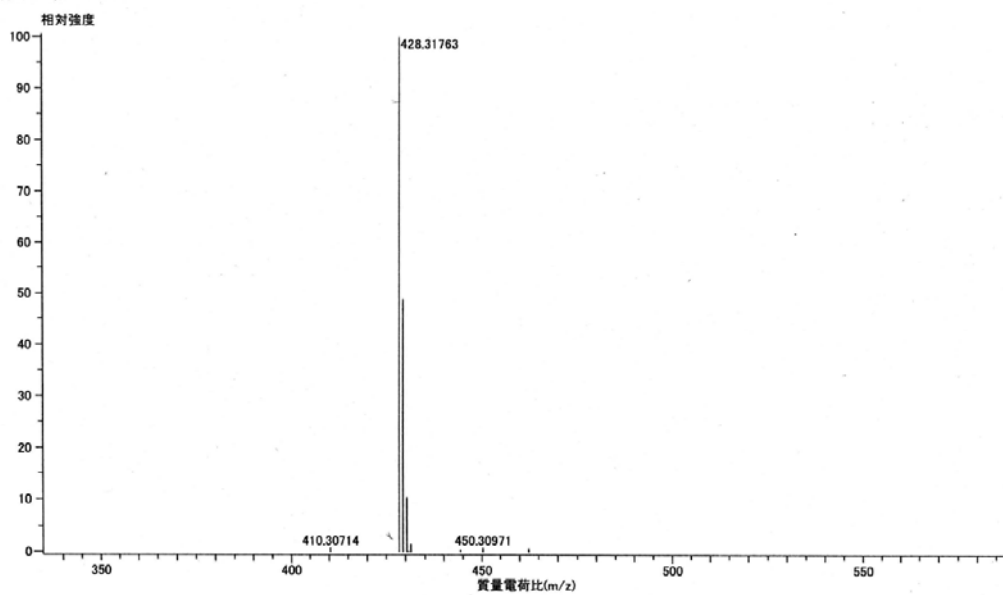

Figure S30. HRESIMS spectrum of kabirimine (2)

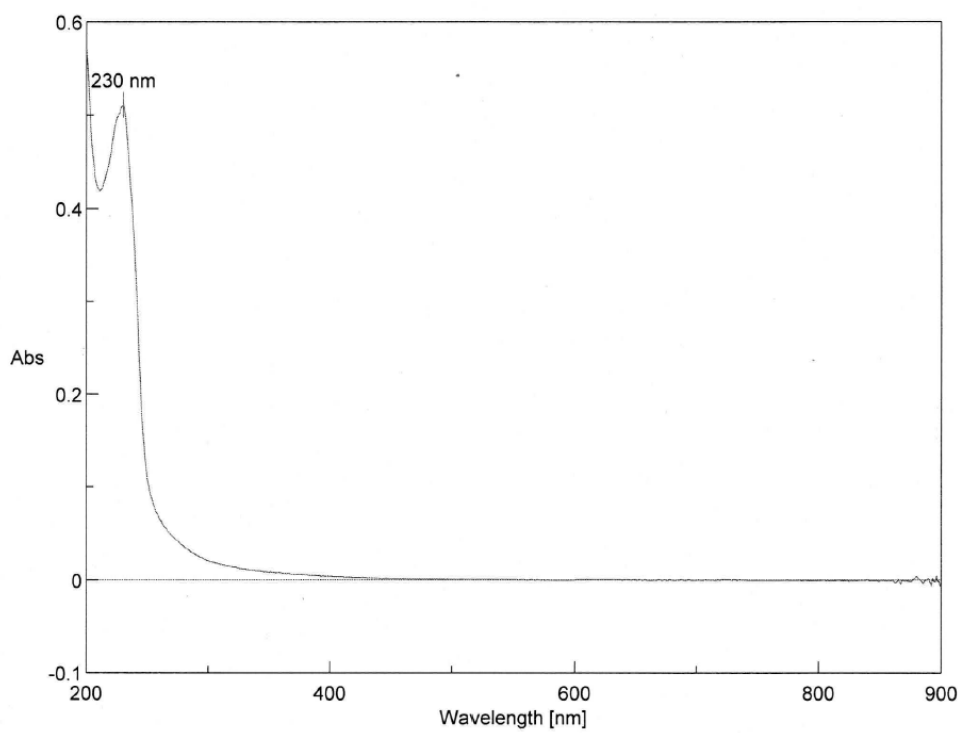

Figure S31. UV spectrum of kabirimine (2) in methanol

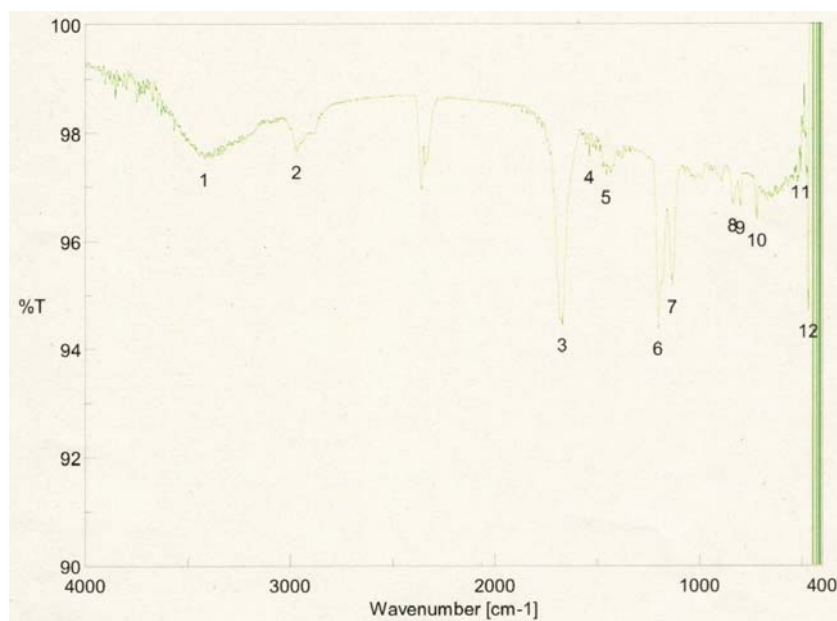

Figure S32. FTIR spectrum of kabirimine (2)

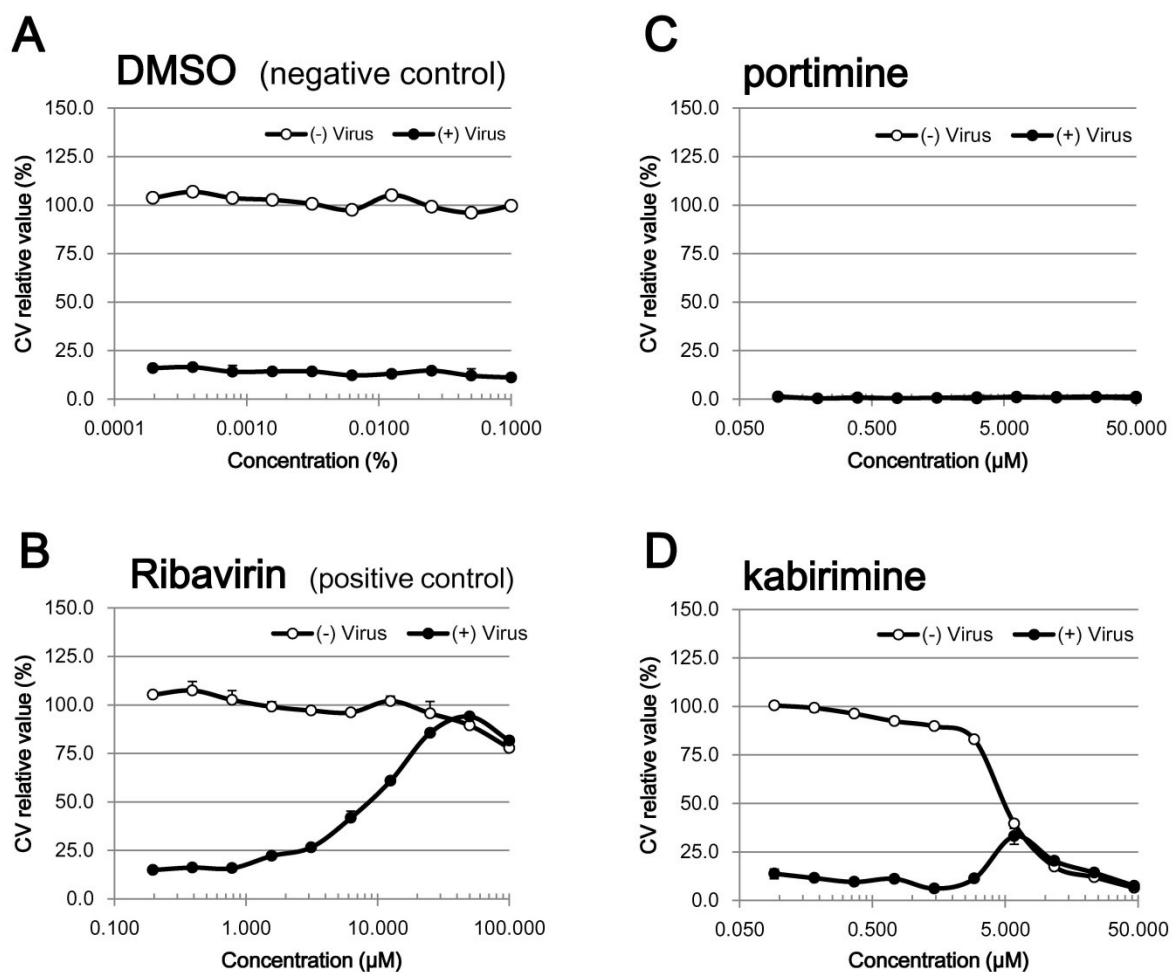

Figure S33. Evaluation of anti-RSV activities and cytotoxicities of portimine (1) and kabirimine (2).

The assay was performed as described under Experimental section. HEP-2 cells were grown in 96-well plates and infected with RSV (strain A2) in the presence of 2-fold serially diluted the tested compounds. For the evaluation of cytotoxicities, HEP-2 cells were grown in the presence of compounds without viruses. Three days after infection, the cells were fixed and stained with crystal violet (CV), and the absorbance was measured using a plate reader. Relative CV value (%) is expressed as a percentage of the uninfected cells. (A) Dose-response curve of DMSO used the solvent for the tested compounds. (B) Dose-response curve of Ribavirin which is well known to exhibit anti-RSV activities. DMSO and Ribavirin were used as negative and positive control respectively for the validation of the assay. (C) Dose-response curve of portimine (1). (D) Dose-response curve of kabirimine (2). Open circles represent uninfected groups to evaluate the cytotoxicity. Closed circles represent infected groups to evaluated anti-RSV activity.

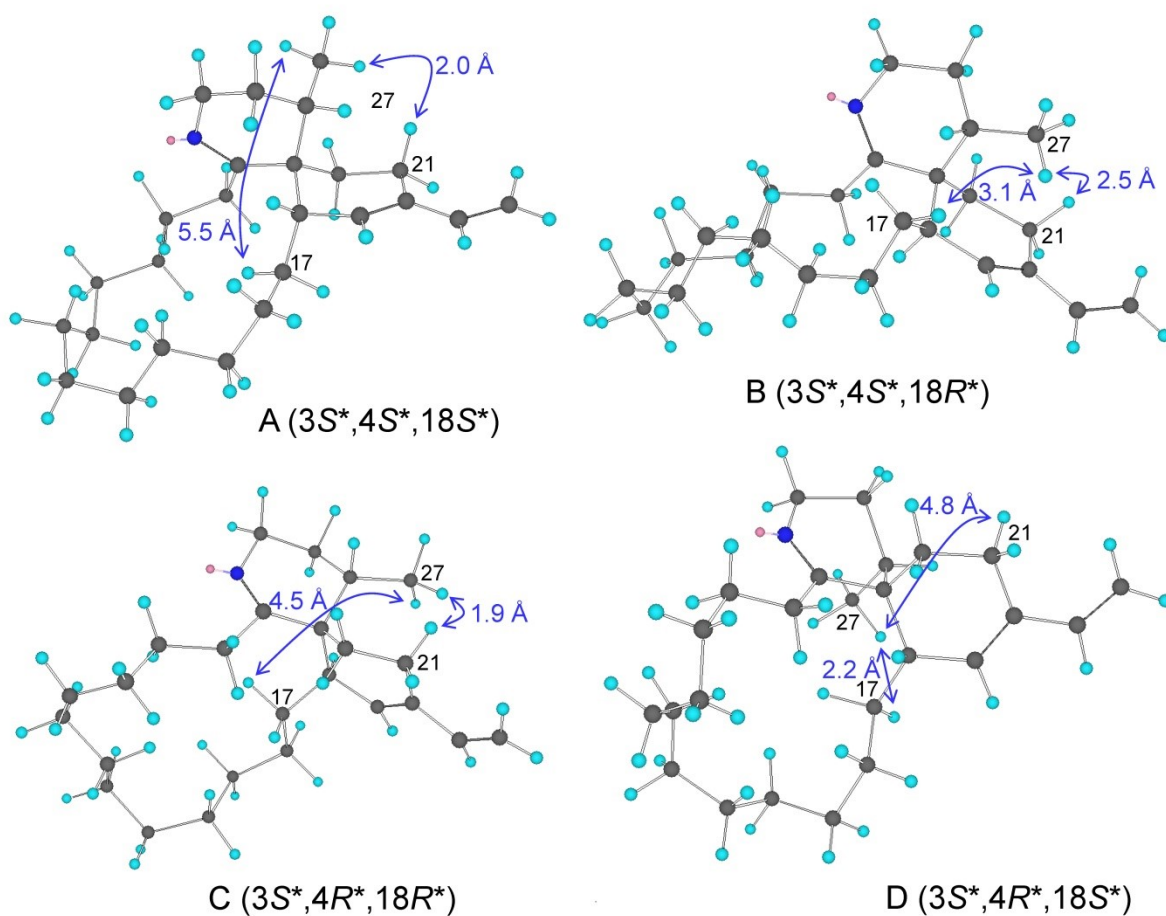

Figure S34. A stable conformation for each model structure A-D was obtained after MM/MD of MM2 in Chem3D. All the structures A-D took a relatively rigid conformation for the spirocyclic portion. The estimated distances for H-17/H-27 and H-21/H-27 were indicated for each molecule.

X-ray Structure Report

for

Portimine\_3

April 29, 2016

## Experimental

### Data Collection

A colorless platelet crystal of  $C_{23}H_{31}NO_5$  having approximate dimensions of 0.290 x 0.220 x 0.050 mm was mounted on a glass fiber. All measurements were made on a Rigaku R-Axis RAPID diffractometer using graphite monochromated Cu-K $\alpha$  radiation.

The crystal-to-detector distance was 127.40 mm.

Cell constants and an orientation matrix for data collection corresponded to a primitive monoclinic cell with dimensions:

$$\begin{aligned} a &= 8.5456(2) \text{ \AA} \\ b &= 9.8717(3) \text{ \AA} & \beta &= 104.479(7)^\circ \\ c &= 12.8048(3) \text{ \AA} \\ V &= 1045.90(6) \text{ \AA}^3 \end{aligned}$$

For  $Z = 2$  and F.W. = 401.50, the calculated density is 1.275 g/cm<sup>3</sup>. Based on the reflection conditions of:

$$0k0: k = 2n$$

packing considerations, a statistical analysis of intensity distribution, and the successful solution and refinement of the structure, the space group was determined to be:

$$P2_1 \text{ (#4)}$$

The data were collected at a temperature of  $23 \pm 1^\circ\text{C}$  to a maximum  $2\theta$  value of  $136.4^\circ$ . A total of 180 oscillation images were collected. A sweep of data was done using  $\omega$  scans from  $80.0$  to  $260.0^\circ$  in  $5.00^\circ$  step, at  $\chi=54.0^\circ$  and  $\phi = 0.0^\circ$ . The exposure rate was 60.0 [sec./ $^\circ$ ]. A second sweep was performed using  $\omega$  scans from  $80.0$  to  $260.0^\circ$  in  $5.00^\circ$  step, at  $\chi=54.0^\circ$  and  $\phi = 90.0^\circ$ . The exposure rate was 60.0

[sec./°]. Another sweep was performed using  $\omega$  scans from 80.0 to 260.0° in 5.00° step, at  $\chi=54.0^\circ$  and  $\phi = 180.0^\circ$ . The exposure rate was 60.0 [sec./°]. Another sweep was performed using  $\omega$  scans from 80.0 to 260.0° in 5.00° step, at  $\chi=54.0^\circ$  and  $\phi = 270.0^\circ$ . The exposure rate was 60.0 [sec./°]. Another sweep was performed using  $\omega$  scans from 80.0 to 260.0° in 5.00° step, at  $\chi=0.0^\circ$  and  $\phi = 0.0^\circ$ . The exposure rate was 60.0 [sec./°]. The crystal-to-detector distance was 127.40 mm. Readout was performed in the 0.100 mm pixel mode.

### Data Reduction

Of the 11959 reflections were collected, where 3680 were unique ( $R_{\text{int}} = 0.0563$ ); equivalent reflections were merged.

The linear absorption coefficient,  $\mu$ , for Cu-K $\alpha$  radiation is 7.246 cm<sup>-1</sup>. An empirical absorption correction was applied which resulted in transmission factors ranging from 0.679 to 0.964. The data were corrected for Lorentz and polarization effects.

### Structure Solution and Refinement

The structure was solved by direct methods<sup>1</sup> and expanded using Fourier techniques. The non-hydrogen atoms were refined anisotropically. Hydrogen atoms were refined using the riding model. The final cycle of full-matrix least-squares refinement<sup>2</sup> on  $F^2$  was based on 3680 observed reflections and 270 variable parameters and converged (largest parameter shift was 0.00 times its esd) with unweighted and weighted agreement factors of:

$$R1 = \sum ||F_o| - |F_c|| / \sum |F_o| = 0.0600$$

$$wR2 = [ \sum ( w (F_o^2 - F_c^2)^2 ) / \sum w(F_o^2)^2 ]^{1/2} = 0.1543$$

The goodness of fit<sup>3</sup> was 1.11. Unit weights were used. The maximum and minimum peaks on the final difference Fourier map corresponded to 0.20 and -0.29 e-/Å<sup>3</sup>, respectively. The final Flack parameter<sup>4</sup> was 0.11(16), indicating that the present absolute structure is correct.<sup>5</sup>



Neutral atom scattering factors were taken from International Tables for Crystallography (IT), Vol. C, Table 6.1.1.4<sup>6</sup>. Anomalous dispersion effects were included in  $F_{\text{calc}}$ <sup>7</sup>; the values for  $\Delta f'$  and  $\Delta f''$  were those of Creagh and McAuley<sup>8</sup>. The values for the mass attenuation coefficients are those of Creagh and Hubbell<sup>9</sup>. All calculations were performed using the CrystalStructure<sup>10</sup> crystallographic software package except for refinement, which was performed using SHELXL Version 2014/7<sup>11</sup>.

### References

(1) SHELXT Version 2014/5: Sheldrick, G. M. (2014). Acta Cryst. A70, C1437.

(2) Least Squares function minimized: (SHELXL Version 2014/7)

$$\sum w(F_o^2 - F_c^2)^2 \quad \text{where } w = \text{Least Squares weights.}$$

(3) Goodness of fit is defined as:

$$[\sum w(F_o^2 - F_c^2)^2 / (N_o - N_v)]^{1/2}$$

where:  $N_o$  = number of observations  
 $N_v$  = number of variables

(4) Parsons, S. and Flack, H. (2004), Acta Cryst. A60, s61.

(5) Flack, H.D. and Bernardinelli (2000), J. Appl. Cryst. 33, 114-1148.

(6) International Tables for Crystallography, Vol.C (1992). Ed. A.J.C. Wilson, Kluwer Academic Publishers, Dordrecht, Netherlands, Table 6.1.1.4, pp. 572.

(7) Ibers, J. A. & Hamilton, W. C.; Acta Crystallogr., 17, 781 (1964).

(8) Creagh, D. C. & McAuley, W.J. ; "International Tables for Crystallography", Vol C, (A.J.C. Wilson, ed.), Kluwer Academic Publishers, Boston, Table 4.2.6.8, pages 219-222 (1992).

(9) Creagh, D. C. & Hubbell, J.H.; "International Tables for Crystallography", Vol C, (A.J.C. Wilson, ed.), Kluwer Academic Publishers, Boston, Table 4.2.4.3, pages 200-206 (1992).

(10) CrystalStructure 4.2: Crystal Structure Analysis Package, Rigaku Corporation (2000-2015). Tokyo 196-8666, Japan.

(11) SHELXL Version 2014/7: Sheldrick, G. M. (2008). Acta Cryst. A64, 112-122.

## EXPERIMENTAL DETAILS

### A. Crystal Data

|                      |                                                                                                             |
|----------------------|-------------------------------------------------------------------------------------------------------------|
| Empirical Formula    | C <sub>23</sub> H <sub>31</sub> NO <sub>5</sub>                                                             |
| Formula Weight       | 401.50                                                                                                      |
| Crystal Color, Habit | colorless, platelet                                                                                         |
| Crystal Dimensions   | 0.290 X 0.220 X 0.050 mm                                                                                    |
| Crystal System       | monoclinic                                                                                                  |
| Lattice Type         | Primitive                                                                                                   |
| Lattice Parameters   | a = 8.5456(2) Å<br>b = 9.8717(3) Å<br>c = 12.8048(3) Å<br>β = 104.479(7) °<br>V = 1045.90(6) Å <sup>3</sup> |
| Space Group          | P2 <sub>1</sub> (#4)                                                                                        |
| Z value              | 2                                                                                                           |
| D <sub>calc</sub>    | 1.275 g/cm <sup>3</sup>                                                                                     |
| F <sub>000</sub>     | 432.00                                                                                                      |
| μ(CuKα)              | 7.246 cm <sup>-1</sup>                                                                                      |

## B. Intensity Measurements

|                                                        |                                                                            |
|--------------------------------------------------------|----------------------------------------------------------------------------|
| Diffractometer                                         | R-AXIS RAPID                                                               |
| Radiation                                              | CuK $\alpha$ ( $\lambda = 1.54187 \text{ \AA}$ )<br>graphite monochromated |
| Voltage, Current                                       | 50kV, 40mA                                                                 |
| Temperature                                            | 23.0°C                                                                     |
| Detector Aperture                                      | 460.0 x 256.0 mm                                                           |
| Data Images                                            | 180 exposures                                                              |
| $\omega$ oscillation Range ( $\chi=54.0, \phi=0.0$ )   | 80.0 - 260.0°                                                              |
| Exposure Rate                                          | 60.0 sec./°                                                                |
| $\omega$ oscillation Range ( $\chi=54.0, \phi=90.0$ )  | 80.0 - 260.0°                                                              |
| Exposure Rate                                          | 60.0 sec./°                                                                |
| $\omega$ oscillation Range ( $\chi=54.0, \phi=180.0$ ) | 80.0 - 260.0°                                                              |
| Exposure Rate                                          | 60.0 sec./°                                                                |
| $\omega$ oscillation Range ( $\chi=54.0, \phi=270.0$ ) | 80.0 - 260.0°                                                              |
| Exposure Rate                                          | 60.0 sec./°                                                                |
| $\omega$ oscillation Range ( $\chi=0.0, \phi=0.0$ )    | 80.0 - 260.0°                                                              |
| Exposure Rate                                          | 60.0 sec./°                                                                |
| Detector Position                                      | 127.40 mm                                                                  |
| Pixel Size                                             | 0.100 mm                                                                   |

$2\theta_{\max}$

136.4°

No. of Reflections Measured

Total: 11959

Unique: 3680 ( $R_{\text{int}} = 0.0563$ )

Parsons quotients (Flack x parameter):

940

Corrections

Lorentz-polarization

Absorption

(trans. factors: 0.679 - 0.964)

### C. Structure Solution and Refinement

|                                            |                                                                                                                        |
|--------------------------------------------|------------------------------------------------------------------------------------------------------------------------|
| Structure Solution<br>2014/5)              | Direct Methods (SHELXT Version                                                                                         |
| Refinement                                 | Full-matrix least-squares on F <sup>2</sup>                                                                            |
| Function Minimized                         | $\sum w (F_o^2 - F_c^2)^2$                                                                                             |
| Least Squares Weights                      | $w = 1 / [ \sigma^2(F_o^2) + (0.0777 \cdot P)^2 + 0.0402 \cdot P ]$<br>where $P = (\text{Max}(F_o^2, 0) + 2F_c^2) / 3$ |
| 2 $\theta_{\text{max}}$ cutoff             | 136.4 $^\circ$                                                                                                         |
| Anomalous Dispersion                       | All non-hydrogen atoms                                                                                                 |
| No. Observations (All reflections)         | 3680                                                                                                                   |
| No. Variables                              | 270                                                                                                                    |
| Reflection/Parameter Ratio                 | 13.63                                                                                                                  |
| Residuals: R1 ( $I > 2.00\sigma(I)$ )      | 0.0600                                                                                                                 |
| Residuals: R (All reflections)             | 0.0755                                                                                                                 |
| Residuals: wR2 (All reflections)           | 0.1543                                                                                                                 |
| Goodness of Fit Indicator                  | 1.111                                                                                                                  |
| Flack parameter (Parsons' quotients = 940) | 0.11(16)                                                                                                               |
| Max Shift/Error in Final Cycle             | 0.001                                                                                                                  |
| Maximum peak in Final Diff. Map            | 0.20 e <sup>-</sup> /Å <sup>3</sup>                                                                                    |
| Minimum peak in Final Diff. Map            | -0.29 e <sup>-</sup> /Å <sup>3</sup>                                                                                   |

Table S18. Atomic coordinates and  $B_{\text{iso}}/B_{\text{eq}}$ 

| atom | x          | y         | z          | $B_{\text{eq}}$ |
|------|------------|-----------|------------|-----------------|
| O1   | 0.2895(4)  | 0.5676(3) | 0.2531(2)  | 2.31(6)         |
| O2   | 0.3227(4)  | 0.4295(3) | 0.1122(3)  | 2.46(6)         |
| O3   | 0.6297(4)  | 0.3762(3) | 0.2944(3)  | 2.80(7)         |
| O4   | 0.7438(4)  | 0.6663(4) | 0.2623(3)  | 3.09(7)         |
| O5   | -0.0563(5) | 0.3163(5) | 0.2679(4)  | 4.67(10)        |
| N6   | 0.0179(5)  | 0.5438(5) | 0.3938(4)  | 3.13(9)         |
| C7   | 0.2950(6)  | 0.4989(5) | 0.4697(4)  | 2.46(9)         |
| C8   | 0.4447(5)  | 0.4693(5) | 0.4268(3)  | 2.21(8)         |
| C9   | 0.4475(5)  | 0.5474(5) | 0.3240(4)  | 2.25(8)         |
| C10  | 0.5688(6)  | 0.4859(5) | 0.2655(4)  | 2.42(9)         |
| C11  | 0.2196(6)  | 0.4586(5) | 0.1810(4)  | 2.39(9)         |
| C12  | 0.2029(6)  | 0.3282(5) | 0.2385(4)  | 2.48(9)         |
| C13  | 0.5982(6)  | 0.4873(5) | 0.5129(4)  | 2.67(9)         |
| C14  | 0.6378(5)  | 0.5744(5) | 0.1903(4)  | 2.66(9)         |
| C15  | 0.1339(6)  | 0.4634(5) | 0.3915(4)  | 2.66(9)         |
| C16  | 0.2655(6)  | 0.6490(5) | 0.4891(4)  | 2.82(10)        |
| C17  | 0.1062(6)  | 0.3382(6) | 0.3237(4)  | 3.00(10)        |
| C18  | 0.3131(7)  | 0.4155(6) | 0.5733(4)  | 3.22(11)        |
| C19  | 0.5255(6)  | 0.6619(6) | 0.1070(4)  | 2.96(10)        |
| C20  | 0.4336(6)  | 0.5880(6) | 0.0041(4)  | 2.97(10)        |
| C21  | 0.6113(6)  | 0.4760(5) | 0.6186(4)  | 2.96(10)        |
| C22  | 0.2822(6)  | 0.5173(5) | 0.0163(4)  | 2.82(10)        |
| C23  | 0.0696(6)  | 0.5223(6) | 0.1090(4)  | 2.93(10)        |
| C24  | 0.7701(8)  | 0.4779(6) | 0.6953(5)  | 3.83(12)        |
| C25  | 0.4636(6)  | 0.4536(6) | 0.6611(4)  | 3.41(11)        |
| C26  | 0.1427(6)  | 0.6064(5) | 0.0321(4)  | 3.10(10)        |
| C27  | 0.0809(6)  | 0.6572(6) | 0.4701(5)  | 3.53(11)        |
| C28  | 0.3887(7)  | 0.6847(6) | -0.0916(4) | 4.12(13)        |
| C29  | 0.8024(9)  | 0.4571(7) | 0.8008(5)  | 5.39(16)        |

$$B_{\text{eq}} = 8/3 \pi^2 (U_{11}(aa^*)^2 + U_{22}(bb^*)^2 + U_{33}(cc^*)^2 + 2U_{12}(aa^*bb^*)\cos \gamma + 2U_{13}(aa^*cc^*)\cos \beta + 2U_{23}(bb^*cc^*)\cos \alpha)$$

Table S19. Atomic coordinates and B<sub>iso</sub> involving hydrogen atoms

| atom | x        | y       | z        | B <sub>iso</sub> |
|------|----------|---------|----------|------------------|
| H4   | 0.80812  | 0.62293 | 0.30843  | 3.705            |
| H8   | 0.43899  | 0.37309 | 0.40735  | 2.655            |
| H9   | 0.48863  | 0.63797 | 0.34763  | 2.702            |
| H12A | 0.31022  | 0.29502 | 0.27294  | 2.970            |
| H12B | 0.15160  | 0.26162 | 0.18518  | 2.970            |
| H13  | 0.69137  | 0.50783 | 0.49110  | 3.203            |
| H14  | 0.70226  | 0.51766 | 0.15410  | 3.195            |
| H16A | 0.30294  | 0.70625 | 0.43866  | 3.383            |
| H16B | 0.31952  | 0.67573 | 0.56209  | 3.383            |
| H17  | 0.13856  | 0.26124 | 0.37268  | 3.600            |
| H18A | 0.21822  | 0.42897 | 0.60067  | 3.866            |
| H18B | 0.31849  | 0.32013 | 0.55619  | 3.866            |
| H19A | 0.58840  | 0.73434 | 0.08642  | 3.553            |
| H19B | 0.44709  | 0.70325 | 0.14034  | 3.553            |
| H20  | 0.50591  | 0.51893 | -0.01272 | 3.562            |
| H22  | 0.24161  | 0.46010 | -0.04725 | 3.380            |
| H23A | 0.01387  | 0.57916 | 0.14986  | 3.513            |
| H23B | -0.00436 | 0.45410 | 0.07039  | 3.513            |
| H24  | 0.86510  | 0.49892 | 0.66138  | 4.467            |
| H25A | 0.44158  | 0.53561 | 0.69657  | 4.090            |
| H25B | 0.48631  | 0.38200 | 0.71465  | 4.090            |
| H26A | 0.06406  | 0.62212 | -0.03584 | 3.719            |
| H26B | 0.18218  | 0.69287 | 0.06404  | 3.719            |
| H27A | 0.04934  | 0.64554 | 0.53721  | 4.240            |
| H27B | 0.04060  | 0.74369 | 0.43862  | 4.240            |
| H28A | 0.48412  | 0.73016 | -0.10010 | 4.947            |
| H28B | 0.34137  | 0.63435 | -0.15594 | 4.947            |
| H28C | 0.31252  | 0.75032 | -0.07921 | 4.947            |
| H29A | 0.71896  | 0.43889 | 0.83349  | 6.463            |
| H29B | 0.90861  | 0.46065 | 0.84222  | 6.463            |
| H30  | -0.10986 | 0.35312 | 0.30298  | 12.653           |



Table S20. Anisotropic displacement parameters

| atom | U <sub>11</sub> | U <sub>22</sub> | U <sub>33</sub> | U <sub>12</sub> | U <sub>13</sub> | U <sub>23</sub> |
|------|-----------------|-----------------|-----------------|-----------------|-----------------|-----------------|
| O1   | 0.0270(17)      | 0.0240(17)      | 0.0345(17)      | -0.0014(14)     | 0.0032(13)      | -0.0032(15)     |
| O2   | 0.0342(19)      | 0.0277(18)      | 0.0333(18)      | 0.0019(15)      | 0.0116(15)      | 0.0016(15)      |
| O3   | 0.0337(19)      | 0.0281(19)      | 0.044(2)        | 0.0021(16)      | 0.0093(16)      | 0.0024(16)      |
| O4   | 0.034(2)        | 0.036(2)        | 0.044(2)        | -0.0042(17)     | 0.0042(16)      | -0.0004(18)     |
| O5   | 0.031(2)        | 0.068(3)        | 0.080(3)        | -0.011(2)       | 0.017(2)        | -0.032(3)       |
| N6   | 0.033(2)        | 0.038(3)        | 0.049(3)        | 0.002(2)        | 0.014(2)        | -0.007(2)       |
| C7   | 0.030(3)        | 0.029(3)        | 0.037(3)        | 0.004(2)        | 0.012(2)        | -0.002(2)       |
| C8   | 0.028(2)        | 0.027(3)        | 0.028(2)        | 0.001(2)        | 0.005(2)        | 0.002(2)        |
| C9   | 0.025(2)        | 0.028(3)        | 0.029(2)        | 0.001(2)        | 0.0025(19)      | 0.002(2)        |
| C10  | 0.030(3)        | 0.028(3)        | 0.032(3)        | -0.003(2)       | 0.004(2)        | 0.001(2)        |
| C11  | 0.028(3)        | 0.025(3)        | 0.037(3)        | -0.003(2)       | 0.007(2)        | -0.002(2)       |
| C12  | 0.031(3)        | 0.030(3)        | 0.034(3)        | -0.006(2)       | 0.009(2)        | -0.004(2)       |
| C13  | 0.033(3)        | 0.028(3)        | 0.038(3)        | 0.003(2)        | 0.005(2)        | 0.000(2)        |
| C14  | 0.029(3)        | 0.034(3)        | 0.037(3)        | -0.006(2)       | 0.006(2)        | 0.002(2)        |
| C15  | 0.030(3)        | 0.034(3)        | 0.038(3)        | -0.001(2)       | 0.011(2)        | -0.004(2)       |
| C16  | 0.042(3)        | 0.028(3)        | 0.040(3)        | 0.001(2)        | 0.015(2)        | -0.004(2)       |
| C17  | 0.031(3)        | 0.041(3)        | 0.042(3)        | -0.008(2)       | 0.011(2)        | -0.005(3)       |
| C18  | 0.049(3)        | 0.038(3)        | 0.038(3)        | -0.002(3)       | 0.016(3)        | 0.002(2)        |
| C19  | 0.044(3)        | 0.030(3)        | 0.038(3)        | -0.003(2)       | 0.009(2)        | 0.002(2)        |
| C20  | 0.045(3)        | 0.039(3)        | 0.030(3)        | 0.002(3)        | 0.012(2)        | 0.005(2)        |
| C21  | 0.047(3)        | 0.025(3)        | 0.034(3)        | -0.002(2)       | -0.002(2)       | 0.000(2)        |
| C22  | 0.039(3)        | 0.032(3)        | 0.031(3)        | -0.003(2)       | 0.001(2)        | 0.006(2)        |
| C23  | 0.029(3)        | 0.039(3)        | 0.038(3)        | 0.002(2)        | -0.001(2)       | -0.001(2)       |
| C24  | 0.055(4)        | 0.031(3)        | 0.046(3)        | -0.002(3)       | -0.012(3)       | 0.001(3)        |
| C25  | 0.059(4)        | 0.037(3)        | 0.032(3)        | -0.002(3)       | 0.009(3)        | -0.005(2)       |
| C26  | 0.041(3)        | 0.035(3)        | 0.035(3)        | 0.003(2)        | -0.003(2)       | 0.002(2)        |
| C27  | 0.043(3)        | 0.036(3)        | 0.059(4)        | 0.009(3)        | 0.018(3)        | -0.016(3)       |
| C28  | 0.069(4)        | 0.044(4)        | 0.043(3)        | -0.006(3)       | 0.013(3)        | 0.012(3)        |
| C29  | 0.088(5)        | 0.054(4)        | 0.043(3)        | -0.016(4)       | -0.020(3)       | 0.010(3)        |

The general temperature factor expression:  $\exp(-2\pi^2(a^2U_{11}h^2 + b^2U_{22}k^2 + c^2U_{33}l^2 + 2a^*b^*U_{12}hk + 2a^*c^*U_{13}hl + 2b^*c^*U_{23}kl))$

Table S21. Bond lengths (Å)

| atom | atom | distance | atom | atom | distance |
|------|------|----------|------|------|----------|
| O1   | C9   | 1.441(5) | O1   | C11  | 1.446(5) |
| O2   | C11  | 1.423(7) | O2   | C22  | 1.471(6) |
| O3   | C10  | 1.219(6) | O4   | C14  | 1.441(6) |
| O5   | C17  | 1.410(6) | N6   | C15  | 1.276(7) |
| N6   | C27  | 1.494(7) | C7   | C8   | 1.542(7) |
| C7   | C15  | 1.527(6) | C7   | C16  | 1.534(7) |
| C7   | C18  | 1.535(7) | C8   | C9   | 1.531(7) |
| C8   | C13  | 1.498(6) | C9   | C10  | 1.546(7) |
| C10  | C14  | 1.523(7) | C11  | C12  | 1.507(7) |
| C11  | C23  | 1.516(6) | C12  | C17  | 1.527(8) |
| C13  | C21  | 1.334(7) | C14  | C19  | 1.515(7) |
| C15  | C17  | 1.495(7) | C16  | C27  | 1.537(7) |
| C18  | C25  | 1.528(7) | C19  | C20  | 1.538(7) |
| C20  | C22  | 1.513(8) | C20  | C28  | 1.525(8) |
| C21  | C24  | 1.463(7) | C21  | C25  | 1.510(8) |
| C22  | C26  | 1.535(8) | C23  | C26  | 1.535(8) |
| C24  | C29  | 1.327(8) |      |      |          |

Table S22. Bond lengths involving hydrogens (Å)

| atom | atom | distance | atom | atom | distance |
|------|------|----------|------|------|----------|
| O4   | H4   | 0.820    | O5   | H30  | 0.804    |
| C8   | H8   | 0.980    | C9   | H9   | 0.980    |
| C12  | H12A | 0.970    | C12  | H12B | 0.970    |
| C13  | H13  | 0.930    | C14  | H14  | 0.980    |
| C16  | H16A | 0.970    | C16  | H16B | 0.970    |
| C17  | H17  | 0.980    | C18  | H18A | 0.970    |
| C18  | H18B | 0.970    | C19  | H19A | 0.970    |
| C19  | H19B | 0.970    | C20  | H20  | 0.980    |
| C22  | H22  | 0.980    | C23  | H23A | 0.970    |
| C23  | H23B | 0.970    | C24  | H24  | 1.033    |
| C25  | H25A | 0.970    | C25  | H25B | 0.970    |
| C26  | H26A | 0.970    | C26  | H26B | 0.970    |
| C27  | H27A | 0.970    | C27  | H27B | 0.970    |
| C28  | H28A | 0.960    | C28  | H28B | 0.960    |
| C28  | H28C | 0.960    | C29  | H29A | 0.930    |
| C29  | H29B | 0.930    |      |      |          |

Table S23. Bond angles (°)

| atom | atom | atom | angle    | atom | atom | atom | angle    |
|------|------|------|----------|------|------|------|----------|
| C9   | O1   | C11  | 118.2(3) | C11  | O2   | C22  | 110.2(3) |
| C15  | N6   | C27  | 109.0(4) | C8   | C7   | C15  | 114.5(4) |
| C8   | C7   | C16  | 115.2(4) | C8   | C7   | C18  | 107.0(4) |
| C15  | C7   | C16  | 99.8(4)  | C15  | C7   | C18  | 108.9(4) |
| C16  | C7   | C18  | 111.3(4) | C7   | C8   | C9   | 113.8(4) |
| C7   | C8   | C13  | 111.5(4) | C9   | C8   | C13  | 112.0(4) |
| O1   | C9   | C8   | 113.5(4) | O1   | C9   | C10  | 112.6(4) |
| C8   | C9   | C10  | 112.0(4) | O3   | C10  | C9   | 119.3(4) |
| O3   | C10  | C14  | 119.9(5) | C9   | C10  | C14  | 119.6(4) |
| O1   | C11  | O2   | 108.9(4) | O1   | C11  | C12  | 113.5(4) |
| O1   | C11  | C23  | 103.4(4) | O2   | C11  | C12  | 106.2(4) |
| O2   | C11  | C23  | 105.5(4) | C12  | C11  | C23  | 118.9(4) |
| C11  | C12  | C17  | 115.3(4) | C8   | C13  | C21  | 125.0(5) |
| O4   | C14  | C10  | 103.8(4) | O4   | C14  | C19  | 106.1(4) |
| C10  | C14  | C19  | 119.7(4) | N6   | C15  | C7   | 114.8(4) |
| N6   | C15  | C17  | 121.1(4) | C7   | C15  | C17  | 123.8(4) |
| C7   | C16  | C27  | 103.2(4) | O5   | C17  | C12  | 105.6(4) |
| O5   | C17  | C15  | 114.5(5) | C12  | C17  | C15  | 115.6(5) |
| C7   | C18  | C25  | 112.8(5) | C14  | C19  | C20  | 115.5(4) |
| C19  | C20  | C22  | 113.4(4) | C19  | C20  | C28  | 111.4(4) |
| C22  | C20  | C28  | 108.8(4) | C13  | C21  | C24  | 120.5(5) |
| C13  | C21  | C25  | 120.8(4) | C24  | C21  | C25  | 118.6(5) |
| O2   | C22  | C20  | 109.2(4) | O2   | C22  | C26  | 104.8(4) |
| C20  | C22  | C26  | 117.5(4) | C11  | C23  | C26  | 101.4(4) |
| C21  | C24  | C29  | 127.2(7) | C18  | C25  | C21  | 113.4(4) |
| C22  | C26  | C23  | 103.2(4) | N6   | C27  | C16  | 104.6(4) |

Table S24. Bond angles involving hydrogens (°)

| atom | atom | atom | angle | atom | atom | atom | angle |
|------|------|------|-------|------|------|------|-------|
| C14  | O4   | H4   | 109.5 | C17  | O5   | H30  | 105.9 |
| C7   | C8   | H8   | 106.3 | C9   | C8   | H8   | 106.3 |
| C13  | C8   | H8   | 106.3 | O1   | C9   | H9   | 106.0 |
| C8   | C9   | H9   | 106.0 | C10  | C9   | H9   | 106.0 |
| C11  | C12  | H12A | 108.4 | C11  | C12  | H12B | 108.4 |
| C17  | C12  | H12A | 108.4 | C17  | C12  | H12B | 108.4 |
| H12A | C12  | H12B | 107.5 | C8   | C13  | H13  | 117.5 |
| C21  | C13  | H13  | 117.5 | O4   | C14  | H14  | 108.9 |
| C10  | C14  | H14  | 108.9 | C19  | C14  | H14  | 108.9 |
| C7   | C16  | H16A | 111.1 | C7   | C16  | H16B | 111.1 |
| C27  | C16  | H16A | 111.1 | C27  | C16  | H16B | 111.1 |
| H16A | C16  | H16B | 109.1 | O5   | C17  | H17  | 106.9 |
| C12  | C17  | H17  | 106.9 | C15  | C17  | H17  | 106.9 |
| C7   | C18  | H18A | 109.0 | C7   | C18  | H18B | 109.0 |
| C25  | C18  | H18A | 109.0 | C25  | C18  | H18B | 109.0 |
| H18A | C18  | H18B | 107.8 | C14  | C19  | H19A | 108.4 |
| C14  | C19  | H19B | 108.4 | C20  | C19  | H19A | 108.4 |
| C20  | C19  | H19B | 108.4 | H19A | C19  | H19B | 107.5 |
| C19  | C20  | H20  | 107.7 | C22  | C20  | H20  | 107.7 |
| C28  | C20  | H20  | 107.7 | O2   | C22  | H22  | 108.3 |
| C20  | C22  | H22  | 108.3 | C26  | C22  | H22  | 108.3 |
| C11  | C23  | H23A | 111.5 | C11  | C23  | H23B | 111.5 |
| C26  | C23  | H23A | 111.5 | C26  | C23  | H23B | 111.5 |
| H23A | C23  | H23B | 109.3 | C21  | C24  | H24  | 114.6 |
| C29  | C24  | H24  | 118.3 | C18  | C25  | H25A | 108.9 |
| C18  | C25  | H25B | 108.9 | C21  | C25  | H25A | 108.9 |
| C21  | C25  | H25B | 108.9 | H25A | C25  | H25B | 107.7 |
| C22  | C26  | H26A | 111.1 | C22  | C26  | H26B | 111.1 |
| C23  | C26  | H26A | 111.1 | C23  | C26  | H26B | 111.1 |
| H26A | C26  | H26B | 109.1 | N6   | C27  | H27A | 110.8 |
| N6   | C27  | H27B | 110.8 | C16  | C27  | H27A | 110.8 |
| C16  | C27  | H27B | 110.8 | H27A | C27  | H27B | 108.9 |
| C20  | C28  | H28A | 109.5 | C20  | C28  | H28B | 109.5 |
| C20  | C28  | H28C | 109.5 | H28A | C28  | H28B | 109.5 |
| H28A | C28  | H28C | 109.5 | H28B | C28  | H28C | 109.5 |
| C24  | C29  | H29A | 120.0 | C24  | C29  | H29B | 120.0 |
| H29A | C29  | H29B | 120.0 |      |      |      |       |

Table S25. Torsion Angles(°)

(Those having bond angles &gt; 160 or &lt; 20 degrees are excluded.)

| atom1 | atom2 | atom3 | atom4 | angle     | atom1 | atom2 | atom3 | atom4 | angle     |
|-------|-------|-------|-------|-----------|-------|-------|-------|-------|-----------|
| C9    | O1    | C11   | O2    | -59.9(5)  | C9    | O1    | C11   | C12   | 58.2(5)   |
| C9    | O1    | C11   | C23   | -171.7(3) | C11   | O1    | C9    | C8    | -82.4(5)  |
| C11   | O1    | C9    | C10   | 46.2(5)   | C11   | O2    | C22   | C20   | 127.2(3)  |
| C11   | O2    | C22   | C26   | 0.4(4)    | C22   | O2    | C11   | O1    | -87.1(4)  |
| C22   | O2    | C11   | C12   | 150.3(3)  | C22   | O2    | C11   | C23   | 23.3(4)   |
| C15   | N6    | C27   | C16   | 15.0(6)   | C27   | N6    | C15   | C7    | 3.9(6)    |
| C27   | N6    | C15   | C17   | 178.6(4)  | C8    | C7    | C15   | N6    | -144.3(4) |
| C8    | C7    | C15   | C17   | 41.1(6)   | C15   | C7    | C8    | C9    | 60.4(5)   |
| C15   | C7    | C8    | C13   | -171.7(4) | C8    | C7    | C16   | C27   | 150.5(3)  |
| C16   | C7    | C8    | C9    | -54.5(5)  | C16   | C7    | C8    | C13   | 73.4(5)   |
| C8    | C7    | C18   | C25   | 61.1(5)   | C18   | C7    | C8    | C9    | -178.8(3) |
| C18   | C7    | C8    | C13   | -50.9(5)  | C15   | C7    | C16   | C27   | 27.4(5)   |
| C16   | C7    | C15   | N6    | -20.8(6)  | C16   | C7    | C15   | C17   | 164.7(4)  |
| C15   | C7    | C18   | C25   | -174.6(4) | C18   | C7    | C15   | N6    | 95.9(5)   |
| C18   | C7    | C15   | C17   | -78.7(6)  | C16   | C7    | C18   | C25   | -65.5(5)  |
| C18   | C7    | C16   | C27   | -87.4(4)  | C7    | C8    | C9    | O1    | -34.3(5)  |
| C7    | C8    | C9    | C10   | -163.2(3) | C7    | C8    | C13   | C21   | 25.3(6)   |
| C9    | C8    | C13   | C21   | 154.2(4)  | C13   | C8    | C9    | O1    | -162.0(4) |
| C13   | C8    | C9    | C10   | 69.1(5)   | O1    | C9    | C10   | O3    | -118.8(4) |
| O1    | C9    | C10   | C14   | 74.3(5)   | C8    | C9    | C10   | O3    | 10.5(5)   |
| C8    | C9    | C10   | C14   | -156.4(3) | O3    | C10   | C14   | O4    | -96.5(5)  |
| O3    | C10   | C14   | C19   | 145.6(4)  | C9    | C10   | C14   | O4    | 70.4(4)   |
| C9    | C10   | C14   | C19   | -47.6(5)  | O1    | C11   | C12   | C17   | 56.1(5)   |
| O1    | C11   | C23   | C26   | 77.4(4)   | O2    | C11   | C12   | C17   | 175.7(3)  |
| O2    | C11   | C23   | C26   | -36.9(4)  | C12   | C11   | C23   | C26   | -155.8(4) |
| C23   | C11   | C12   | C17   | -65.8(5)  | C11   | C12   | C17   | O5    | 88.0(4)   |
| C11   | C12   | C17   | C15   | -39.6(5)  | C8    | C13   | C21   | C24   | 171.9(4)  |
| C8    | C13   | C21   | C25   | -4.8(8)   | O4    | C14   | C19   | C20   | 163.5(4)  |
| C10   | C14   | C19   | C20   | -79.8(6)  | N6    | C15   | C17   | O5    | -2.2(7)   |
| N6    | C15   | C17   | C12   | 120.8(5)  | C7    | C15   | C17   | O5    | 172.1(4)  |
| C7    | C15   | C17   | C12   | -64.9(6)  | C7    | C16   | C27   | N6    | -26.9(5)  |
| C7    | C18   | C25   | C21   | -41.8(6)  | C14   | C19   | C20   | C22   | 83.1(5)   |
| C14   | C19   | C20   | C28   | -153.8(4) | C19   | C20   | C22   | O2    | -52.4(5)  |
| C19   | C20   | C22   | C26   | 66.8(5)   | C28   | C20   | C22   | O2    | -176.9(4) |
| C28   | C20   | C22   | C26   | -57.7(5)  | C13   | C21   | C24   | C29   | -174.2(5) |
| C13   | C21   | C25   | C18   | 12.5(7)   | C24   | C21   | C25   | C18   | -164.3(4) |
| C25   | C21   | C24   | C29   | 2.6(8)    | O2    | C22   | C26   | C23   | -23.4(4)  |

Table S25. Torsion angles ( $^{\circ}$ ) (continued)

| atom1 | atom2 | atom3 | atom4 | angle     | atom1 | atom2 | atom3 | atom4 | angle   |
|-------|-------|-------|-------|-----------|-------|-------|-------|-------|---------|
| C20   | C22   | C26   | C23   | -144.9(4) | C11   | C23   | C26   | C22   | 36.3(4) |

Table S26. Possible hydrogen bonds

| Donor | H   | Acceptor        | D...A    | D-H  | H...A | D-H...A |           |
|-------|-----|-----------------|----------|------|-------|---------|-----------|
| O4    | H4  | N6 <sup>1</sup> | 2.795(5) | 0.82 | 2.01  | 160.28  |           |
| O5    | H30 | O3 <sup>2</sup> | 2.850(6) | 0.80 | 2.21  | 136.49  |           |
| O5    | H30 | N6              | 2.745(6) | 0.80 | 2.34  | 112.46  | intramol. |

Symmetry Operators:

(1) X+1,Y,Z

(2) X-1,Y,Z



Table S27. Intramolecular contacts less than 3.60 Å

| atom | atom | distance | atom | atom | distance |
|------|------|----------|------|------|----------|
| O1   | O3   | 3.396(4) | O1   | N6   | 3.284(6) |
| O1   | C7   | 2.845(6) | O1   | C14  | 3.271(6) |
| O1   | C15  | 2.673(6) | O1   | C16  | 3.183(6) |
| O1   | C17  | 3.018(7) | O1   | C19  | 3.212(7) |
| O1   | C22  | 3.057(6) | O1   | C26  | 2.819(6) |
| O2   | O3   | 3.090(4) | O2   | C9   | 2.899(5) |
| O2   | C10  | 2.554(5) | O2   | C14  | 2.991(5) |
| O2   | C19  | 2.886(6) | O3   | O4   | 3.086(5) |
| O3   | C8   | 2.748(6) | O3   | C11  | 3.537(5) |
| O3   | C12  | 3.568(6) | O3   | C13  | 3.079(6) |
| O4   | C9   | 3.067(6) | O5   | N6   | 2.745(6) |
| O5   | C11  | 3.174(7) | O5   | C23  | 3.244(7) |
| N6   | C12  | 3.543(7) | N6   | C18  | 3.217(6) |
| C7   | C12  | 3.325(7) | C7   | C21  | 2.901(6) |
| C8   | C11  | 3.254(6) | C8   | C12  | 3.087(6) |
| C8   | C17  | 3.143(6) | C8   | C25  | 2.968(7) |
| C9   | C12  | 3.018(7) | C9   | C15  | 3.127(7) |
| C9   | C16  | 3.088(8) | C9   | C17  | 3.574(7) |
| C9   | C19  | 3.220(7) | C10  | C11  | 2.921(6) |
| C10  | C12  | 3.432(7) | C10  | C13  | 3.115(7) |
| C10  | C20  | 3.409(7) | C10  | C22  | 3.517(6) |
| C11  | C15  | 2.964(8) | C11  | C20  | 3.490(8) |
| C13  | C16  | 3.208(7) | C13  | C18  | 2.824(8) |
| C14  | C22  | 3.336(6) | C15  | C23  | 3.568(7) |
| C16  | C21  | 3.457(7) | C16  | C25  | 3.094(7) |
| C17  | C18  | 3.331(7) | C17  | C23  | 3.245(8) |
| C18  | C27  | 3.173(8) | C19  | C26  | 3.217(7) |
| C25  | C29  | 3.000(8) | C26  | C28  | 3.033(9) |

Table S28. Intramolecular contacts less than 3.60 Å involving hydrogens

| atom | atom | distance | atom | atom | distance |
|------|------|----------|------|------|----------|
| O1   | H8   | 2.821    | O1   | H12A | 2.705    |
| O1   | H12B | 3.280    | O1   | H16A | 2.720    |
| O1   | H19B | 2.581    | O1   | H23A | 2.398    |
| O1   | H23B | 3.177    | O1   | H26B | 2.668    |
| O2   | H12A | 2.474    | O2   | H12B | 2.538    |
| O2   | H14  | 3.271    | O2   | H19B | 2.893    |
| O2   | H20  | 2.653    | O2   | H23A | 3.165    |
| O2   | H23B | 2.722    | O2   | H26A | 3.162    |
| O2   | H26B | 2.866    | O3   | H4   | 2.855    |
| O3   | H8   | 2.434    | O3   | H9   | 3.001    |
| O3   | H12A | 2.792    | O3   | H13  | 2.765    |
| O3   | H14  | 2.474    | O4   | H9   | 2.686    |
| O4   | H13  | 3.448    | O4   | H19A | 2.406    |
| O4   | H19B | 2.649    | O5   | H12A | 3.123    |
| O5   | H12B | 2.347    | O5   | H23A | 3.135    |
| O5   | H23B | 3.001    | N6   | H16A | 2.852    |
| N6   | H16B | 3.195    | N6   | H17  | 3.009    |
| N6   | H18A | 2.994    | N6   | H23A | 3.135    |
| N6   | H30  | 2.335    | C7   | H9   | 2.891    |
| C7   | H12A | 3.252    | C7   | H13  | 3.330    |
| C7   | H17  | 2.829    | C7   | H25A | 2.884    |
| C7   | H25B | 3.358    | C7   | H27A | 2.856    |
| C7   | H27B | 3.208    | C8   | H12A | 2.651    |
| C8   | H16A | 2.656    | C8   | H16B | 3.038    |
| C8   | H17  | 3.262    | C8   | H18A | 3.319    |
| C8   | H18B | 2.641    | C8   | H25A | 3.523    |
| C9   | H4   | 3.225    | C9   | H12A | 2.762    |
| C9   | H13  | 2.616    | C9   | H14  | 3.453    |
| C9   | H16A | 2.655    | C9   | H19B | 2.809    |
| C10  | H4   | 2.398    | C10  | H8   | 2.603    |
| C10  | H12A | 2.924    | C10  | H13  | 2.824    |
| C10  | H19A | 3.390    | C10  | H19B | 2.724    |
| C10  | H20  | 3.483    | C11  | H8   | 3.148    |
| C11  | H9   | 3.243    | C11  | H17  | 3.338    |
| C11  | H19B | 3.224    | C11  | H22  | 2.976    |
| C11  | H26A | 3.200    | C11  | H26B | 2.731    |
| C12  | H8   | 2.600    | C12  | H23A | 3.019    |

Table S28. Intramolecular contacts less than 3.60 Å involving hydrogens (continued)

| atom | atom | distance | atom | atom | distance |
|------|------|----------|------|------|----------|
| C12  | H23B | 2.722    | C12  | H30  | 2.998    |
| C13  | H9   | 2.565    | C13  | H16A | 3.278    |
| C13  | H16B | 3.206    | C13  | H18B | 3.067    |
| C13  | H24  | 2.581    | C13  | H25A | 3.020    |
| C13  | H25B | 3.146    | C14  | H9   | 2.713    |
| C14  | H20  | 2.620    | C15  | H8   | 2.714    |
| C15  | H12A | 2.912    | C15  | H12B | 3.342    |
| C15  | H16A | 2.786    | C15  | H16B | 3.154    |
| C15  | H18A | 2.616    | C15  | H18B | 2.697    |
| C15  | H23A | 3.216    | C15  | H27A | 2.813    |
| C15  | H27B | 2.983    | C15  | H30  | 2.372    |
| C16  | H8   | 3.390    | C16  | H9   | 2.942    |
| C16  | H18A | 2.686    | C16  | H18B | 3.360    |
| C16  | H25A | 2.929    | C17  | H8   | 2.799    |
| C17  | H18A | 3.550    | C17  | H18B | 3.080    |
| C17  | H23A | 3.218    | C17  | H23B | 3.345    |
| C18  | H8   | 2.643    | C18  | H16A | 3.338    |
| C18  | H16B | 2.574    | C18  | H17  | 3.037    |
| C18  | H27A | 3.151    | C19  | H4   | 3.085    |
| C19  | H9   | 3.183    | C19  | H22  | 3.370    |
| C19  | H26B | 2.863    | C19  | H28A | 2.673    |
| C19  | H28B | 3.352    | C19  | H28C | 2.755    |
| C20  | H14  | 2.690    | C20  | H26A | 3.089    |
| C20  | H26B | 2.665    | C21  | H8   | 2.920    |
| C21  | H16B | 3.119    | C21  | H18A | 3.341    |
| C21  | H18B | 2.875    | C21  | H29A | 2.699    |
| C21  | H29B | 3.323    | C22  | H14  | 3.582    |
| C22  | H19A | 3.327    | C22  | H19B | 2.600    |
| C22  | H23A | 3.243    | C22  | H23B | 2.777    |
| C22  | H28A | 3.302    | C22  | H28B | 2.649    |
| C22  | H28C | 2.649    | C23  | H12A | 3.392    |
| C23  | H12B | 2.779    | C23  | H22  | 2.830    |
| C24  | H13  | 2.549    | C24  | H25A | 2.868    |
| C24  | H25B | 2.672    | C25  | H8   | 3.300    |
| C25  | H13  | 3.306    | C25  | H16B | 2.674    |
| C25  | H24  | 3.459    | C25  | H29A | 2.692    |
| C26  | H19B | 2.793    | C26  | H20  | 3.406    |

Table S28. Intramolecular contacts less than 3.60 Å involving hydrogens (continued)

| atom | atom | distance | atom | atom | distance |
|------|------|----------|------|------|----------|
| C26  | H28B | 3.287    | C26  | H28C | 2.682    |
| C27  | H18A | 2.875    | C28  | H19A | 2.531    |
| C28  | H19B | 2.892    | C28  | H22  | 2.679    |
| C28  | H26A | 3.096    | C28  | H26B | 2.976    |
| C29  | H25A | 3.136    | C29  | H25B | 2.752    |
| H4   | H9   | 2.901    | H4   | H13  | 2.987    |
| H4   | H14  | 2.216    | H4   | H19A | 3.186    |
| H4   | H19B | 3.385    | H8   | H9   | 2.786    |
| H8   | H12A | 1.954    | H8   | H12B | 3.441    |
| H8   | H13  | 2.533    | H8   | H16A | 3.544    |
| H8   | H17  | 2.727    | H8   | H18A | 3.511    |
| H8   | H18B | 2.439    | H9   | H13  | 2.537    |
| H9   | H16A | 2.293    | H9   | H16B | 3.428    |
| H9   | H19B | 2.667    | H12A | H17  | 2.198    |
| H12A | H23B | 3.596    | H12B | H17  | 2.431    |
| H12B | H23A | 3.339    | H12B | H23B | 2.563    |
| H12B | H30  | 3.125    | H13  | H24  | 2.312    |
| H14  | H19A | 2.419    | H14  | H19B | 2.820    |
| H14  | H20  | 2.364    | H16A | H27A | 2.831    |
| H16A | H27B | 2.272    | H16B | H18A | 2.672    |
| H16B | H18B | 3.511    | H16B | H25A | 2.251    |
| H16B | H25B | 3.587    | H16B | H27A | 2.270    |
| H16B | H27B | 2.597    | H17  | H18A | 3.276    |
| H17  | H18B | 2.533    | H17  | H30  | 2.276    |
| H18A | H25A | 2.256    | H18A | H25B | 2.433    |
| H18A | H27A | 2.594    | H18B | H25A | 2.814    |
| H18B | H25B | 2.256    | H19A | H20  | 2.487    |
| H19A | H26B | 3.436    | H19A | H28A | 2.331    |
| H19A | H28B | 3.433    | H19A | H28C | 2.753    |
| H19B | H20  | 2.810    | H19B | H22  | 3.536    |
| H19B | H26A | 3.571    | H19B | H26B | 2.232    |
| H19B | H28A | 3.184    | H19B | H28C | 2.797    |
| H20  | H22  | 2.266    | H20  | H26B | 3.595    |
| H20  | H28A | 2.352    | H20  | H28B | 2.313    |
| H20  | H28C | 2.823    | H22  | H23B | 2.876    |
| H22  | H26A | 2.234    | H22  | H26B | 2.816    |
| H22  | H28A | 3.544    | H22  | H28B | 2.493    |

Table S28. Intramolecular contacts less than 3.60 Å involving hydrogens (continued)

| atom | atom | distance | atom | atom | distance |
|------|------|----------|------|------|----------|
| H22  | H28C | 2.978    | H23A | H26A | 2.555    |
| H23A | H26B | 2.308    | H23A | H30  | 3.313    |
| H23B | H26A | 2.311    | H23B | H26B | 2.858    |
| H23B | H30  | 3.467    | H24  | H29A | 2.854    |
| H24  | H29B | 2.283    | H25A | H29A | 2.743    |
| H25B | H29A | 2.252    | H26A | H28B | 3.133    |
| H26A | H28C | 2.647    | H26B | H28B | 3.469    |
| H26B | H28C | 2.439    |      |      |          |

Table S29. Intermolecular contacts less than 3.60 Å

| atom | atom             | distance | atom | atom             | distance |
|------|------------------|----------|------|------------------|----------|
| O2   | C28 <sup>1</sup> | 3.509(7) | O3   | O5 <sup>2</sup>  | 2.850(6) |
| O3   | C16 <sup>3</sup> | 3.503(6) | O3   | C28 <sup>1</sup> | 3.184(7) |
| O4   | N6 <sup>2</sup>  | 2.795(5) | O4   | C18 <sup>4</sup> | 3.352(7) |
| O4   | C27 <sup>2</sup> | 3.399(6) | O5   | O3 <sup>5</sup>  | 2.850(6) |
| O5   | C28 <sup>6</sup> | 3.413(7) | N6   | O4 <sup>5</sup>  | 2.795(5) |
| C12  | C24 <sup>3</sup> | 3.555(7) | C13  | C16 <sup>3</sup> | 3.538(7) |
| C16  | O3 <sup>4</sup>  | 3.503(6) | C16  | C13 <sup>4</sup> | 3.538(7) |
| C18  | O4 <sup>3</sup>  | 3.352(7) | C24  | C12 <sup>4</sup> | 3.555(7) |
| C27  | O4 <sup>5</sup>  | 3.399(6) | C28  | O2 <sup>7</sup>  | 3.509(7) |
| C28  | O3 <sup>7</sup>  | 3.184(7) | C28  | O5 <sup>8</sup>  | 3.413(7) |

Symmetry Operators:

- |                       |                     |
|-----------------------|---------------------|
| (1) -X+1,Y+1/2-1,-Z   | (2) X+1,Y,Z         |
| (3) -X+1,Y+1/2-1,-Z+1 | (4) -X+1,Y+1/2,-Z+1 |
| (5) X-1,Y,Z           | (6) -X,Y+1/2-1,-Z   |
| (7) -X+1,Y+1/2,-Z     | (8) -X,Y+1/2,-Z     |

Table S30. Intermolecular contacts less than 3.60 Å involving hydrogens

| atom | atom               | distance | atom | atom               | distance |
|------|--------------------|----------|------|--------------------|----------|
| O2   | H19A <sup>1</sup>  | 3.424    | O2   | H28A <sup>1</sup>  | 2.598    |
| O3   | H16B <sup>2</sup>  | 2.661    | O3   | H25A <sup>2</sup>  | 3.424    |
| O3   | H28A <sup>1</sup>  | 2.830    | O3   | H28B <sup>1</sup>  | 3.021    |
| O3   | H28C <sup>1</sup>  | 3.172    | O3   | H30 <sup>3</sup>   | 2.213    |
| O4   | H18A <sup>4</sup>  | 3.102    | O4   | H18B <sup>4</sup>  | 2.934    |
| O4   | H23A <sup>3</sup>  | 3.131    | O4   | H25B <sup>4</sup>  | 2.963    |
| O4   | H27B <sup>3</sup>  | 3.042    | O4   | H30 <sup>3</sup>   | 3.327    |
| O5   | H4 <sup>5</sup>    | 3.328    | O5   | H14 <sup>5</sup>   | 2.971    |
| O5   | H24 <sup>2</sup>   | 3.545    | O5   | H26A <sup>6</sup>  | 3.523    |
| O5   | H27A <sup>7</sup>  | 3.000    | O5   | H28B <sup>6</sup>  | 3.078    |
| O5   | H28C <sup>6</sup>  | 2.900    | N6   | H4 <sup>5</sup>    | 2.010    |
| N6   | H13 <sup>5</sup>   | 3.347    | N6   | H14 <sup>5</sup>   | 3.553    |
| C8   | H16A <sup>2</sup>  | 3.536    | C8   | H16B <sup>2</sup>  | 3.512    |
| C9   | H18B <sup>4</sup>  | 3.473    | C9   | H25B <sup>4</sup>  | 3.408    |
| C10  | H28A <sup>1</sup>  | 3.254    | C10  | H30 <sup>3</sup>   | 2.972    |
| C12  | H24 <sup>2</sup>   | 3.595    | C13  | H16A <sup>2</sup>  | 2.921    |
| C13  | H16B <sup>2</sup>  | 3.349    | C13  | H17 <sup>4</sup>   | 3.588    |
| C13  | H18B <sup>4</sup>  | 3.522    | C14  | H23A <sup>3</sup>  | 3.382    |
| C14  | H25B <sup>4</sup>  | 3.532    | C14  | H28C <sup>1</sup>  | 3.569    |
| C14  | H30 <sup>3</sup>   | 3.154    | C15  | H4 <sup>5</sup>    | 3.144    |
| C16  | H8 <sup>4</sup>    | 3.369    | C16  | H13 <sup>4</sup>   | 3.563    |
| C17  | H24 <sup>2</sup>   | 3.360    | C17  | H27A <sup>7</sup>  | 3.121    |
| C18  | H4 <sup>2</sup>    | 3.535    | C18  | H9 <sup>2</sup>    | 3.247    |
| C18  | H27B <sup>7</sup>  | 3.436    | C19  | H25B <sup>4</sup>  | 3.172    |
| C21  | H9 <sup>2</sup>    | 3.498    | C21  | H12A <sup>4</sup>  | 3.440    |
| C21  | H16A <sup>2</sup>  | 2.904    | C21  | H17 <sup>4</sup>   | 3.521    |
| C22  | H19A <sup>1</sup>  | 3.388    | C22  | H28A <sup>1</sup>  | 3.479    |
| C22  | H29B <sup>8</sup>  | 3.452    | C23  | H14 <sup>5</sup>   | 3.331    |
| C23  | H29B <sup>8</sup>  | 3.403    | C24  | H12A <sup>4</sup>  | 3.253    |
| C24  | H12B <sup>4</sup>  | 3.182    | C24  | H16A <sup>2</sup>  | 3.160    |
| C24  | H17 <sup>4</sup>   | 3.088    | C24  | H27B <sup>2</sup>  | 3.505    |
| C25  | H9 <sup>2</sup>    | 3.148    | C25  | H16A <sup>2</sup>  | 3.584    |
| C25  | H19B <sup>2</sup>  | 3.491    | C25  | H28B <sup>9</sup>  | 3.315    |
| C26  | H12B <sup>10</sup> | 3.594    | C26  | H29B <sup>8</sup>  | 3.091    |
| C27  | H4 <sup>5</sup>    | 2.724    | C27  | H17 <sup>11</sup>  | 3.243    |
| C27  | H30 <sup>11</sup>  | 3.448    | C28  | H14 <sup>12</sup>  | 3.426    |
| C28  | H20 <sup>12</sup>  | 3.589    | C28  | H25A <sup>13</sup> | 3.215    |

Table S30. Intermolecular contacts less than 3.60 Å involving hydrogens (continued)

| atom | atom               | distance | atom | atom               | distance |
|------|--------------------|----------|------|--------------------|----------|
| C28  | H30 <sup>10</sup>  | 3.542    | C29  | H12A <sup>4</sup>  | 3.535    |
| C29  | H12B <sup>4</sup>  | 3.032    | C29  | H19B <sup>2</sup>  | 3.492    |
| C29  | H23B <sup>14</sup> | 3.434    | C29  | H26A <sup>14</sup> | 3.113    |
| C29  | H26B <sup>2</sup>  | 3.114    | H4   | O5 <sup>3</sup>    | 3.328    |
| H4   | N6 <sup>3</sup>    | 2.010    | H4   | C15 <sup>3</sup>   | 3.144    |
| H4   | C18 <sup>4</sup>   | 3.535    | H4   | C27 <sup>3</sup>   | 2.724    |
| H4   | H18A <sup>4</sup>  | 3.266    | H4   | H18B <sup>4</sup>  | 2.984    |
| H4   | H23A <sup>3</sup>  | 3.031    | H4   | H25B <sup>4</sup>  | 3.548    |
| H4   | H27A <sup>3</sup>  | 3.140    | H4   | H27B <sup>3</sup>  | 2.548    |
| H4   | H30 <sup>3</sup>   | 2.759    | H8   | C16 <sup>2</sup>   | 3.369    |
| H8   | H16A <sup>2</sup>  | 3.048    | H8   | H16B <sup>2</sup>  | 2.794    |
| H9   | C18 <sup>4</sup>   | 3.247    | H9   | C21 <sup>4</sup>   | 3.498    |
| H9   | C25 <sup>4</sup>   | 3.148    | H9   | H18B <sup>4</sup>  | 2.540    |
| H9   | H25B <sup>4</sup>  | 2.563    | H12A | C21 <sup>2</sup>   | 3.440    |
| H12A | C24 <sup>2</sup>   | 3.253    | H12A | C29 <sup>2</sup>   | 3.535    |
| H12A | H16B <sup>2</sup>  | 3.538    | H12A | H24 <sup>2</sup>   | 3.482    |
| H12A | H25A <sup>2</sup>  | 3.286    | H12A | H28A <sup>1</sup>  | 3.216    |
| H12B | C24 <sup>2</sup>   | 3.182    | H12B | C26 <sup>6</sup>   | 3.594    |
| H12B | C29 <sup>2</sup>   | 3.032    | H12B | H24 <sup>2</sup>   | 3.278    |
| H12B | H26A <sup>6</sup>  | 2.681    | H12B | H28A <sup>1</sup>  | 3.559    |
| H12B | H29A <sup>2</sup>  | 3.400    | H12B | H29B <sup>2</sup>  | 3.021    |
| H13  | N6 <sup>3</sup>    | 3.347    | H13  | C16 <sup>2</sup>   | 3.563    |
| H13  | H16A <sup>2</sup>  | 3.107    | H13  | H16B <sup>2</sup>  | 3.345    |
| H13  | H17 <sup>4</sup>   | 3.185    | H13  | H18B <sup>4</sup>  | 3.139    |
| H13  | H27A <sup>3</sup>  | 3.264    | H13  | H27B <sup>2</sup>  | 3.439    |
| H14  | O5 <sup>3</sup>    | 2.971    | H14  | N6 <sup>3</sup>    | 3.553    |
| H14  | C23 <sup>3</sup>   | 3.331    | H14  | C28 <sup>1</sup>   | 3.426    |
| H14  | H23A <sup>3</sup>  | 2.745    | H14  | H23B <sup>3</sup>  | 3.029    |
| H14  | H28A <sup>1</sup>  | 3.243    | H14  | H28C <sup>1</sup>  | 2.800    |
| H14  | H30 <sup>3</sup>   | 2.706    | H16A | C8 <sup>4</sup>    | 3.536    |
| H16A | C13 <sup>4</sup>   | 2.921    | H16A | C21 <sup>4</sup>   | 2.904    |
| H16A | C24 <sup>4</sup>   | 3.160    | H16A | C25 <sup>4</sup>   | 3.584    |
| H16A | H8 <sup>4</sup>    | 3.048    | H16A | H13 <sup>4</sup>   | 3.107    |
| H16A | H18B <sup>4</sup>  | 3.410    | H16A | H24 <sup>4</sup>   | 3.336    |
| H16A | H25B <sup>4</sup>  | 3.446    | H16B | O3 <sup>4</sup>    | 2.661    |
| H16B | C8 <sup>4</sup>    | 3.512    | H16B | C13 <sup>4</sup>   | 3.349    |
| H16B | H8 <sup>4</sup>    | 2.794    | H16B | H12A <sup>4</sup>  | 3.538    |



Table S30. Intermolecular contacts less than 3.60 Å involving hydrogens (continued)

| atom | atom              | distance | atom | atom               | distance |
|------|-------------------|----------|------|--------------------|----------|
| H16B | H13 <sup>4</sup>  | 3.345    | H16B | H28B <sup>9</sup>  | 3.592    |
| H16B | H30 <sup>11</sup> | 3.288    | H17  | C13 <sup>2</sup>   | 3.588    |
| H17  | C21 <sup>2</sup>  | 3.521    | H17  | C24 <sup>2</sup>   | 3.088    |
| H17  | C27 <sup>7</sup>  | 3.243    | H17  | H13 <sup>2</sup>   | 3.185    |
| H17  | H24 <sup>2</sup>  | 2.625    | H17  | H27A <sup>7</sup>  | 2.478    |
| H17  | H27B <sup>7</sup> | 3.172    | H18A | O4 <sup>2</sup>    | 3.102    |
| H18A | H4 <sup>2</sup>   | 3.266    | H18A | H24 <sup>5</sup>   | 3.370    |
| H18A | H27B <sup>7</sup> | 2.817    | H18B | O4 <sup>2</sup>    | 2.934    |
| H18B | C9 <sup>2</sup>   | 3.473    | H18B | C13 <sup>2</sup>   | 3.522    |
| H18B | H4 <sup>2</sup>   | 2.984    | H18B | H9 <sup>2</sup>    | 2.540    |
| H18B | H13 <sup>2</sup>  | 3.139    | H18B | H16A <sup>2</sup>  | 3.410    |
| H18B | H27A <sup>7</sup> | 3.522    | H18B | H27B <sup>7</sup>  | 3.177    |
| H19A | O2 <sup>12</sup>  | 3.424    | H19A | C22 <sup>12</sup>  | 3.388    |
| H19A | H20 <sup>12</sup> | 3.009    | H19A | H22 <sup>12</sup>  | 2.774    |
| H19A | H25B <sup>4</sup> | 3.136    | H19B | C25 <sup>4</sup>   | 3.491    |
| H19B | C29 <sup>4</sup>  | 3.492    | H19B | H20 <sup>12</sup>  | 3.588    |
| H19B | H25B <sup>4</sup> | 2.521    | H19B | H29A <sup>4</sup>  | 2.788    |
| H20  | C28 <sup>1</sup>  | 3.589    | H20  | H19A <sup>1</sup>  | 3.009    |
| H20  | H19B <sup>1</sup> | 3.588    | H20  | H28A <sup>1</sup>  | 3.187    |
| H20  | H28C <sup>1</sup> | 3.148    | H20  | H29A <sup>13</sup> | 3.100    |
| H22  | H19A <sup>1</sup> | 2.774    | H22  | H28A <sup>1</sup>  | 3.463    |
| H22  | H29B <sup>8</sup> | 2.844    | H23A | O4 <sup>5</sup>    | 3.131    |
| H23A | C14 <sup>5</sup>  | 3.382    | H23A | H4 <sup>5</sup>    | 3.031    |
| H23A | H14 <sup>5</sup>  | 2.745    | H23B | C29 <sup>8</sup>   | 3.434    |
| H23B | H14 <sup>5</sup>  | 3.029    | H23B | H26A <sup>6</sup>  | 3.329    |
| H23B | H26B <sup>6</sup> | 3.258    | H23B | H28C <sup>6</sup>  | 3.338    |
| H23B | H29A <sup>8</sup> | 3.351    | H23B | H29B <sup>8</sup>  | 2.830    |
| H24  | O5 <sup>4</sup>   | 3.545    | H24  | C12 <sup>4</sup>   | 3.595    |
| H24  | C17 <sup>4</sup>  | 3.360    | H24  | H12A <sup>4</sup>  | 3.482    |
| H24  | H12B <sup>4</sup> | 3.278    | H24  | H16A <sup>2</sup>  | 3.336    |
| H24  | H17 <sup>4</sup>  | 2.625    | H24  | H18A <sup>3</sup>  | 3.370    |
| H24  | H27A <sup>3</sup> | 2.890    | H24  | H27B <sup>2</sup>  | 3.025    |
| H25A | O3 <sup>4</sup>   | 3.424    | H25A | C28 <sup>9</sup>   | 3.215    |
| H25A | H12A <sup>4</sup> | 3.286    | H25A | H28A <sup>9</sup>  | 3.182    |
| H25A | H28B <sup>9</sup> | 2.461    | H25B | O4 <sup>2</sup>    | 2.963    |
| H25B | C9 <sup>2</sup>   | 3.408    | H25B | C14 <sup>2</sup>   | 3.532    |
| H25B | C19 <sup>2</sup>  | 3.172    | H25B | H4 <sup>2</sup>    | 3.548    |

Table S30. Intermolecular contacts less than 3.60 Å involving hydrogens (continued)

| atom | atom               | distance | atom | atom               | distance |
|------|--------------------|----------|------|--------------------|----------|
| H25B | H9 <sup>2</sup>    | 2.563    | H25B | H16A <sup>2</sup>  | 3.446    |
| H25B | H19A <sup>2</sup>  | 3.136    | H25B | H19B <sup>2</sup>  | 2.521    |
| H25B | H28B <sup>9</sup>  | 3.393    | H26A | O5 <sup>10</sup>   | 3.523    |
| H26A | C29 <sup>8</sup>   | 3.113    | H26A | H12B <sup>10</sup> | 2.681    |
| H26A | H23B <sup>10</sup> | 3.329    | H26A | H29A <sup>8</sup>  | 3.507    |
| H26A | H29B <sup>8</sup>  | 2.389    | H26B | C29 <sup>4</sup>   | 3.114    |
| H26B | H23B <sup>10</sup> | 3.258    | H26B | H29A <sup>4</sup>  | 2.789    |
| H26B | H29B <sup>4</sup>  | 3.082    | H27A | O5 <sup>11</sup>   | 3.000    |
| H27A | C17 <sup>11</sup>  | 3.121    | H27A | H4 <sup>5</sup>    | 3.140    |
| H27A | H13 <sup>5</sup>   | 3.264    | H27A | H17 <sup>11</sup>  | 2.478    |
| H27A | H18B <sup>11</sup> | 3.522    | H27A | H24 <sup>5</sup>   | 2.890    |
| H27A | H30 <sup>11</sup>  | 2.850    | H27B | O4 <sup>5</sup>    | 3.042    |
| H27B | C18 <sup>11</sup>  | 3.436    | H27B | C24 <sup>4</sup>   | 3.505    |
| H27B | H4 <sup>5</sup>    | 2.548    | H27B | H13 <sup>4</sup>   | 3.439    |
| H27B | H17 <sup>11</sup>  | 3.172    | H27B | H18A <sup>11</sup> | 2.817    |
| H27B | H18B <sup>11</sup> | 3.177    | H27B | H24 <sup>4</sup>   | 3.025    |
| H27B | H30 <sup>11</sup>  | 3.389    | H28A | O2 <sup>12</sup>   | 2.598    |
| H28A | O3 <sup>12</sup>   | 2.830    | H28A | C10 <sup>12</sup>  | 3.254    |
| H28A | C22 <sup>12</sup>  | 3.479    | H28A | H12A <sup>12</sup> | 3.216    |
| H28A | H12B <sup>12</sup> | 3.559    | H28A | H14 <sup>12</sup>  | 3.243    |
| H28A | H20 <sup>12</sup>  | 3.187    | H28A | H22 <sup>12</sup>  | 3.463    |
| H28A | H25A <sup>13</sup> | 3.182    | H28B | O3 <sup>12</sup>   | 3.021    |
| H28B | O5 <sup>10</sup>   | 3.078    | H28B | C25 <sup>13</sup>  | 3.315    |
| H28B | H16B <sup>13</sup> | 3.592    | H28B | H25A <sup>13</sup> | 2.461    |
| H28B | H25B <sup>13</sup> | 3.393    | H28B | H30 <sup>10</sup>  | 3.203    |
| H28C | O3 <sup>12</sup>   | 3.172    | H28C | O5 <sup>10</sup>   | 2.900    |
| H28C | C14 <sup>12</sup>  | 3.569    | H28C | H14 <sup>12</sup>  | 2.800    |
| H28C | H20 <sup>12</sup>  | 3.148    | H28C | H23B <sup>10</sup> | 3.338    |
| H28C | H30 <sup>10</sup>  | 3.124    | H29A | H12B <sup>4</sup>  | 3.400    |
| H29A | H19B <sup>2</sup>  | 2.788    | H29A | H20 <sup>9</sup>   | 3.100    |
| H29A | H23B <sup>14</sup> | 3.351    | H29A | H26A <sup>14</sup> | 3.507    |
| H29A | H26B <sup>2</sup>  | 2.789    | H29B | C22 <sup>14</sup>  | 3.452    |
| H29B | C23 <sup>14</sup>  | 3.403    | H29B | C26 <sup>14</sup>  | 3.091    |
| H29B | H12B <sup>4</sup>  | 3.021    | H29B | H22 <sup>14</sup>  | 2.844    |
| H29B | H23B <sup>14</sup> | 2.830    | H29B | H26A <sup>14</sup> | 2.389    |
| H29B | H26B <sup>2</sup>  | 3.082    | H30  | O3 <sup>5</sup>    | 2.213    |
| H30  | O4 <sup>5</sup>    | 3.327    | H30  | C10 <sup>5</sup>   | 2.972    |

Table S30. Intermolecular contacts less than 3.60 Å involving hydrogens (continued)

| atom | atom              | distance | atom | atom              | distance |
|------|-------------------|----------|------|-------------------|----------|
| H30  | C14 <sup>5</sup>  | 3.154    | H30  | C27 <sup>7</sup>  | 3.448    |
| H30  | C28 <sup>6</sup>  | 3.542    | H30  | H4 <sup>5</sup>   | 2.759    |
| H30  | H14 <sup>5</sup>  | 2.706    | H30  | H16B <sup>7</sup> | 3.288    |
| H30  | H27A <sup>7</sup> | 2.850    | H30  | H27B <sup>7</sup> | 3.389    |
| H30  | H28B <sup>6</sup> | 3.203    | H30  | H28C <sup>6</sup> | 3.124    |

Symmetry Operators:

- |                         |                           |
|-------------------------|---------------------------|
| (1) $-X+1, Y+1/2-1, -Z$ | (2) $-X+1, Y+1/2-1, -Z+1$ |
| (3) $X+1, Y, Z$         | (4) $-X+1, Y+1/2, -Z+1$   |
| (5) $X-1, Y, Z$         | (6) $-X, Y+1/2-1, -Z$     |
| (7) $-X, Y+1/2-1, -Z+1$ | (8) $X-1, Y, Z-1$         |
| (9) $X, Y, Z+1$         | (10) $-X, Y+1/2, -Z$      |
| (11) $-X, Y+1/2, -Z+1$  | (12) $-X+1, Y+1/2, -Z$    |
| (13) $X, Y, Z-1$        | (14) $X+1, Y, Z+1$        |
